# Supplementary material
Source: MDPI journal article supplement (https://www.mdpi.com/2071-1050/13/14/7835)
Supplement: s1 [file s1]

Archive with 7 entries (7 files):
- Table S2 Revision-edited.xlsx
- Table S3 Revision-edited.xlsx
- Table S6 Revision-edited.xlsx
- Figure S1.pdf
- Table S1 Revision track changes-edited.pdf
- Table S4 Revision track changes-edited.pdf
- Table S5 Revision track changes-edited.pdf
