# Supplementary material
Source: MDPI journal article supplement (https://www.mdpi.com/2071-1050/13/14/7835)
Supplement: s1 [file s1 › Table S1 Revision track changes-edited.pdf]

**Table S1.** Road segments and city parks for data collection in each city.

| Province                  | City/Municipality/Regency | Data source* | Road segment/park**                                                                                                                                                                                                                                                                                        |
|---------------------------|---------------------------|--------------|------------------------------------------------------------------------------------------------------------------------------------------------------------------------------------------------------------------------------------------------------------------------------------------------------------|
| <b>Banten</b>             | Rangkasbitung             | V            | Jl Leuwidamar-Jl Maulana Yusuf-Jl Iko Djatmiko-Jl Kejaksaan-Jl Multatuli-Jl KH Atim-Jl Pahlawan-Jl RA Kartini-Jl Siliwangi-Jl Kadu Agung-Cileles-Jl Syeh Nawawi-Jl Soekarno Hatta-Jl Otista-Jl A Yani-Jl Sunan Kalijaga                                                                                    |
|                           | Pandeglang                | V            | Jl AMD Lintas Timur-Jl Nasional-Jl Raya Kabuhan-Jl Mayor Widagdo-Jl Moh Idrus-Jl Gunung Karang-Jl Cikondang                                                                                                                                                                                                |
|                           | Kota Cilegon              | V            | Jl Ciwedes-Cigunung-Jl Raya Bojonegoro-Jl Kapten Piere Tendean-Jl Sutami-Jl Australia-Jl Eropa-Jl Jend Katamso-Jl R Suprpto-Jl Raya Anyer-Jl A Yani-Jl Lingkar Selatan                                                                                                                                     |
|                           | Serang                    | V            | Jl Syeh Moh Nawawi-Jl Raya Pandeglang-Jl Kejaksaan 1-Jl Yusuf Notolidaya-Jl Veteran-Jl Diponegoro-Jl Hasanuddin-Jl Raya Banten-Jl Samaun Bakri-Jl Raya Petir Serang-Jl Ki Anjurnum-Jl Ciwaru Raya-Jl KH Abdul Latif-Jl Raya Cilegon-Jl Mayor Safei-Jl A Yani-Jl Sudirman-Jl Lingkar Selatan-Jl Kol Suwandi |
|                           | Kota Tangerang            | V            | Jl Imam Bonjol-Jl Raya Merdeka-Jl Daan Mogot-Jl Raya Pasar kemis-Jl Prabu Siliwangi-Jl Prabu Kiansantang-Jl Gatot Subroto-Jl Raya Bugel-Jl Arya Wangsakara-Jl Raya Mauk-Jl Moh Toha-Jl Raya TMP Taruna-Jl Jend Sudirman                                                                                    |
|                           | Kota Tangerang Selatan    | V            | Jl Letnan Sutopo-Jl Ciater Raya-Jl Raya Bukit Sarua-Jl Ciputat BSD-Jl Raya Rawa Buntu-Jl Victor BSD-Jl Raya Ciater-Jl Tekno Widya-Jl Raya Serpong-Jl Ki Hajar Dewantara-Jl Cenderawasih-Jl St Syahrir                                                                                                      |
| <b>DKI Jakarta</b>        | Jakarta Pusat             | F            | Taman Situ Lembang-Taman Surapati-Taman Menteng-Jl Imam Bonjol-Jl Diponegoro-Jl Matraman Raya-Jl Kartini-Jl Mangga Besar-Jl Suprpto-Jl Pramuka-Jl Lontar Raya                                                                                                                                              |
|                           | Jakarta Utara             | V            | Jl Jalan Raya-Jl Swasembada-Jl Plumpang Semper-Jl Sindang-Jl Koramil-Jl Enggano-Jl Saudara Raya-Jl Warakes-Jl Gedung Panjang-Jl Muara Baru-Jl Raya Pluit                                                                                                                                                   |
|                           | Jakarta Barat             | V            | Jl Puri Kembangan-Jl Pesanggrahan-Jl Meruya Selatan-Jl H Muchtar Raya-Jl Swadarma Raya-Jl Srengseng Raya-Jl Pesanggrahan-Jl Pedongkelan Raya                                                                                                                                                               |
|                           | Jakarta Selatan           | F            | Taman Ayodya-Jl Martatihahu-Jl Tangkuban Perahu-Taman Mataram-Jl Sungai Ciliwung-Jl Fatmawati-Jl Jendral Sudirman-Jl Pattimura-Jl Prapanca-Jl Radio Dalam-Jl Kemang Raya-Jl Bangka-Jl Tendean-Jl Gandaria I-Jl Gandaria Tengah-Jl Gandaria II-Jl Gatot Subroto                                             |
|                           | Jakarta Timur             | V            | Jl Revolusi-Jl Bekasi Timur Raya-Jl Pegangsaan 2-Jl Mandiri Utara-Jl Boulevard Timur-Jl Arteri Kelapa Gading — Jl Kayu Putih Raya-Jl KRT Rajiman                                                                                                                                                           |
| <b>Jawa Barat (Jabar)</b> | Kota Bogor                | F            | Jl Pajajaran- Jl Sudirman- Jl Juanda- Jl A Yani-Jl Dadali- Jl Bangbarung Raya-Jl Pandu Raya                                                                                                                                                                                                                |
|                           | Depok                     | V [50]       | Jl Margonda Raya-Jl Arif Rahman Hakim-Jl Nusantara Raya-Jl Raya Sawangan; road side and city trees of Depok city                                                                                                                                                                                           |

| Province                | City/Municipality/Regency | Data source* | Road segment/park**                                                                                                                                                                                                                      |
|-------------------------|---------------------------|--------------|------------------------------------------------------------------------------------------------------------------------------------------------------------------------------------------------------------------------------------------|
|                         | Bekasi                    | V [50]       | Jl A Yani-Jl Jend Sudirman-Jl Sutan Agung-Jl Veteran-Jl Pramuka-Jl Juanda-Jl Pantura-Jl Perjuangan-Jl Guntur Raya-Jl Jati Raya-Jl Gunung Gede-Jl Kalibaru; road side and city trees of Bekasi city                                       |
|                         | Sukabumi                  | V            | Jl Lingkar Dalam-Jl Perbangunan-Jl Nanggaleng-Jl Siliwangi-Jl Raya Cisaat-Jl Bayangkara-Jl Perintis Kemerdekaan-Jl Surya Kencana-Jl Siliwangi-Jl Merbabu-Jl Babakan Sirna-Jl Arif Rahman-Jl Pabuaran-Jl Lettu Bakri                      |
|                         | Cianjur                   | V            | Jl Nanggaleng-Jl Arif Rahman-Jl Moh Yamin-Jl Raya Baros-Jl Raya Cibeber-Jl KH Bin Nuh-Jl HOS Cokro-Jl Siliwangi-Jl Surya Kencana-Taman Prawitasari-Jl KH Saleh                                                                           |
|                         | Subang                    | V            | Jl RA Kartini-Jl Letjend S. Parman-Jl Ade Irma Suryani-Jl Wangsa Golfana-Jl A Yani-Jl Ukong Sutaatmaja-Jl M Sutoyo-Jl Kapt Hanafi-Jl KH Dewantoro-Jl Darodiharjo                                                                         |
|                         | Bandung                   | [51]         | All Bandung city parks                                                                                                                                                                                                                   |
|                         | Sumedang                  | V            | Jl Prabu Gajah Agung-Jl Lingkar Sindang Wado-Jl Rajawali-Jl Pacuan Kuda-Jl ABdurahman-Jl Kutamaya-Jl Panyingkiran-Jl Tampomas-Jl Sebelas April-Jl Serma Muhtar                                                                           |
|                         | Majalengka                | V            | Jl Abdul Hakim-Jl Siliwangi-Jl Jatiwangi Majalengka-Jl EMen Slamet-Jl Suma-Jl Babakan-Jl Imam Bonjol-Jl Tubagus Rangin-Jl Siti Aminah-Jl Pemda-Jl Satari                                                                                 |
|                         | Kota Cirebon              | V            | Jl Raya Panembahan-Jl Otista-Jl Tuparev-Jl Kartini-Jl Veteran-Jl Cemara-Jl Sisinga Mangaraja-Jl Benteng-Jl Pasuketan-Jl Yos Sudarso-Jl Kesunanan-Jl Kalijaga-Jl Buyut-Jl Pagajahan-Jl Ariodinoto-Jl Astana Garub-Jl Kesambi-Jl Dr Sutomo |
|                         | Kuningan                  | F            | Jl Siliwangi-Jl Cilowa-Jl Dewi Satika-Jl Veteran- Jl RE Martadinata- Jl Raya Cirendang- Jl Otista- Jl Syeh Maulana Akbar- Jl Pramuka-Jl Dipati Ewangga-Jl Nanggaleng-Jl Soekarno-Jl Jend Sudirman                                        |
| Jawa Tengah<br>(Jateng) | Tasikmalaya               | V            | Jl Perintis Kemerdekaan-Jl KHZ Mustofa-Jl Bantarsari-Jl Bantar-Jl Galunggung-Jl Garuda-Jl Gubernur Sewaka-Jl Mangkubumi-Jl Mayor Tobing-Jl Letjend Mersyudi                                                                              |
|                         | Banjar                    | V            | Jl Husein Kartasmita-Jl Perintis Kemerdekaan-Jl Petaruman-Jl Kantor Pos-Jl Lengkap Lancar-Lakbok-Jl Tentara Pelajar-Jl Gotong Royong-Jl Raya Banjar                                                                                      |
|                         | Purwokerto                | F            | Jl Jend Sudirman-Jl Raya Banjarnegara-Alunalun-Gg Bajug-Jl Gerilya-Jl Perintis Kemerdekaan-Jl Prof Yamin-Taman Andong-Jl Prof Boenjamin-Tanam Kota Pasir Kulon-GOR-Jl A Yani-Jl KS Tubun                                                 |
|                         | Banjarnegara              | F            | Jl Raya Banjarnegara Bawang-Jl Pemuda-Jl Sokanandi-Jl Letnan Karyono-Jl Veteran-Jl Dipayuda-Jl A Yani-Jl Busheri-Jl MT Haryono-Jl DI Panjaitan-Alunalun                                                                                  |
|                         | Wonosobo                  | F            | Jl Raya Kalierang-Jl A Yani-Jl Kartini-Jl Pemuda-Jl Sukarno Hatta-Jl Kyai Muntang-Jl S Parman-Jl Wsb Kretek-Jl KH Abdurahman Wahid-Jl Pagude                                                                                             |
|                         | Mungkid-Magelang          | F            | Jl Raya Smg Yogya-Jl Urip Sumaharjo-Jl Gatot Subroto-Jl Tentara Pelajar-Jl Sawoedi Wibowo-Jl Magelang Purworejo-Jl A Yani-Jl Diponegoro                                                                                                  |

| Province             | City/Municipality/Regency | Data source* | Road segment/park**                                                                                                                                                                                                                                      |
|----------------------|---------------------------|--------------|----------------------------------------------------------------------------------------------------------------------------------------------------------------------------------------------------------------------------------------------------------|
|                      | Cilacap                   | V            | Jl Urip Sumoharjo-Jl Perintis Kemerdekaan-Jl Gatot Subroto-Jl S Parman-Jl Jend Sudirman-Jl Mesjid-Jl MT Haryono-Jl DI Panjaitan-Jl Nusantara-Jl Dokter Sutomo                                                                                            |
|                      | Kebumen                   | V            | Jl Lingkar kota-Jl Kutoarjo-Jl A Yani-Jl Pahlawan-Jl Sarbini-Jl Sokka-Jl Pajagoan-Jl Kejan                                                                                                                                                               |
|                      | Kota Surakarta            | V            | Jl Solo Srage-Jl Raya Palur-Jl Ir Sutami-Jl Kol Sutarto-Jl A Yani-Jl Slamet Riyadi-Jl Dr Rajiman-Taman Balai Kambang-Jl Brigjen Sudiarto-UNS Belevard Kentingan                                                                                          |
|                      | Kota Salatiga             | V            | Jl Fatmawati-Jl Jend Sudirman-Jl Sukarno Hatta-Jl Diponegoro-Jl Ozandhi-Jl Lingk Selatan Salatiga-Jl Imam Bonjol-Jl Kauman-Jl Purbaya-Jl A Yani-Jl Veteran-Jl Pattimura                                                                                  |
|                      | Wonogiri                  | V            | Jl Wonogiri Sukoharjo-Jl Wonogiri Wuryantoro-Jl Tentara Pelajar-Jl Gatot Subroto-Jl Letjen Suprpto-Jl Katamso                                                                                                                                            |
|                      | Kota Tegal                | V            | Jl Dr Cipto Mangunkusumo-Jl Kol Sugiyono-Jl Teuku Umar-Jl Kapten Sudibyo-Jl Dr Soetomo-Jl Gajah Mada-Jl MT Haryono-Jl Ternate-Jl Yos Sudarso-Jl Moh Toha-Jl Slamet Riyadi-Jl Buya Hamka-Jl Cik Ditiro                                                    |
|                      | Batang                    | V            | Jl Slamet Riyadi-Jl Jend Sudirman-Jl Mayjend Sutoyo-Jl KKO Usman-Jl RE Martadinata-Jl AZ Mochamad-Jl Sultan Agung-Jl Rimat Bakti                                                                                                                         |
|                      | Purwodadi                 | V            | Jl A Yani-Jl Demak Purwodadi-Jl S Parman-Jl Gatot Subroto-Jl Kauman-Jl Gajahmada-Jl Diponegoro-Jl R Suprpto-Jl Sudirman                                                                                                                                  |
|                      | Kudus                     | V            | Jl Babalan Prawoto-Jl A Yani-Jl Sunan Muria-Jl Diponegoro-Jl Simpang Tujuh-Jl Pantura-Jl Sudirman-Jl HOS Cokroaminoto-Jl Pattimura-Jl Lingkar Timur-Jl Lingkar Barat-Jl Pecangan-Taman Ganesha                                                           |
|                      | Kota Semarang             | V            | Jl Sriwibowo Raya-Jl Siliwangi-Jl Sudirman-Jl Sugiyono Pranoto-Jl Pandanaran-Jl Pahlawan-Jl Diponegoro-Jl Smg Yogya-Jl Raden Patah-Jl Letjend Suprpto-Jl Imam Bonjol-Jl Suratmo-Jl WR Supratman-Jl Simangun-Jl Menoreh Raya-Jl MT Haryono-Jl Kali Garang |
|                      | Demak                     | V            | Jl Sultan Fatah-Jl Raya Demak Kudus-Jl Lingkar Demak-Jl Demak Bonang-Jl Kyai Singkil-Jl Sunan Kalijoyo-Jl Sultan Hadiwijoyo-Jl Bhayangkara                                                                                                               |
|                      | Jepara                    | V            | Jl Kedung-Jl Sudirman-Jl AR Hakim-Jl Veeran-Jl Diponegoro-Jl Kartini-Jl A Yani-Jl Shima-Jl Jepara Bangsri-Jl Baru Semarang-Jl RA Ngasirah-Jl RA Rukmini-Jl Ratu Kalinyamat-Jl KS Tubun                                                                   |
|                      | Rembang                   | V            | Jl Pantura-Jl Krajan Rembang-Jl Jend Sudirman-Jl Demang Waru-Jl Pentungan Pasar-Jl Lingkar-Jl Raya Rembang-Jl Pemuda-Jl Pahlawan-Jl Taman Bahagia-Jl Mojopahit-Jl Dr Soetomo-Jl Dr Wahidin-Jl KS Tubun                                                   |
| <b>DI Yogyakarta</b> | Bantul                    | F            | Jl Kribet-Jl Guwosari Raya-Jl Gua Selarung-Jl Pajangan-Jl Srandakan-Jl Panembahan Senopati-Jl Sultan Agung-Jl Jend Sudirman-Jl Wahid Hasyim-Jl Pramuka-Jl Tentara Pelajar-Jl Dr Wahidin                                                                  |
|                      | Wonosari                  | V            | Jl Ir Darmakun Darmokusumo-Jl Lingkar Utara-Jl MT Pontjodirjo-Jl Ki Demang Wonopawito-Jl Wonosari Jogja-Jl Kiagus Salim-Jl MGR Sugiyono Pranoto-Jl Baron-Jl Ki Ageng Giring-Jl KRT Juhdiningrat                                                          |

| Province              | City/Municipality/Regency | Data source* | Road segment/park**                                                                                                                                                                                                                                                                                                                                                                                                                                                  |
|-----------------------|---------------------------|--------------|----------------------------------------------------------------------------------------------------------------------------------------------------------------------------------------------------------------------------------------------------------------------------------------------------------------------------------------------------------------------------------------------------------------------------------------------------------------------|
| Jawa Timur<br>(Jatim) | Wates-Kulon progo         | V            | Jl Mandong-Jl Diponegoro-Jl Brigjen Katamso-Jl Pahlawan-Jl Ki Hadi Sugito-Jl Pirworejo Jogja-Jl Ki Jasuto-Jl Nyi Agend Serang-Jl KH Wahid hasyim                                                                                                                                                                                                                                                                                                                     |
|                       | Sleman                    | V            | Jl Turi-Jl Pakbun-Jl Tentara Pelajar-Jl Smg Yogya-Jl Magelang-Jl Letkol Subandri-Jl Kebun Agung-Jl Purabaya-Jl Temon-Jl Pendowo                                                                                                                                                                                                                                                                                                                                      |
|                       | Kota Yogyakarta           | F            | Jl Godean-Jl Jend Sudirman-Jl Kyai Mojo-Jl Urip Sumoharjo-Jl Kusuma Negara-Jl Raya Sutan Aging                                                                                                                                                                                                                                                                                                                                                                       |
|                       | Kepanjen-Malang           | V            | Jl Raya Gunung Kawi-Jl Lingkar Barat Kepanjen-Jl Jati Rejo Yoso-Jl Glanggang-Jl Raya Curung Rejo-Jl Raya Sukohaji-Jl Raya Panarukan-Jl Raya ojosari-Jl Sudirman-Jl A Yani-Jl Sultan Agung-Jl Panji-Jl Trunojoyo-Jl Sapta Marga-Jl Kemiri-Jl Krajan Raya-Jl Jenggolo-Jl Kawi                                                                                                                                                                                          |
|                       | Kota Surabaya             | F            | Jl Gresik Godean-Jl Rajawali-Jl Kembang Jepun-Jl Kapasan-Jl Kenjeran-Jl Raya Tempur Rejo-Jl Mulyosari-Jl ITS-Jl Kertajaya Indah-Jl Mayor Kertoajo-Jl Kertajaya-Jl Sulas-Jl Polisi Istimewa-Jl Soetomo-Jl Diponegoro-Jl Yos Sudarso-Jl Banyu Urip-Jl Dupak Rukun-Jl Demak-Jl Wonokromo-Jl A Yani-Jl Brigjen Katamso-Jl Raya Wadung Asri-Jl Rungkut Menanggal-Jl Rungkut Kidul-Jl Pasar Kembang-Jl Kedung Doro-Jl Blauran-Jl Bubutan-Jl Tambaksari-Jl Residen Sudirman |
|                       | Kota Malang               | F            | Jl Lawang-Jl S Parman-Jl Raya Malang Gempol-Jl A Yani-Jl Jaksa Agung Suprpto-Jl Jend Basuki Rahmat-Jl Kauman-Jl Arif Margono-Jl S Supriadi-Jl Kb Agung-Jl Mayjen Sungkono-Jl Raya Kiageng Gribig-Jl Gatot Subroto-Jl Sudirman-Jl Raya Panji Suroso-Jl Sumandar Priyo Sudarmo-Jl Tumenggung Suryo-Jl Ijen-Jl Pahlawan                                                                                                                                                 |
|                       | Kota Probolinggo          | V            | Jl Sukapura-Jl Raya Bromo-Jl Sukarno Hatta-Jl Sudirman-Jl Hasan Genggong-Jl Raya Lumajang-Jl Prof Hamka-Jl Sutami-Jl Mastrip-Jl Bengawan Solo                                                                                                                                                                                                                                                                                                                        |
|                       | Kota Madiun               | V            | Jl Ringroad Barat-Jl Yos Sudarso-Jl Pahlawan-Jl HOS Cokroaminoto-Jl Musi-Jl Mayjen Sungkono-Jl Urip Sumoharjo-Jl Kolonel Muhadi-Jl Setiabudi-Jl Sudirman-Jl Mastrip-Jl Sukarno Hatta-Jl HA Salim-Jl Kapten Tendean-Jl Basuki Rahmat-Jl S Parman-Jl Thamrin-Jl Sri Rejeki                                                                                                                                                                                             |
|                       | Kota Pasuruan             | V            | Jl Raya Kraton-Jl Sukarno Hatta-Jl A Yani-Jl Veteran-Jl Juanda-Jl H Ashari-Jl Untung Suropati-Jl Urip Sumoharjo-Jl Gatot Subroto-Jl KH Ahmad Dahlan-Jl Sudirman-Jl Gajah Mada-Jl Hayam Wuruk-Jl Pattimura-Jl Pati Unus                                                                                                                                                                                                                                               |
|                       | Tuban                     | V            | Jl Semarang-Jl Kragan-Jl Pantura-Jl Manunggal-Jl WR Supratman-Jl Tuban Babat-Jl HOS Cokroaminoto-Jl Teuku Umar-Jl Gajah Mada-Jl Dr Wahidin-Jl Letda Sucipto-Jl Sunan Kalijogo-Jl Basuki Rachmat-Jl Pahlawan-Jl Majapait-Jl Lukman Hakim-Jl Pemuda-Jl Hayam Wuruk                                                                                                                                                                                                     |
|                       | Lamongan                  | V            | Jl Mastrip-Jl Raya Sugio-Jl R Basuki-Jl Lamong Rejo-Jl Sunan Drajat-Jl Pantura-Jl Tuban Surabaya-Jl Jaksa Agus Suprpto-Jl Pahlawan-Jl Kalianyar-Jl Sumargo-Jl Veteran-Jl Ronggo Hadi-Jl Merpati                                                                                                                                                                                                                                                                      |

| Province | City/Municipality/Regency | Data source* | Road segment/park**                                                                                                                                                                                                                                                                                         |
|----------|---------------------------|--------------|-------------------------------------------------------------------------------------------------------------------------------------------------------------------------------------------------------------------------------------------------------------------------------------------------------------|
|          | Bangil-Pasuruan           | V            | Jl Raya Gondang Legi-Jl Pattimura-Jl A Yani-Jl RA Kartini-Jl Raya Pandaan Bangil-Jl Mangga-Jl Oro oro Ombo-Jl Rambutan-Jl Mojoparon-Jl Paku Joyo-Jl Sili-Jl Bandeng-Jl Cumi Cumi-Jl Salem                                                                                                                   |
|          | Kraksaan-Probolinggo      | V            | Jl Raya Besuki-Jl Sudirman-Jl Kraksaan-Jl Raya Wangkal Mojolegi-Jl Kesengan-Jl S Parman-Jl Hasanuddin-Jl Diponegoro-Jl Imam Bonjol-Jl Abdurrahman Wahid-Jl Yos Sudarso                                                                                                                                      |
|          | Banyuwangi                | V            | Jl Johar-Jl Joyoboyo-Jl Argopuro-Jl Raden Wijaya-Jl Gajah Mada-Jl Brawijaya-Jl Raya Jember Babatan Kabot-Jl Jend S Parman-Jl Adisucipto-Jl Jagung Suprpto-Jl Wahid Hasyim-Jl Kapten Piere Tendean-Jl Husni Thamrin-Jl DI Panjaitan                                                                          |
|          | Jember                    | V            | Jl Supriadi-Jl Bondowoso Jember-Jl Slamet Riyadi-Jl Moh Seruji-Jl PB Sudirman-Jl Sultan Agung-Jl Gajahmada-Jl Hayam Wuruk-Jl Brawijaya-Jl Dharmawangsa-Jl Brigjen Katamso-Jl MT Haryono-Jl Basuki Rahmat-Jl Letjen Suprpto-Jl Kaca Piring                                                                   |
|          | Ponorogo                  | V            | Jl Letjen S Parman-Jl Letjen Sutoyo-Jl Letjen Suprpto-Jl Juanda-Jl Sudirman-Jl Gajah Mada-Jl Hasyim Asyari-Jl MT Haryono-Jl Brigjen Katamso-Jl Sukarno Hatta-Jl Ponorogo Madiun-Jl Yos Sudarso-Jl Halim Perdana Kusumah-Jl Panjaran Loro Rejo-Jl Kiangung Kutru-Jl Batoro Katong-Jl Trunojoyo-Jl Wali Songo |
|          | Nganjuk                   | V            | Jl Raya Bagor-Jl Raya Kedondong-Jl Wilis-Jl Gatot Subroto-Jl Sudirman-Jl Raya Nganjuk Madiun-Jl Bengawan Solo-Jl Arum Ndal-Jl Raya Guyangan-Jl Letjen Suprpto-Jl Trunojoyo-Jl Imam Bonjol-Jl Veteran-Jl WR Supratman-Jl Raya Wilis-Jl Pace Sukomoro-Jl Mayjen Sumpeno-Jl Soetomo                            |
|          | Bangkalan                 | F            | Jl Sukarno Hatta-Jl Sudirman-Jl Ki Lemah Duwur-Jl Raya Bancaran-Jl Pemuda Kaffa-Jl Jokotole-Jl KH Hasyim Asyari-Jl KH Achmad Marzuki-Jl KH Moh Toha-Jl Anggrek-Jl Mertajasah-Jl Halim Perdana Kusuma-Jl Sidingkap                                                                                           |
|          | Sumenep                   | V            | Jl Raya Pamekasan Sumenep-Jl Trunojoyo-Jl Slamet Riyadi-Jl Halim Perdana Kusuma-Jl Imam Bonjol-Jl Raya Manding-Jl Saluran Air-Jl Pahlawan-Jl Kumala-Jl Asta Tinggi-Jl Wahidin Sudiro Husodo-Jl Dr Cipto Mangunkusumo-Jl Lontar                                                                              |
|          | Kota Banda Aceh           | V [52]       | Jl Tengku Abdullah Ujung Rimba-Taman Sari Bustanussalatin; City garden                                                                                                                                                                                                                                      |
|          | Kota Langsa               | [53]         | Jl Jendral A Yani-Jl Prof A Madjid Ibrahim; Homegarden park                                                                                                                                                                                                                                                 |
|          | Kota Lhokseumawe          | V [54]       | Jl Merdeka-Taman Riyadah; Residential road                                                                                                                                                                                                                                                                  |
|          | Tapaktuan                 | V            | Jl Ben Mahmud-Jl Nyak Adam Kamil-Jl Hamzah Fansuri-Jl Syeh Abdul Rauf                                                                                                                                                                                                                                       |
|          | Meulaboh-Aceh Barat       | V            | Lapangan Teuku Umar-Pantai Ujung Karang-Jl Yos Sudarso-Jl Dr Sutomo-Jl Imam Bonjol-Masjid Baitul Makmur                                                                                                                                                                                                     |
|          | Kutacane                  | V            | Jl Kutacane-Taman Masjid Agung Attakwa-SMKN 1                                                                                                                                                                                                                                                               |
|          | Takengon                  | V            | Lapangan Muara Alam-Lapangan Sanggawa                                                                                                                                                                                                                                                                       |
|          | Blangkejeren              | V            | Jl Rama-Bale Musara                                                                                                                                                                                                                                                                                         |

| Province                       | City/Municipality/Regency     | Data source* | Road segment/park**                                                                                                                                                                                               |
|--------------------------------|-------------------------------|--------------|-------------------------------------------------------------------------------------------------------------------------------------------------------------------------------------------------------------------|
| <b>Sumatera Utara (Sumut)</b>  | Pematangsiantar               | V [55]       | Jl Linsum Tengah-Jl Merdeka-Jl Trembesi-Jl Rakutta Sembiring; catchment area                                                                                                                                      |
|                                | Kota Medan                    | [56-57]      | Green belt Medan city, Greenery in USU Campus                                                                                                                                                                     |
|                                | Lubuk pakam-Deli Serdang      | V            | Jl Batang Kuis Lubuk Pakam-Jl Kenya Jaya-Taman Kota-Jl Tanjung-Jl Kaya Agung-Jl Keramat-Jl WR Supratman                                                                                                           |
|                                | Kabanjahe-Karo                | V            | Jl Letjen Jamin Ginting-J Veteran-J Kota Cane-Jl Lau Kawat-Jl Semora                                                                                                                                              |
|                                | Balige-Toba Saosir            | V            | Jl Lintas Tengah Sumatera-Jl Serma Muda                                                                                                                                                                           |
|                                | Sibuhuan-Padang Lawas         | V            | Jl Ki Hajar Dewantoto-Jl Muh Yamin-Jl Veteran                                                                                                                                                                     |
|                                | Sipirok-Tapanuli Selatan      | V            | Jl Rumah Sakit-Alun alun Sipirok-Jl Simangambit-Jl Lintas Tengah Sumatera                                                                                                                                         |
|                                | Panyambungan-Mandailing Natal | V            | Jl Willem Iskandar-BNI Kota-Jl Lintas Tengah-Jl Brigjen Abdul Manaf Lubis                                                                                                                                         |
|                                | Pandan-Tapanuli Tengah        | V            | Jl Sibolga Padang Sidempuan-Jl Dongol Lumban Tobing-Jl Oswald Siahaan-Jl Madseh Kesayangan                                                                                                                        |
|                                | Padangsidempuan               | V            | Jl Lingkar-Jl AH Nasution-Jl Lintas Tengah Sumatera-Jl Tapan Nauli-Jl Sutan Sori Pada Mulia-Jl Patric Lumba-Jl Mayor PNB Alboin Hutabarat-Jl STN Mau Jalo-Jl Pembangunan-Jl Melati-Jl Yos Sudarso-Jl Prof M Yamin |
|                                | Tebingtinggi                  | V            | Jl Mayjen Panjaitan-J Perintis Kemerdekaan-Jl Imam Bonjol-Jl Mayjen Sutoyo-Jl Cemara-Jl Diponegoro-Jl Sisinga Mangaraja-Jl Merdeka-Jl Pulau Sumatera-Jl IR H Juanda-Jl Gunung Leuser                              |
| <b>Sumatera Barat (Sumbar)</b> | Kota Padang                   | F [58]       | Jl Selayo-Jl Padang Basi-Jl Raya Bandar Buat-Jl Moh Hatta-Jl Korong Gadang-Jl Limar Mais; Padang city                                                                                                             |
|                                | Kota Pariaman                 | V            | Jl Sicincin Malalak Bakiko-Jl Raya Pariaman Sicincin-Jl Imam Bonjol-Jl Pahlawan-Jl Teratai-Jl Sam Ratulangi-Jl Syeh Burhanuddin                                                                                   |
|                                | Kota Solok                    | V            | Jl Lintas Sumatera-Jl Moh Yamin-Jl Sukarno-Jl Salejo-Jl Dr Hamka-Jl Diponegoro-Jl Imam Bonjol-Jl Temboh Raya-Jl KS Tubun-Jl Veteran-RTH Kota                                                                      |
|                                | Pulau punjung-Darmasraya      | V            | Jl Lintas Sumatera-Jl Kubang Panjang-Koperasi BMT Darmasraya-Jl Pasanggrahan                                                                                                                                      |
|                                | Lubuk Basung-Agam             | V            | Jl Siti Manggapur-Jl Diponegoro-Jl Gajah Mada-Jl Rasuna Said-Jl Sukarno Hatta-Jl A Yani-Jl Tuanku Nan Renceh                                                                                                      |
|                                | Batu sangkar-Tanah Datar      | V            | Jl Moh Yamin-Jl Lintas Tengah Sumatera-Jl Batu Sangkar Selapang-Jl Sudirman-Jl Batu Sangkar                                                                                                                       |
|                                | Painan-Pesisir Selatan        | V            | Jl Padang bungku-Jl Ilyas Yakub-Jl Sudirman-Jl Perintis Kemerdekaan-Jl Moh Hatta-Jl Imam Bonjol-Jl Dr Hamka-Jl Lingkar Barat-Jl Pramuka-Jl Perintis Kemerdekaan                                                   |
|                                | Simpangampe-Pasaman Barat     | V            | Jl Raya Simpang 4-Jl Sijaih Joong Sarola-Jl Merdeka Barat-Jl Flores-Jl Bades                                                                                                                                      |
|                                | Sijunjung                     | V            | Jl Lintas Sumatera-Jl Tepi Sawah-Jl Raya Tj Ampalu-Jl Prof Yamin-Jl Diponegoro-Jl Sudirman                                                                                                                        |
|                                | Kota Pekanbaru                | V [59]       | Jl Raya Pekanbaru-Jl Kahardin-Jl Arifin Ahmad-Jl Sukarno Hatta-Jl Suka Karya; City forest                                                                                                                         |
| <b>Riau</b>                    | Rengat                        | V            | Jl Indragiri-Jl Lintas Sumatera-Jl AH 25-Jl Pematang Rebah-Jl AR Hakim-Jl Sultan-Jl DI Panjaitan-Jl Dwikora-Jl Seminar                                                                                            |

| Province                      | City/Municipality/Regency      | Data source* | Road segment/park**                                                                                                                                                                                                    |
|-------------------------------|--------------------------------|--------------|------------------------------------------------------------------------------------------------------------------------------------------------------------------------------------------------------------------------|
|                               | Teluk Kuantan-Kuantan Sengingi | V            | Jl Sudirman-Jl Air Molek-Jl Nepal Peranap                                                                                                                                                                              |
|                               | Pasir Pangarayan-Rokan Hulu    | V            | Jl Ujung Batu-Jl Diponegoro-Jl Imam Bonjol-Jl Ki Hajar Dewantoro-Jl Pangayoman-Jl Bukit Beringin-Jl Tuanku Tambusai-Jl Lingkar Pasir Pangarayan                                                                        |
|                               | Tembilahan-Indragiri Hilir     | V            | Jl Rengat Tembilahan-Jl Telaga Biru-Jl Prof Yamin-Jl Diponegoro-Jl KH Dewantoro-Jl Gajah Mada-Jl Pangeran Hidayat                                                                                                      |
|                               | Selat Panjang-Meranti          | V            | Jl Dorak-Jl Harapan Ujung-Jl Banglas-Jl Alah Air-Jl Puskesmas-Jl Pelajar-Jl Perjuangan                                                                                                                                 |
|                               | Bagansiapiapi-Rokan Hilir      | V            | Jl Lintas Bagan Siapiapi-Jl Pahlawan-Jl Raya Pusara Hilir-Taman Kota-Masjid-Jl Suratno-Jl Aman-Jl Pelabuhan Baru-Jl Syah Bandar                                                                                        |
|                               | Kota Dumai                     | V            | Jl Gatot Subroto-Jl Ratu Sima-Jl Sultan Hasanuddin-Jl A Yani-Jl Cemedak-Jl Diponegoro-Jl Pantai-Jl Gunung                                                                                                              |
| <b>Kepulauan Riau (Kepri)</b> | Kota Kijang-Bintan             | V [60]       | Jl Tokoto-Jl Tanda Kuning-Jl Taman Kota Kijang-Jl Sei Rahman-Hl Duyung; Teluk Sebung, Teluk Bintanm Sri Kuala Lobam and Toapa Sub districts.                                                                           |
|                               | Batam                          | V            | Jl Batu Ceper-Jl Letjen Suprpto-Jl Sudirman-Jl Laksamana Bintan-Jl Bunga Raya                                                                                                                                          |
|                               | Tanjungpinang                  | V            | Jl Raya Dompok-Jl Cenderawasih-Jl Raja Fisabilliah-Jl Raya Cjuban-Jl Tj Pinang-Jl Gatot Subroto-Jl Ali Haji-Jl Arif R Hakim-Jl A Yani-Jl Kuantan                                                                       |
|                               | Tanjungbalai Karimun           | V            | RSUD Karimun-Jl Lingkar-Jl A Yani-Jl Raja Oesman-Jl Pertambangan                                                                                                                                                       |
| <b>Jambi</b>                  | Kota Jambi                     | V            | Jl MH Thamrin-Jl Mr Assaat-Jl Gatot Subroto-Jl Sudirman-Jl Sukarno Hatta-Jl Masda Abdurrahman Saleh-Jl Anggrek-Jl Lingkar Selatan                                                                                      |
|                               | Muara bungo-Bungo              | V            | Taman Pusparagan-Jl Prof Yamin-Jl Kusuma-Jl Diponegoro-Jl Durian-Jl Lintas Sumatera-Jl Manap-Jl M Yusuf-Jl Sapta Marga                                                                                                 |
|                               | Sungai penuh                   | V            | Jl Jend Sudirman-Jl Mayjen A Thalib-Jl Tanah Mendapa-Jl Sriwijaya-Jl Yos Sudarso-Jl Thamrin-Jl Sungai Bungkal-Jl Veteran-Jl Usman Halid-Jl A Yani-Jl Sukarno Hatta-Jl AMD Manunggal-Jl Stadion Pancasila-Jl Gajah Mada |
|                               | Muara tebo-Tebo                | V            | Jl Sultan Taha-Jl Muara Tebo-Jl Lama                                                                                                                                                                                   |
|                               | Sarolangun                     | V            | Jl Lintas Sumatera Sarolangun Lubuklinggau-Jl H Manap-Jl Sarolangun Muara Terbeni                                                                                                                                      |
|                               | Bangko-Merangin                | V            | Jl Letnan Isdaini-Jl Teuku Umar-Jl AR Syukur-Jl Hasanuddin-Jl Ali Soeddin-Jl Hasanuddin-Jl Pendidikan IBRD-Jl Sapta Marga                                                                                              |
| <b>Bengkulu</b>               | Bintuhan-Kaur                  | V            | Jl Simpang Trans Sumatera-Lapangan Merdeka-Jl Pantai Barat                                                                                                                                                             |
|                               | Kota Bengkulu                  | V            | Jl Soeprpto Dalam-Jl Trans Sumatera-Jl Dipti Agung Ngaso-Jl Adam Malik-Jl Sungai Hitam-Jl RE Martadinata-Jl Citandui-Jl Pancur Mas-Jl Bumiayu Raya-Jl Jenggalu-Jl Pariwisata-Jl Sedap Malam-Jl Karbela Raya            |
|                               | Curup-Rejang Lebong            | V            | Jl Kepahiang-Jl Jend Sudirman-Jl Thamrin-Jl Merdeka-Jl KH Hasim Asngari-Jl A Marzuki-Jl Sukowati-Jl Stadion-Jl Pramuka-Jl H Juanda-Jl Batu Galing-Jl Air Meles Bawah                                                   |

| Province                                 | City/Municipality/Regency         | Data source* | Road segment/park**                                                                                                                                                                                                                               |
|------------------------------------------|-----------------------------------|--------------|---------------------------------------------------------------------------------------------------------------------------------------------------------------------------------------------------------------------------------------------------|
|                                          | Arga Makmur-Bengkulu Utara        | V            | Jl Basuki Rahmat-Jl Sudirman-Jl Moh Hatta-Jl Sukarno-Jl Kol Alamsyah-Jl Raya Desa Talang Danau-Jl Air Merah-Jl Gunung Sari-Jl RA Kartini-Jl Padat Karya-Jl Prof Hazairin-Jl Fatmawati-Jl Dr AK Gani-Jl Samsul Bahrun                              |
|                                          | Muara aman-Lebong                 | V            | J Merdeka-Jl Mara-Jl Pramuka-Jl Lap Hatta-Jl Pangeran Zaenal Abidin                                                                                                                                                                               |
|                                          | Muko muko                         | V            | Jl Pulau Berantai-Jl RA Kartini-Jl Sultan Hidayatullah-Jl Letkol Bahrum-Jl Danau Nibung-Jl Kopral Ali Basha-Jl Trans Sumatera-Jl Jend Sudirman-Jl Kuku Besi                                                                                       |
|                                          | Manna-Bengkulu Selatan            | V            | Jl Lintas Barat-Jl Sudirman-Jl Kol Barlian-Jl SMA Karya-Jl Tukiran                                                                                                                                                                                |
|                                          | Tais-Seluma                       | V            | Jl Trans Sumatera Tais-Jl RA Kartini-Jl Baru-Jl Umar Ahmad                                                                                                                                                                                        |
| <b>Sumatera Selatan (Sumsel)</b>         | Lubuk linggau                     | V            | PT Taspem-Jl Trans Sumatera-Jl Kenanga-Jl Yos Sudarso-Jl Garuda-Jl Pattimura-Jl Depati Said-Jl Pematang Jaya                                                                                                                                      |
|                                          | Pagaralam                         | V            | Jl Piagam-Jl Pagar Alam Lahan-Jl Pesirah-Jl Kepahiang Pagar Alam-Jl Kombes Umar-Jl Bakri Hamid-Jl Alamsyah Ratu Prawiranegara-Jl Mayor Ruslan-Jl Lettu Hamid-Taman Kiantan Buah-Jl Mayor Rustam-Jl Letnan Nur Majis-Jl Soeprapto-Jl Laskar Wanita |
|                                          | Kota Palembang                    | V            | Jl Lintas Sumatera-Jl Kimoragan-Jl Wahid Hasyim-Jl A Yani-Jl HR Ryacudu-Jl Merdeka-Jl Let Murod-Jl Swadaya-Jl Inspektur Marzuki-Jl Way Hitam-Jl Sukarno Hatta                                                                                     |
|                                          | Kota Prabumulih                   | V            | Jl Jend Sudirman-Jl Trunojoyo-Jl Kumala-Jl Bukit Lebar-Jl Bima-Jl Gotong Royong-Jl Arimbi                                                                                                                                                         |
|                                          | Pangkalanbalai-Banyuasin          | V            | Jl Palembang Jambi-Lubuk Saung-Jl Lintas-Jl Kedondong Raya-Jl Banyuasin III-Jl Urip Sumoharyo-Jl KH Sulaiman-Jl Laskar A Rahman                                                                                                                   |
|                                          | Kota Kayuagung-Ogan Komering Ilir | V            | Jl Lintas Sumatera-Jl Lt Muhtar Saleh-Jl Pahlawan Kayu Agung-Jl HM Yusuf Singede Kane-Jl KH Ahmad Mekki-Jl Pratu Abraham                                                                                                                          |
|                                          | Sekayu-Musi Banyu Asin            | V            | Jl Jembatan Besi-Jl Balai Agung-Jl Randik-Jl Jaksa III-Jl Merdeka-Jl Sekayu-Jl Kol Wahid Udin-Jl Belitung-                                                                                                                                        |
|                                          | Indralaya-Ogan Ilir               | V            | Jl Lintas Sumatera-Jl Indralaya Raya-Jl Kopral Juni-Jl Tj Raya                                                                                                                                                                                    |
|                                          | Lahat                             | V            | Jl Lintas Tengah Sumatera-Jl Lintas Pagar Alam-Jl Letnan Alamsyah-Jl Mayor Ruslan-Jl Dr Emil Saleh-SMA Lakat-Jl RE Martadinata-Jl Beringin                                                                                                        |
|                                          | Martapura-Ogan Komering Ulu Timur | V            | Jl Lintas Tengah Sumatera-Jl Merdeka-Jl Jend Sudirman-Jl Letkol Diced-Jl Veteran                                                                                                                                                                  |
| <b>Kepulauan Bangka Belitung (Babel)</b> | Muntok-Bangka Barat               | V            | Jl Pangkal Pinang-Jl Sudirman-Jl Imam Bonjol-Jl Kantor Bupati-Jl Raya Menubing-Jl Kapten Alizen-Jl Peltim-Jl Menara Air                                                                                                                           |
|                                          | Sungailiat-Bangka                 | V            | Jl Dr Soetomo-Jl KH Agus Salim-Jl Sisingamangaraja-Jl Batin Tilbul-Jl Parai parai-Jl Jend Sudirman-Jl Sungai Liat-Jl Jurung-Jl Pattimura-Jl Karang Panjang-Jl Tambak Reklamasi-Jl Lintas Timur-Jl Teuku Umar-Jl Raya Pangkal Layang               |
|                                          | Taboali-Bangka Selatan            | V            | Jl Raya Gadung-Jl Sudirman-Jl Kerakasan-Jl Raya Rias-Jl Mayor Safri Rahman-Jl Sahuli Toha-Jl Alising-Jl Teladan-Jl AMD-Jl Bagger-Jl Kolong Dua-Jl Dr Wahidin                                                                                      |

| Province                           | City/Municipality/Regency | Data source* | Road segment/park**                                                                                                                                                                                         |
|------------------------------------|---------------------------|--------------|-------------------------------------------------------------------------------------------------------------------------------------------------------------------------------------------------------------|
|                                    | Koba-Bangka Tengah        | V            | Jl Namang Koba-Jl Kenanga Atas-Jl Sukarno Hatta-Jl Merdeka-Jl Listrik-Jl Jend Sudirman                                                                                                                      |
|                                    | Tanjungpandan-Belitung    | V            | Jl Badan-Jl Sudirman-Jl Sriwijaya-Jl Kemuning-Jl Pemuda-Jl Sijuk-Jl Air Ketekok-Jl Hasan Said-Jl Musa-Jl A Yani-Jl Gajah Mada-Jl Gaparman-Jl Hasim Idris-Jl Anwar-Jl Air Serkuk                             |
|                                    | Manggar-Belitung Timur    | V            | Jl Tengah Tj Pandan Manggar-Jl Raya Manggar-Jl Jend Sudirman-Serdang beach-Jl Kantor Pajak-Jl Gajah Mada-Jl Merbabu-Jl Kartini-Jl Pantai Nyiur-Jl Bakau-Jl Sekip 2-Jl Tj Mundong-Jl Numpang Empat           |
|                                    | Kota Pangkalpinang        | V            | Jl Rentok Pangkal Pinang-Masjid Jamik-Jl Raya Sungai Selan-Jl Solihin GP-Jl Sukarno Hatta-Jl Sempur-Jl Depati Hamzah-Jl Lintas Timur-Jl Cenderawasih-Jl M Saleh Zaenuddin-Jl Usman Ambar-Jl Balai-Jl Baru   |
| <b>Lampung</b>                     | Bandarlampung             | V            | Jl Imam Bonjol-Jl Nuri-Jl R Kartini-Jl Walter Mongisidi-Jl Teuku Umar-Jl ZA Pagar Alam-Jl Darussalam-Jl Pangeran Antasari-Jl Perintis Kemerdekaan-Jl Gatot Subroto                                          |
|                                    | Metro                     | V            | Jl AH Nasution-Jl Jend Sudirman-Jl Letjend Amir Machmud-Jl Budi Utomo-Jl Kenanga-Jl Raya Merdeka                                                                                                            |
|                                    | Krui-Pesisir Barat        | V            | Jl Trans Sumatera-Jl Krui Bintuhan                                                                                                                                                                          |
|                                    | Kotabumi-Lampung Utara    | V            | Jl Ketalang Bojong-J Abung Raya Timur-Jl Paseban-Jl ABG Raja Barat-Jl Veteran-Jl Raden Inten-Jl Jend Sudirman-Jl Lintas Tengah Sumatera-Jl KS Tubun-Jl Jaya Baya-Jl Ksatria-Jl Melati Indah-Jl Bunga Mayang |
|                                    | Menggala-Tulang Bawang    | V            | Jl Talang Tembesu-Jl Aspol-Jl Raya Gunung Sakti-Jl Lintas Sumatera-Jl Cemara-Jl Cendana                                                                                                                     |
|                                    | Sukadana-Lampung Timur    | V            | Jl Raya Sukadana-Jl Radin Inten-Jl Lintas Timur Sumatera-Jl Negeri Jemanten-Jl Marga Tiga                                                                                                                   |
|                                    | Kalianda                  | V            | Jl Lintas Sumatera-Jl Sukarno Hatta-Jl Lama Panengahan-Jl Raya Palembang-Jl Raya Kecapi-Jl Raya Kesugihan-Jl Veteran-Jl Kusuma Bangsa-Jl Pesisir                                                            |
| <b>Kalimantan Barat (Kalbar)</b>   | Singkawang                | V [61]       | Jl Pasar-Jl Padang Pasir; city forest                                                                                                                                                                       |
|                                    | Bengkayang                | V            | Kantor Bupati-Taman Hijau Sekoyak-Jl Sekoyak-Jl Raya Senggua Ledo-Jl Prawira-Jl Ngura-Jl Bambang Ismoyo-Jl Marzuki T-Jl Salenco                                                                             |
|                                    | Kota Pontianak            | V            | Airport Supadio-Jl Adi Sucipto-Jl Imam Bonjol-Jl Palembang-Jl Veteran-Stadion Sultan Syarif-Taman Alunalun Kapuas-Jl Rahadi Usman-Taman Bauk Mandiri-Tugu Pancasila-Jl Pak Kasih-Jl Lembah Murai            |
|                                    | Sanggau                   | V            | Jl Sambas-Sanggau-Ledo-Jl Kantor Camat                                                                                                                                                                      |
|                                    | Ketapang                  | V            | Jl Pelang Utara-Jl Rahadi Usman-Jl WR Supratman-Jl Arif Rahman-Taman Kota Ketapang-Jl Basuki Rahmat                                                                                                         |
|                                    |                           |              |                                                                                                                                                                                                             |
| <b>Kalimantan Tengah (Kalteng)</b> | Kota Palangkaraya         | V            | Taman Palangka Kota Cantik-Jl S Humanuddin-Jl RTA Milono-Jl Trans Kalimantan-Tugu Sukarno-Jl G Obos-Jl Raden Saleh-Jl Pramuka.                                                                              |
|                                    | Sampit                    | V            | Jl. A Yani-Jl DI Panjaitan-Jl Cristopul Mihing-Jl Cilik Riwut                                                                                                                                               |
|                                    | Pangkalanbun              | V            | Jl Gerilya-Jl Panglima Utar-Jl Utama Pasir Panjang-Jl Iskandar-Jl Natai Arahan                                                                                                                              |
|                                    | Kuala Kapuas              | V            | Jl Pemuda-Jl Trans Kalimantan-Jl Keruing-Jl Jawa-Jl Keruing I                                                                                                                                               |
|                                    | Puruk cahu                | V            | Gereja Hosana-Taman Sapan-Bundaaran-Kantor Bupati                                                                                                                                                           |

| Province                           | City/Municipality/Regency | Data source* | Road segment/park**                                                                                                                                                     |
|------------------------------------|---------------------------|--------------|-------------------------------------------------------------------------------------------------------------------------------------------------------------------------|
| <b>Kalimantan Selatan (Kalsel)</b> | Banjarmasin               | V            | Jl Merdeka-Jl Suprpto-Taman Kamboja-Jl RE Martadinata-Jl Teluk Tiram-Jl A Yani-Meratus Futsal-Jl Batu Piring-Jl Jahri Saleh                                             |
|                                    | Banjarbaru                | V [62]       | Jl A Yani-Jl STM-Jl Panglima Batur-Jl Indragiri _Jl Putri Junjung Buih; city park of Banjarbaru                                                                         |
|                                    | Pelaihari                 | V [63]       | Jl Jend Ahmad Yani-Jl Boejasin-Jl Prof Soepomo; community forest                                                                                                        |
|                                    | Martapura                 | F            | Alun-alun Martapura-Jl A Yani-Jl Pelabuhan-Jl Pangeran Abdurahman-Jl Mentari 4-Taman Albisia-Taman Lansia-Jl Tanjung Rama                                               |
| <b>Kalimantan Timur (Kaltim)</b>   | Kutai Barat               | [64]         | Menaliq Mt, Penarung county                                                                                                                                             |
|                                    | Kutai Timur               | [65]         | Community forest                                                                                                                                                        |
|                                    | Paser                     | [65]         | Community forest                                                                                                                                                        |
|                                    | Samarinda                 | V            | Jl RE Martadinata-Taman Mahakam-Jl Gajah Mada-Jl Semeru-Taman Samparendah-Jl Basuki Rahmat-GOR Segiri-Jl P Antasari-Jl A Yani-Jl Pranoto                                |
|                                    | Tenggarong                | V            | Jl Naga-Jl Pesut-Jl Karang Mumus-Taman BJ Tenggarong-Jl Ukuk Dalam-Jl Mangkunegara-Jl A Yani-Jl S Parman                                                                |
|                                    | Bontang                   | V            | Lap Bessai-Jl Dewi Sartika-Jl Mulawarman-Jl Awang Long-Jl A Yani-Jl Sudirman-Jl Pelabuhan-Park Bontang Kuala-Taman Adipura-Jl Thamrin-Pantai Bontang                    |
|                                    | Tanjungredep              | V            | Jl Bulungan-Jl Kuran-Jl Marsma Iswahyudi-Jl HRM Ayoeb-Airport-Jl HM Isa III-Jl Dr Murjani III-Jl Gunung Panjang-Jl Sultan Agung-Jl Raja Aslan-Jl Prapatan-Taman Cendana |
|                                    | Balikpapan                | V            | Jl DI Panjaitan-Jl Sutomo-Jl A Yani-Pantai Kemela-Lap Merdeka-Taman Bakapi                                                                                              |
| <b>Kalimantan Utara (Kaltara)</b>  | Malinau                   | V            | Jl A Yani-Kantor Pemda-Masjid Agung-SPBU Pertamina-Jl Pandita-Jl Antasari Raya                                                                                          |
|                                    | Kota Tarakan              | V            | Juwata Airport-Jl Jend Sudirman-Jl Kusuma Bangsa-Taman Belabuh-Jl Yos SUDarso-Jl Mulawarman-Jl Slamet Riadi-Jl Anggresk-Park Marcong                                    |
|                                    | Nunukan                   | V            | Pelabuhan-Alun-alun kota-Tugu Dwikora-Kantor Bupati                                                                                                                     |
|                                    | Tanjungselor              | V            | Jl A Yani-Jl Jelarai-Jl S Parman-Jl Serindit-Jl Kol Sutaji-Jl Sekip II-Jl Sekip I                                                                                       |
| <b>Sulawesi Selatan (Sulsel)</b>   | Makassar                  | [66-67]      | Roadside Makasar city, Moccini Sombala park                                                                                                                             |
|                                    | Parepare                  | [68]         | City forest                                                                                                                                                             |
|                                    | Barru                     | F            | Jl Pangkajene Barru-Jl Poros-Jl Abdul Muis-Jl AP Pettarani-Alun alun-Jl Jend Sudirman-Lapangan Sumpang Binangae-Jl Anggrek                                              |
|                                    | Maros                     | F            | Jl Poros Palopo-Jl Daya Maros-Jl Taqwa-Jl Vetran                                                                                                                        |
| <b>Sulawesi Tenggara (Sultra)</b>  | Kendari                   | [69]         | Baruga urban forest                                                                                                                                                     |
|                                    | Bau-Bau                   | V            | Jl Betoambari, Jl Bataraguru, Jl Wawokia, Taman Palagimata, Patung Ekor Naga, Jl A Yani                                                                                 |
|                                    | Muna                      | V            | Alun-alun Raha, Pirla Raha, Pasar Labora                                                                                                                                |
|                                    | Konawe sel                | V            | Jl Andolo, Jl Laeya, Jl Poros Kendari Andolo-Palangga                                                                                                                   |
| <b>Sulawesi Barat (Sulbar)</b>     | Majene                    | V [70]       | Jl Amana Wewang-Banggae, Jl Poros Majene-Mamuju, Jl Gatot Subroto-Pangaliali, SPBU-Totoli; District vegetation analysis                                                 |

| Province                         | City/Municipality/Regency | Data source* | Road segment/park**                                                                                                               |
|----------------------------------|---------------------------|--------------|-----------------------------------------------------------------------------------------------------------------------------------|
|                                  | Mamasa                    | V [70]       | Jl Sepanjang Sungai, Kantor Bupati, Jl Patung Bunda Maria; District vegetation analysis                                           |
|                                  | Mamuju                    | V [70]       | Taman Kantor Bupati-Taman Karema- Masjid Raya Suhada; District vegetation analysis                                                |
|                                  | Poso                      | V            | Taman kota, Jl Pulau Sumatera, Alun-alun Sintuwu Maroso-Gerbang Rejo, Poso green park, Kawua-Jl Diponegoro                        |
| <b>Sulawesi Tengah (Sulteng)</b> | Palu                      | V            | Stadion Gawalise, Taman Dato Krama Lere-Lab Vaulema, Dinas PU-Jl Prof Yamin                                                       |
|                                  | Kota Donggala             | V [71]       | Taman kota, Jl Poros Palu-Mamuju; riverside of Kaili village                                                                      |
|                                  | Kota Manado               | V            | Taman Kesatuan Bangsa, Stadion Klabat, Malalayang-Jl Walter Mongisidi, Jl 17 Agustus-Wanea, Bandara Sam Ratulangi                 |
| <b>Sulawesi Utara (Sulut)</b>    | Tondano-Minahasa          | V            | Park city-Toun Keramber/Kantor Bupati, Jl Diponegoro, Jl Wawalintouan, Jl Koya air panas                                          |
|                                  | Lolak-Bolangmongondou     | V            | Kantor Bupati, Jl Trans Sulawesi                                                                                                  |
|                                  | Kota Gorontalo            | V            | Lap Taruma, Jl Nani Wartabore, Taman Lalu Hotel, Telaga Park, Jl Raja Eyote, Masjid Darussalam                                    |
| <b>Gorontalo</b>                 | Marisa- Pohuwatu          | V            | Lap Ormas Marisa, Jl Trans Sulawesi, Pantai Pohon Cinta, Tugu Pamea                                                               |
|                                  | Kwandang-Gorontalo Utara  | V            | Jl Trans Sulawesi, Jl Dambola-Kwandang, Jl Maheo-Kwandang, Jl Pantolo Indah-batas kota                                            |
|                                  | Ambon                     | V [72]       | Lapangan Merdeka-Monumen Perdamaian-Jl Kakialy-Jl Rijali-Jl Dr Siwabessy-Jl Said Perintah-Jl Sultan Hairun; Agroforestry in Ambon |
| <b>Maluku</b>                    | Tual                      | V            | Jl Dullah Raya-Ngadi-Taman Kota Tual-Jl Dr Leimena-Jl Sukarno Hatta-Jl Trikora                                                    |
|                                  | Masohi                    | [73]         | Estate plantation                                                                                                                 |
|                                  | Piru-Seram                | [74-75]      | Conservation forest Marsegu island; Flora of western Seram                                                                        |
|                                  | Ternate                   | [76]         | Natural forest of Ternate island                                                                                                  |
| <b>Maluku Utara (Malut)</b>      | Tobelo                    | V [77]       | Monumen Nusantara-Kantor Bupati-Stadion-Jl Galela-Jl Kemakmuran; medicinal plant of community of Tobelo Dalam                     |
|                                  | Sofifi-Kota Tidore        | V            | Jl Topo-Jl Hija-Jl Nasional-Jl Trans Halmahera                                                                                    |
|                                  | Jailolo                   | V            | Jl Kesultanan-Masjid Gammalamo-Gereja Maranatha-Kantor Pos Jailolo-Jl Pelabuhan                                                   |
|                                  | Timika-Mimika             | V            | Jl Soponyono-Jl Hasanuddin-Jl BUdiutomo-Jl Cenderawasih-Jl Megantara-Jl Yos Sudarso-JL A Yani-Rimba Papua Hotel                   |
| <b>Papua</b>                     | Merauke                   | V            | Taman Mandala-Libra-Lingkar Brawijaya-Masjid Al Aqso-Jl Brawijaya-Mopah-Jl Garuda Spadem-SMAN 2 Merauke                           |
|                                  | Sentani                   | V            | Airport-Jl Kemiri-Hinekombe-Jl Kehiran Dobonsu-Jl Yelim-Jl Sentani-Waena-Jl Abepura-Sentani                                       |
|                                  | Kota Jayapura             | F            | Jl Adipura-Jl Kotti-Jl Tasangkapura; Jl Samratulangi-Jl Soasiu-Jl Trikora; Jl Diponegoro-Jl Soetomo                               |
|                                  | Wamena                    | V [78-79]    | Jl Pattimura-Jl Yos Sudarso; food crop of Papua; Useful plant of Dani ethnic                                                      |
|                                  | Biak                      | V [78]       | Jl Majapahit-Jl Goa Jepang; food crop of Papua                                                                                    |
|                                  | Karubaga                  | [78]         | Food crop of Papua                                                                                                                |
|                                  |                           |              |                                                                                                                                   |

| Province                         | City/Municipality/Regency | Data source* | Road segment/park**                                                                                                              |
|----------------------------------|---------------------------|--------------|----------------------------------------------------------------------------------------------------------------------------------|
|                                  | Sarmi                     | [78, 80-81]  | Food crop of Papua; Community forest of Kampung Sewan                                                                            |
| <b>Papua Barat</b>               | Manokwari                 | V            | Sowi-Jl Esau Sesa-Jl Trikora-Wosi-Jl Gunung Salju                                                                                |
|                                  | Sorong                    | V [82]       | Bukit Sorong-Kp Baru; Vegetation analysis in Tambraw                                                                             |
|                                  | Fak-fak                   | V [83]       | Pasar Thumburuni-Jl Yos Sudarso-Jl Selosa Namudat; Pasir Putih Satu beach                                                        |
|                                  | Kaimana                   | V            | Taman Kota-Masjid Baiturrahman-SMAN 1-SMP Yapis-Hotel Bicari-Kantor Peln-Trikora                                                 |
|                                  | Bintuni                   | V            | Masjid Kota-Tugu Bangkit-Jl Utama-Taman Kota Vidien                                                                              |
| <b>Bali</b>                      | Denpasar                  | V [84]       | Jl Hangtuah-Jl Puputan-Jl PB Sudirman-Jl Gn Agung-Jl Hayam Wuruk; City open green space                                          |
|                                  | Tabanan                   | V [85]       | Jl Dr Sukarno-Jl Mawar-Jl Gn Agung-Jl Pahlawan-Jl Gatot Subroto-Jl Ngurah Rai; Local fruit in Tabanan                            |
|                                  | Gianyar                   | V            | Lap Astina, Jl By pass Dama Giri, Stadium Timur, Gor Kebu Iwa-Taman Kota Ciung Wanara, Jal Astina Utara                          |
|                                  | Singaraja                 | V            | Taman kota-Jl Ngurah Rai, Lap Buana Putra-BPMD, Jl Ngurah Rai, Jl Sukasada-Panji, Jl Kibarak-Panji, Jl Laksamana                 |
|                                  | Negara-Jembrana           | V            | Taman Prasasti, Jl Gajahmada-Jl Ngurah Rai, Masjid Agung Baitul Qodim-Loloan Timur, Jl Pahlawan, Jl Nagara-Gilimanuk, Jl Udayana |
| <b>Nusa Tenggara Barat (NTB)</b> | Mataram                   | V [86]       | Jl Lingkar Selatan-Jl Arya Banjar Getas-Jl Majapahit-Jl Sriwijaya-Jl Brawijaya; road side in Mataram City                        |
|                                  | Praya-Lombok Tengah       | V            | Jl Bandara-Jl Gajahmada-Jl Raden Pugu-Jl Sudirman-Pelabuhan Lembor-Jl Mandalika-Bandara                                          |
|                                  | Sumbawa Besar-Sumbawa     | V            | Taman Kerato-Jl Garuda-Pasar                                                                                                     |
|                                  | Kota Bima                 | V            | Lap Surasuba-Taman Ria Kota                                                                                                      |
|                                  | Dompu                     | V            | Taman Kota-Jl Sukarno Hatta-Jl Syeh Mohamad-Jl Lingkar Utara-Pinggir Sungai                                                      |
| <b>Nusa Tenggara Timur (NTT)</b> | Kupang                    | V [87-88]    | Jl Adisucipto-Jl Prof Dr Herman Johanes-Jl Timur Raya-Jl A Yani-Jl Cak Doko-Jl Frans Seda; road side                             |
|                                  | Alor                      | [89]         | Vegetation analysis Alor island                                                                                                  |
|                                  | Sikka                     | [90]         | Food crops of Blidit county, Egon-Waigette                                                                                       |
|                                  | Belu                      | [91]         | Catchment area of Talau                                                                                                          |
|                                  | Way Kabubak-Sumba Barat   | F            | Jl Ahmad Yani-Jl Bayangkara-Jl Sudirman-Jl Basuki Rahmat-Pasar-Jl Weekaro-Jl Ring Road-Taman Mamuli                              |
|                                  | Tambolaka                 | F            | Jl Lukas Dairo Billi-Jl Raya Yohanes Ngongo Bani-Jl Rangga Roko Indah-Pemda                                                      |
|                                  | Manggarai                 | [92-93]      | Taman Wisata Alam Ruteng                                                                                                         |

\* V—Instant Google Street View; F—direct field survey, [ ]—from literature study; \*\* “Jl” means street, “Taman” means park
