# Supplementary material
Source: MDPI journal article supplement (https://www.mdpi.com/2071-1050/13/14/7835)
Supplement: s1 [file s1 › Table S2 Revision-edited.xlsx]

## Sheet: Hazard Assessment
Table S2. Scoring values of fruit species for hazard assessment.
No.	Species	[Family]	[Common]	[Indonesian]	Fruit size					Hard fruit					Fruit has thorns					Fruit hidden in canopy					Mature fruit drop rate					Rolling of dropped fruit					Fallen leaves cause injury					Stem has spiny thorns					Canopy has spiny thorns
					small (<10 cm)	medium (10-15 cm)	large (>15 cm)	Score		Soft	Medium (easy to break)	Hard (thick)	Score		No	Slightly	Very sharp	Score		Stem	Canopy	canopy& stem	Score		Low	Medium	High	score		No	Rolling <2 m	Rolling > 2 m	Score		No	Not serious	Very serious	Score		No	Mild	Sharp	Score		No	Mild	Sharp	Score
					1	3	5			1	3	5			1	3	5			1	3	5			1	3	5			1	3	5			1	3	5			1	3	5			1	3	5
	IDENTIFIED IN CITIES
1	Aegle marmelos (L.) Corr.	Rutaceae	Bael	Buah maja legi		1		3				1	5		1			1			1		3		1			1				1	5		1			1				1	5			1		3
2	Aleurites moluccanus (L.) Willd.	Euphorbiaceae	candlenuts	kemiri, muncang	1			1				1	5		1			1			1		3			1		3				1	5		1			1		1			1		1			1
3	Anacardium occidentale L.	Anacardiaceae	cashew nut	jambu mete, jambu monyet	1			1		1			1		1			1			1		3			1		3			1		3		1			1		1			1		1			1
4	Ananas comosus (L.) Merr.	Bromeliaceae	pineapple	nanas			1	5			1		3				1	5		1			1		1			1		1			1		1			1				1	5				1	5
5	Annona glabra L.	Annonaceae	pond apple, Aligator apple	Serba rasa		1		3		1			1		1			1			1		3			1		3			1		3		1			1		1			1		1			1
6	Annona muricata L.	Annonaceae	soursop	sirsak, nangka sabrang, nangka londo			1	5		1			1		1			1			1		3			1		3		1			1		1			1		1			1		1			1
7	Annona reticulata L.	Annonaceae	custard apple, bull’s heart	buah nona, srikaya		1		3		1			1		1			1			1		3			1		3			1		3		1			1		1			1		1			1
8	Antidesma bunius (L.) Spreng.	Phyllanthaceae	bignai, Queensland-cherry	buni	1			1		1			1		1			1			1		3			1		3			1		3		1			1		1			1		1			1
9	Antidesma ghaesembilla Gaern	Phyllanthaceae		pune (parepare), mayam (kalsel)	1			1		1			1		1			1			1		3			1		3			1		3		1			1		1			1		1			1
10	Archidendron jiringa (Jack) I. C. Nielsen)	Fabaceae		jiringa, jengkol	1			1		1			1		1			1			1		3			1		3		1			1		1			1		1			1		1			1
11	Ardisia elliptica Thunb.	Primulaceae	shoebutton, inkberry	wuni, buni keraton, lempeni	1			1		1			1		1			1			1		3			1		3			1		3		1			1		1			1		1			1
12	Arenga pinnata (Wurmb.) Merr.	Arecaceae	sugar palm	aren, enau, kawung	1			1			1		3		1			1		1			1		1			1			1		3				1	5		1			1		1			1
13	Arthocarpus heterophyllus Lam.	Moraceae	jackfruit	nangka			1	5			1		3			1		3			1		3			1		3		1			1		1			1		1			1		1			1
14	Artocarpus altilis (Parkinson) Fosberg	Moraceae	breadfruit	sukun			1	5			1		3		1			1			1		3			1		3			1		3		1			1		1			1		1			1
15	Artocarpus camansi Blanco	Moraceae	breadnut	keluwih, kluwih			1	5			1		3		1			1			1		3			1		3			1		3		1			1		1			1		1			1
16	Artocarpus elasticus Reinw.	Moraceae		benda, tarok, teureup, tipulu, tarap			1	5			1		3		1			1			1		3			1		3			1		3		1			1		1			1		1			1
17	Artocarpus integer Spreng.	Moraceae		cempedak			1	5			1		3		1			1			1		3			1		3		1			1		1			1		1			1		1			1
18	Artocarpus rigidus Blume	Moraceae	monkey jackfruit	Tempunit			1	5			1		3		1			1			1		3			1		3		1			1		1			1		1			1		1			1
19	Averrhoa bilimbi L	Oxalidaceae		belimbing wuluh	1			1		1			1		1			1			1		3				1	5			1		3		1			1		1			1		1			1
20	Averrhoa carambola L.	Oxalidaceae	star fruit	belimbing		1		3		1			1		1			1			1		3				1	5		1			1		1			1		1			1		1			1
21	Baccaurea racemosa (Reinw.) Muell. Arg	Phyllanthaceae		menteng, kepundung	1			1		1			1		1			1		1			1			1		3			1		3		1			1		1			1		1			1
22	Baccaurea sp (B. macrocarpa)	Phyllanthaceae		menteng nagari, rabai, cupak, rambai	1			1		1			1		1			1		1			1			1		3			1		3		1			1		1			1		1			1
23	Bellucia pentamera Naudin	Melastomataceae		Jambu hutan, jambu tangkalak	1			1		1			1		1			1		1			1			1		3		1			1		1			1		1			1		1			1
24	Borassus aethiopum Mart.	Arecaceae	Afrikan fan palm, ron palm, toddy palm			1		3				1	5		1			1		1			1		1			1		1			1				1	5		1			1		1			1
25	Borassus flabellifer L.	Arecaceae	Palmyra palm, tala palm, toddy palm	siwalan, lontar, lontara, tala		1		3				1	5		1			1		1			1		1			1				1	5				1	5		1			1		1			1
26	Borassus heineanus Becc.	Arecaceae		Palem lontar irian		1		3				1	5		1			1		1			1		1			1				1	5				1	5		1			1		1			1
27	Bouea macrophylla Griffith	Anacardiaceae	marian plum	gandaria, ramania, jatake	1			1		1			1		1			1			1		3			1		3			1		3		1			1		1			1		1			1
28	Breynia cernua (Poir.) Mull.Arg. Mueller Argoviensis	Phyllanthaceae	breynia, coffee bush	tandangolu	1			1		1			1		1			1			1		3			1		3			1		3		1			1		1			1		1			1
29	Bruguiera gymnorrhiza Lamk	Rhizophoraceae		tanjang merah	1			1		1			1		1			1			1		3			1		3			1		3		1			1		1			1		1			1
30	Burckella obovata (G. Forst.) Pierre	Sapotaceae		Nyatoh, buah kaum, takun	1			1		1			1		1			1			1		3			1		3				1	5		1			1		1			1		1			1
31	Calophyllum soulattri Burm. f.	Calophyllaceae		Bintangor, ntorang, nyanyamplungan	1			1		1			1		1			1			1		3				1	5				1	5		1			1		1			1		1			1
32	Canarium commune L. *	Burseraceae	java almond, kenari nut	kenari, kenari Bogor	1			1				1	5		1			1			1		3			1		3				1	5		1			1		1			1		1			1
33	Canarium decumanum Gaertn.	Burseraceae		kenari Singkawang, kenay NTT	1			1				1	5		1			1			1		3			1		3				1	5		1			1		1			1		1			1
34	Carica papaya L	Caricaceae	papaya	pepaya			1	5		1			1		1			1		1			1			1		3		1			1		1			1		1			1		1			1
35	Castanopsis acuminatissima (Blume) A. DC	Fagaceae	papua oak	Ki riung anak, ki anak, riung anak, heye	1			1		1			1		1			1			1		3		1			1		1			1		1			1		1			1			1		3
36	Citrus aurantifolia (Christm.) Swingle	Rutaceae		Jeruk nipis	1			1		1			1		1			1			1		3			1		3			1		3		1			1		1			1			1		3
37	Citrus sinensis L. Osbeck	Rutaceae	sweet orange	jeruk manis	1			1		1			1		1			1			1		3			1		3			1		3		1			1		1			1		1			1
38	Citrus limon (L.) Burm.f.	Rutaceae	Lemon	Jeruk lemon, jeruk sitrun	1			1		1			1		1			1			1		3			1		3			1		3		1			1			1		3			1		3
39	Citrus grandis Osbeck	Rutaceae	pamelo	jeruk bali			1	5			1		3		1			1			1		3			1		3				1	5		1			1		1			1		1			1
40	Cocos nucifera	Arecaceae	coconut	kelapa			1	5				1	5		1			1		1			1			1		3				1	5				1	5		1			1		1			1
41	Coffea arabica L.	Rubiaceae	coffee	kopi	1			1			1		3		1			1			1		3		1			1			1		3		1			1		1			1		1			1
42	Coffea excelca L.	Rubiaceae		Kopi ekselsa	1			1			1		3		1			1			1		3		1			1			1		3		1			1		1			1		1			1
43	Crysophyllum cainito L.	Sapotaceae	star apple	kenitu, genitu		1		3		1			1		1			1			1		3			1		3				1	5		1			1		1			1		1			1
44	Cynometra cauliflora L.	Fabaceae		namu-namu, nam-nam, pukih	1			1		1			1		1			1		1			1			1		3		1			1		1			1		1			1		1			1
45	Dimorcarpus longan (Lour.) Steud	Sapindaceae	longan	kelengkeng, lengkeng	1			1		1			1		1			1			1		3		1			1				1	5		1			1		1			1		1			1
46	Diospyros blancoi A.DC.	Ebenaceae	velvet apple, mabolo	bisbul, sembolo		1		3		1			1		1			1			1		3			1		3				1	5		1			1		1			1		1			1
47	Diospyros kaki L.f	Ebenaceae	persimmon	kesemek, semek		1		3		1			1		1			1			1		3			1		3				1	5		1			1		1			1		1			1
48	Dracontomelon dao (Blanco) Merr. & Rolfe	Anacardiaceae	pacific walnut	rao, dahu, sengkuang	1			1		1			1		1			1			1		3			1		3				1	5		1			1		1			1		1			1
49	Durio acutifolius (Mast.) Kosterm	Bombacaceae		durian burung			1	5				1	5				1	5			1		3			1		3				1	5		1			1		1			1		1			1
50	Durio dulcis Becc	Bombacaceae		lai			1	5				1	5				1	5			1		3			1		3				1	5		1			1		1			1		1			1
51	Durio kutejensis (Hassk.) Becc.	Bombacaceae		lahung, durian merah			1	5				1	5				1	5			1		3			1		3				1	5		1			1		1			1		1			1
52	Durio oxleyanus Griffith	Bombacaceae		karantungan			1	5				1	5				1	5			1		3			1		3				1	5		1			1		1			1		1			1
53	Durio zybethinus	Bombacaceae	durian	durian			1	5				1	5				1	5			1		3			1		3				1	5		1			1		1			1		1			1
54	Enterolobium cyclocarpum (Jacq.) Griseb.	Fabaceae	guanacaste, elephant-ear tree	sengon buto	1			1		1			1		1			1			1		3		1			1		1			1		1			1		1			1		1			1
55	Eriobotrya japonica (Thunb.) Lindl.	Rosaceae	loquat	biwa, lokat, loukat	1			1		1			1		1			1			1		3			1		3			1		3		1			1		1			1		1			1
56	Elaeocarpus floribundus Bl.	Elaeocarpaceae		Damu	1			1		1			1		1			1			1		3			1		3			1		3		1			1		1			1		1			1
57	Elaeocarpus sphaericus (Gaertn.) K. Schum)	Elaeocarpaceae	rudraksha	ninto	1			1		1			1		1			1			1		3			1		3			1		3		1			1		1			1		1			1
58	Elattostachys verrucosa (Blume) Radlk.	Sapindaceae		lowe api	1			1		1			1		1			1			1		3			1		3			1		3		1			1		1			1		1			1
59	Eugenia uniflora Lam	Myrtaceae	pitanga	dewandaru	1			1		1			1		1			1			1		3			1		3			1		3		1			1		1			1		1			1
60	Ficus carica	Moraceae	Fig tree	Buah tin	1			1		1			1		1			1			1		3			1		3			1		3		1			1		1			1		1			1
61	Ficus racemosa L	Moraceae	Indian fig tree	loa, elo	1			1		1			1		1			1		1			1			1		3			1		3		1			1		1			1		1			1
62	Ficus variegata Blume	Moraceae	red stem fig	ara, gondang, nyawai	1			1		1			1		1			1		1			1		1			1			1		3		1			1		1			1		1			1
63	Ficus fistulosa Reinw	Moraceae		Labe, benying, beunying , ai yumbul	1			1		1			1		1			1		1			1		1			1			1		3		1			1		1			1		1			1
64	Ficus fulva Reinw. ex Bl.	Moraceae		Lento, hamerang minyak, kebeg lenga	1			1		1			1		1			1				1	5		1			1			1		3		1			1		1			1		1			1
65	Ficus punctata Thunb.	Moraceae		Menca, ki batara	1			1		1			1		1			1		1			1		1			1			1		3		1			1		1			1		1			1
66	Flacourtia inermis Roxb.	Salicaceae	batoko plum	lobi lobi	1			1		1			1		1			1			1		3		1			1			1		3		1			1		1			1		1			1
67	Flacourtia rukam Zoll. & Moritzi	Salicaceae	rukam	rakem, rukem	1			1		1			1		1			1			1		3		1			1			1		3		1			1		1			1		1			1
68	Garcinia celebica L.	Clusiaceae	seashore mangosteen	baros, kalawet, mangggis hutan	1			1		1			1		1			1			1		3		1			1			1		3		1			1		1			1		1			1
69	Garcinia dulcis (Roxb.) Kurz	Clusiaceae	yellow mangosteen	mundu, badung	1			1		1			1		1			1			1		3			1		3			1		3		1			1		1			1		1			1
70	Garcinia mangostana L	Clusiaceae	mangosteen	manggis		1		3			1		3		1			1			1		3			1		3				1	5		1			1		1			1		1			1
71	Garcinia xanthochymus Hook. f. ex T. Anders	Clusiaceae		asam kandis, asam gelugur	1			1		1			1		1			1			1		3			1		3				1	5		1			1		1			1		1			1
72	Gnetum gnemon Linn. *	Gnetaceae	gnetum seed	melinjo, belinjo	1			1			1		3		1			1			1		3			1		3				1	5		1			1		1			1		1			1
73	Hylocereus undatus (Haworth) Britton & Rose	Cactaceae	dragon fruit, pitaya	buah naga		1		3		1			1		1			1			1		3		1			1		1			1			1		3			1		3				1	5
74	Inga feuileei DC	Fabaceae		Buah es	1			1			1		3		1			1			1		3			1		3			1		3		1			1		1			1		1			1
75	Inocarpus edulis Forst	Fabaceae	Tahitian chesnut	gayam, gayang	1			1		1			1		1			1			1		3			1		3		1			1		1			1		1			1		1			1
76	Lannea coromandelica (Houtt.) Merr.	Anacardiaceae	Indian ash tree, gurjon	kudo reo, kudo, reo,kedondong laki	1			1			1		3		1			1			1		3				1	5			1		3		1			1		1			1		1			1
77	Lansium domesticum Corr	Meliaceae	dokoo	duku	1			1		1			1		1			1			1		3		1			1				1	5		1			1		1			1		1			1
78	Lansium parasiticum (Osbeck) K.C. Sahni & Bennet	Meliaceae		langsat, langsep, kokosan	1			1		1			1		1			1			1		3		1			1				1	5		1			1		1			1		1			1
79	Laucaena leucocephala (Lam.) de Wit	Fabaceae	river tamarind	mlanding, kemlandingan	1			1		1			1		1			1			1		3		1			1		1			1		1			1		1			1		1			1
80	Leea indica (Burm.f) Merr.	Vitaceae	bandicoot berry	Girang, ki tuwa, kayu tuwa, temali laki	1			1		1			1		1			1			1		3			1		3			1		3		1			1		1			1		1			1
81	Litchi chinensis Sonn.	Sapindaceae	lychee	leci	1			1		1			1		1			1			1		3		1			1				1	5		1			1		1			1		1			1
82	Litsea resinosa Blume	Lauraceae		medang bedaka	1			1		1			1		1			1			1		3				1	5				1	5		1			1		1			1		1			1
83	Mangifera applanata Kosterm	Anacardiaceae		Asem depah, asem kepeng, pelipisan	1			1		1			1		1			1			1		3			1		3				1	5		1			1		1			1		1			1
84	Mangifera caesia Jack ex Wall.	Anacardiaceae	machang	wani Bali, mangga binjai		1		3			1		3		1			1			1		3			1		3				1	5		1			1		1			1		1			1
85	Mangifera casturi Kosterm	Anacardiaceae	casturi mango	mangga kasturi, kesturi		1		3			1		3		1			1			1		3			1		3				1	5		1			1		1			1		1			1
86	Mangifera foetida Lour	Anacardiaceae	horse mango	limus, bacang, embacang		1		3			1		3		1			1			1		3			1		3				1	5		1			1		1			1		1			1
87	Mangifera indica L.	Annacardiaceae	mango	mangga		1		3			1		3		1			1			1		3			1		3				1	5		1			1		1			1		1			1
88	Mangifera laurina Blume	Annacardiaceae		Mangga hutan, mangga pari		1		3			1		3		1			1			1		3			1		3				1	5		1			1		1			1		1			1
89	Mangifera pajang Kosterm.	Anacardiaceae		mangga pajang, bambangan		1		3			1		3		1			1			1		3			1		3				1	5		1			1		1			1		1			1
90	Mangifera sp.	Annacardiaceae		Mangga hitam, mangga wulung		1		3			1		3		1			1			1		3			1		3				1	5		1			1		1			1		1			1
91	Mangifera kamanga Blume	Anacardiaceae		kemang		1		3			1		3		1			1			1		3			1		3				1	5		1			1		1			1		1			1
92	Mangifera x odorata Griffith	Anacardiaceae		kwini, kweni, kuwini		1		3			1		3		1			1			1		3			1		3				1	5		1			1		1			1		1			1
93	Manilkara kauki (L.) Duby (Sapot)	Sapotaceae		sawo kecik	1			1			1		3		1			1			1		3			1		3				1	5		1			1		1			1		1			1
94	Manilkara zopota L.	Sapotaceae	sapodilla	sawo	1			1			1		3		1			1			1		3		1			1				1	5		1			1		1			1		1			1
95	Medinilla speciosa Reinw. ex Blume	Melastomataceae		trijata, parijotho	1			1		1			1		1			1			1		3		1			1			1		3		1			1		1			1		1			1
96	Mimusops elengi Linn	Sapotaceae		tanjung	1			1		1			1		1			1			1		3			1		3				1	5		1			1		1			1		1			1
97	Morinda citrifolia L	Rubiaceae	Morinda	mengkudu, pace		1		3		1			1		1			1			1		3			1		3				1	5		1			1		1			1		1			1
98	Morus indica L	Moraceae	mulberry	murbei, arbei	1			1		1			1		1			1			1		3		1			1		1			1		1			1		1			1		1			1
99	Muntingia calabura L.	Muntingiaceae	calabur tree	kersen, talok	1			1		1			1		1			1			1		3		1			1			1		3		1			1		1			1		1			1
100	Musa paradisiaca L	Musaceae	banana	pisang		1		3		1			1		1			1		1			1		1			1		1			1		1			1		1			1		1			1
101	Myristica argantea Warb	Myristicaceae		pala fakfak, pala papua	1			1			1		3		1			1			1		3			1		3				1	5		1			1		1			1		1			1
102	Myristica fatua Houtt *	Myristicaceae	wild nutmeg	pala utan, mendarahan	1			1			1		3		1			1			1		3			1		3				1	5		1			1		1			1		1			1
103	Myristica fragrans Houtt *	Myristicaceae	nutmeg	pala, pala banda	1			1			1		3		1			1			1		3			1		3				1	5		1			1		1			1		1			1
104	Nephelium lappaceum L.	Sapindaceae		rambutan	1			1		1			1		1			1			1		3		1			1				1	5		1			1		1			1		1			1
105	Nephelium mutabile Blume	Sapindaceae		kapulasan, rambutan botak	1			1		1			1		1			1			1		3		1			1				1	5		1			1		1			1		1			1
106	Palaquium leiocarpum Boerl.	Sapotaceae		jongkang, hangkang, nyatoh jangkar	1			1		1			1		1			1			1		3			1		3				1	5		1			1		1			1		1			1
107	Palaquium obovatum(Griff.) Engl.	Sapotaceae		Kempo, osi	1			1		1			1		1			1			1		3			1		3			1		3		1			1		1			1		1			1
108	Pandanus brossimos Merr. & Perry	Pandanaceae		Kelapa hutan, woromo, tuke		1		3		1			1		1			1		1			1		1			1			1		3			1		3		1			1			1		3
109	Pandanus conoideus Lam	Pandanaceae	Red fruit	buah merah, saik-eken		1		3		1			1		1			1		1			1		1			1			1		3			1		3		1			1			1		3
110	Pandanus julianettii Mart.	Pandanaceae		Kelapa hutan, gawen, tuke, saluke		1		3		1			1		1			1		1			1		1			1			1		3			1		3		1			1			1		3
111	Pangium edule Reinw.	Achariaceae		picung, pucung, klewek, kalawak	1			1			1		3		1			1			1		3		1			1				1	5		1			1		1			1		1			1
112	Parkia speciosa Hassk *	Fabaceae		petai		1		3		1			1		1			1			1		3		1			1		1			1		1			1		1			1		1			1
113	Parkia javanica Lam	Fabaceae		kedaung, kedhawung		1		3		1			1		1			1			1		3		1			1		1			1		1			1		1			1		1			1
114	Passiflora edulis Sims.	Passifloraceae	passion fruit	buah negri	1			1			1		3		1			1			1		3		1			1				1	5		1			1		1			1		1			1
115	Passiflora lingularis L.	Passifloraceae	passion fruit	markisa		1		3			1		3		1			1			1		3		1			1				1	5		1			1		1			1		1			1
116	Persea americana Mill	Lauraceae	avocado	alpokat		1		3		1			1		1			1			1		3			1		3				1	5		1			1		1			1		1			1
117	Phoenix canariensis	Arecaceae		Kurma kenari	1			1		1			1		1			1		1			1		1			1				1	5				1	5		1			1				1	5
118	Phoenix dactylifera	Arecaceae		Kurma	1			1		1			1		1			1		1			1		1			1				1	5				1	5		1			1				1	5
119	Phylanthus acidus (L.) Skeells	Phyllanthaceae	star bery	ceremai, cermai	1			1		1			1		1			1			1		3		1			1			1		3		1			1		1			1		1			1
120	Phylantus emblica L.	Phyllanthaceae	emblic, amla, gooseberry	malaka, mloko, kemloko	1			1		1			1		1			1			1		3		1			1			1		3		1			1		1			1		1			1
121	Pithecelobium dulce (Roxb.) Benth	Fabaceae	manila tamarind	asam keranji	1			1		1			1		1			1			1		3		1			1		1			1		1			1		1			1		1			1
122	Pometia pinnata J. R & G. Forst	Sapindaceae	Fijian longan	matoa, kasai, kaili, tawang	1			1		1			1		1			1			1		3		1			1				1	5		1			1		1			1		1			1
123	Pometia tomentosa T & B	Sapindaceae		lengsir	1			1		1			1		1			1			1		3		1			1				1	5		1			1		1			1		1			1
124	Pouteria caimito Radlk.	Sapotaceae	abiu	sawo mangga		1		3		1			1		1			1			1		3			1		3				1	5		1			1		1			1		1			1
125	Pouteria campechiana Baehni	Sapotaceae	canistel, yellow sapote	alkesa, kanistel		1		3		1			1		1			1			1		3		1			1				1	5		1			1		1			1		1			1
126	Prunus arborea (Blume) Kalkman	Rosaceae		Kenda, akil, jenteli, kalana, hokio	1			1		1			1		1			1			1		3		1			1			1		3		1			1			1		3			1		3
127	Prunus avium L.	Rosaceae	sweet cherry	ceri burung	1			1		1			1		1			1			1		3		1			1			1		3		1			1			1		3			1		3
128	Psidium guajava Linn.	Myrtaceae	guava	jambu biji		1		3			1		3		1			1			1		3		1			1				1	5		1			1		1			1		1			1
129	Punica granatum L.	Lythraceae	pomegranate	delima		1		3			1		3		1			1			1		3		1			1				1	5		1			1			1		3				1	5
130	Rubus moluccanus L	Rosaceae	rubus	rubus, ucen maluku	1			1		1			1		1			1			1		3		1			1			1		3		1			1				1	5			1		3
131	Salacca zalacca	Arecaceae	snake fruit	salak	1			1			1		3			1		3		1			1		1			1				1	5				1	5				1	5				1	5
132	Sandorium koetjape (Burm.f.) Merr.	Meliaceae	santol	kecapi, sentul	1			1		1			1		1			1			1		3			1		3				1	5		1			1		1			1		1			1
133	Sararanga sinuosa Hemsley	Pandanaceae		anggur papua, selre	1			1		1			1		1			1		1			1		1			1			1		3			1		3		1			1				1	5
134	Schleichera oleosa (Lour.) Oken	Sapindaceae	gum-lac tree	kesambi, kosambi, sirlak	1			1		1			1		1			1			1		3			1		3				1	5		1			1		1			1		1			1
135	Scorodocarpus borneensis (Baill.) Becc	Olacaceae		kulim, kayu bawang, bawang hutan	1			1		1			1		1			1			1		3			1		3		1			1		1			1		1			1		1			1
136	Solanum betaceum Cav.	Solanaceae	tamarillo	terong belanda,terong mener	1			1		1			1		1			1			1		3			1		3				1	5		1			1		1			1		1			1
137	Spondias dulcis L.	Anacardiaceae	ambarela	kedondong liar, kedondong kecil	1			1			1		3		1			1			1		3			1		3				1	5		1			1		1			1		1			1
138	Spondias pinnata (L.f.) Kurz	Anacardiaceae	hog plum, wild mango	kedondong, dondong		1		3			1		3		1			1			1		3			1		3				1	5		1			1		1			1		1			1
139	Stelechocarpus burahol (Blume) Hook F & Thomson	Anacardiaceae		kepel, burahol	1			1			1		3		1			1		1			1			1		3				1	5		1			1		1			1		1			1
140	Sterculia shillinglawii F.Muell	Malvaceae	wild almond tree	woton, kelumpang, pinpin	1			1			1		3		1			1			1		3			1		3		1			1		1			1		1			1		1			1
141	Syzygium aqueum Burm F	Myrtaceae	rose apple	jambu air	1			1		1			1		1			1			1		3				1	5			1		3		1			1		1			1		1			1
142	Syzygium cumini (L.) Skeels	Myrtaceae	java plum	jamblang, duwet, jambu kalang	1			1		1			1		1			1			1		3			1		3			1		3		1			1		1			1		1			1
143	Syzygium cymosum (Lam.) DC.	Myrtaceae		jambu kopo, mantingan, kisireum	1			1		1			1		1			1			1		3			1		3			1		3		1			1		1			1		1			1
144	Syzygium jambos Linn.	Myrtaceae	rose apple	jambu mawar	1			1		1			1		1			1			1		3			1		3			1		3		1			1		1			1		1			1
145	Syzygium mallaccense (L.) Merr. & Perry	Myrtaceae	malay apple	jambu bol, jambu dersono		1		3		1			1		1			1			1		3			1		3			1		3		1			1		1			1		1			1
146	Syzygium laxiflorum	Myrtaceae		mpui, merik	1			1		1			1		1			1			1		3			1		3			1		3		1			1		1			1		1			1
147	Syzygium polycephalum (Mig.) Merr & Perry	Myrtaceae		gowok, kupa, kali asem, ruruhi	1			1		1			1		1			1		1			1			1		3				1	5		1			1		1			1		1			1
148	Tamarindus indica L **	Fabaceae	tamarind	asem jawa	1			1		1			1		1			1			1		3			1		3		1			1		1			1		1			1		1			1
149	Theobroma cacao L. **	Malvaceae	cocoa	kakao, coklat		1		3			1		3		1			1				1	5			1		3			1		3		1			1		1			1		1			1
150	Triphasia trifolia	Rutaceae	Lime berry	jeruk kinkit merah	1			1		1			1		1			1			1		3			1		3			1		3		1			1			1		3			1		3
151	Ziziphus mauritiana Lam.	Rhamnaceae	jujube	bidara, widara, kom	1			1		1			1		1			1			1		3			1		3			1		3		1			1				1	5				1	5
	NOT IDENTIFIED IN CITIES
1	Aceratium oppositifolium DC	Eleocarpaceae		belimbing hutan, kariala	1			1		1			1		1			1			1		3			1		3				1	5		1			1		1			1		1			1
2	Adansonia digitata Linn.	Malvaceae	baobabs	Asam belanda			1	5			1		3		1			1			1		3			1		3			1		3		1			1		1			1		1			1
3	Castanea sativa Mill.	Fagaceae	chesnut	kastanya, kuri	1			1		1			1				1	5			1		3		1			1		1			1		1			1		1			1		1			1
4	Castanopsis javanica (Blume) A.DC	Fagaceae	javan chesnut-oak	saninten	1			1		1			1				1	5			1		3		1			1		1			1		1			1		1			1		1			1
5	Cola acuminata (P.Beauv.) Schott et Endl.	Malvaceae	kola nuts	kola	1			1		1			1		1			1			1		3		1			1			1		3		1			1		1			1		1			1
6	Eugenia brasiliensis Lam.	Myrtaceae	grumichama	ceri, ceri hitam, ceri Brazil	1			1		1			1		1			1			1		3			1		3			1		3		1			1		1			1		1			1
7	Feronica lucida (Scheff.) Swingle	Rutaceae		kawista batu, kawista krikil	1			1		1			1		1			1			1		3			1		3				1	5		1			1			1		3				1	5
8	Limonia acidissima L.	Rutaceae	wood apple	kawista	1			1		1			1		1			1			1		3			1		3			1		3		1			1		1			1				1	5
9	Malus domestica Borkh	Rosaceae	apple	apel		1		3		1			1		1			1			1		3			1		3				1	5		1			1		1			1		1			1
10	Parkia biglibosa (Jacq.) R.Br. ex G.Don *	Fabaceae	locust bean	peundey		1		3		1			1		1			1			1		3		1			1		1			1		1			1		1			1					1
11	Payena leerii (Teijsm. & Binn.) Kurz	Sapotaceae	guta perca	getah sundi, payena, getah sontek	1			1		1			1		1			1			1		3		1			1			1		3		1			1		1			1		1			1
	Note: VL—very low; L—low; M—medium.
[truncated: 8 more columns]
