# Supplementary material
Source: MDPI journal article supplement (https://www.mdpi.com/2071-1050/13/14/7835)
Supplement: s1 [file s1 › Table S3 Revision-edited.xlsx]

## Sheet: City characteristics
Table S3. City characteristics in relation to fruit species.
No.	City name	Municipality/Regency name	Province	Island	Java (1=Java; 2=Outside Java)	Wallace's Line (1=western, 2=eastern)	Smart city (1=smart; 2=no)	Coastal city (1=yes, 0=no)	Large river in the city (1=yes, 0=no)	Altitude (1: <600 m, 2: >600 m asl)	Climate group (1=A, 2=B, 3=C, 4=D, 5=E, 6=F, 7=G)	Climate plus altitude	Population (1=megapolitan, 2=metropolitan, 3=large city, 4=medium city, 5=small city)	City vision (1=education, 2=touristic, 3=heritage, 4=culture, 5=commercial, 6=agriculture, 7=religious, 8=industry, 9=not determined)	Number of fruit species	Number of non-fruit species	Total species	Percentage fruit species
1	Rangkasbitung	Lebak	Banten	Java	Java	Western	2	0	1	1	2	LB	5	1	42	63	105	40
2	Pandeglang	Pandeglang	Banten	Java	Java	Western	2	1	0	1	1	LA	5	2	46	52	98	46.9388
3	Kota Cilegon	Kota Cilegon	Banten	Java	Java	Western	1	1	0	1	2	LB	4	8	33	56	89	37.0787
4	Serang	Serang	Banten	Java	Java	Western	2	0	0	1	2	LB	4	7	34	59	93	36.5591
5	Kota Tangerang	Kota Tangerang	Banten	Java	Java	Western	1	1	1	1	1	LA	3	8	24	47	71	33.8028
6	Kota Tangerangselatan	Kota Tangerangselatan	Banten	Java	Java	Western	1	0	1	1	1	LA	3	2	32	46	78	41.0256
7	Jakarta Pusat	Kota Jakarta Pusat	DKI	Java	Java	Western	1	0	1	1	1	LA	1	5	18	39	57	31.5789
8	Jakarta Utara	Kota Jakarta Utara	DKI	Java	Java	Western	2	1	1	1	3	LC	1	5	19	35	54	35.1852
9	Jakarta Barat	Kota Jakarta Selatan	DKI	Java	Java	Western	2	0	1	1	1	LA	1	5	23	39	62	37.0968
10	Jakarta Selatan	Kota Jakarta Timur	DKI	Java	Java	Western	2	0	1	1	1	LA	1	5	25	46	71	35.2113
11	Jakarta Timur	Kota Jakarta Barat	DKI	Java	Java	Western	2	0	1	1	1	LA	1	5	26	56	82	31.7073
12	Kota Bogor	Kota Bogor	Jawa Barat	Java	Java	Western	1	0	1	1	1	LA	3	2	45	59	104	43.2692
13	Depok	Kota Depok	Jawa Barat	Java	Java	Western	1	0	1	1	1	LA	3	4	35	44	79	44.3038
14	Bekasi	Bekasi	Jawa Barat	Java	Java	Western	1	0	0	1	3	LC	3	4	38	44	82	46.3415
15	Sukabumi	Sukabumi	Jawa Barat	Java	Java	Western	1	0	0	2	2	HB	4	4	30	44	74	40.5405
16	Cianjur	Cianjur	Jawa Barat	Java	Java	Western	2	0	0	1	1	LA	4	7	29	36	65	44.6154
17	Subang	Subang	Jawa Barat	Java	Java	Western	2	0	0	1	4	LD	5	6	29	42	71	40.8451
18	Bandung	Kota Bandung	Jawa Barat	Java	Java	Western	1	0	0	2	2	HB	2	2	20	60	80	25
19	Sumedang	Sumedang	Jawa Barat	Java	Java	Western	2	0	0	1	3	LC	5	6	33	39	72	45.8333
20	Majalengka	Majalengka	Jawa Barat	Java	Java	Western	2	0	0	1	3	LC	5	4	29	46	75	38.6667
21	Kota Cirebon	Kota Cirebon	Jawa Barat	Java	Java	Western	1	1	0	1	4	LD	3	3	22	51	73	30.137
22	Kuningan	Kuningan	Jawa Barat	Java	Java	Western	2	0	0	1	4	LD	5	2	29	39	68	42.6471
23	Tasikmalaya	Tasikmalaya	Jawa Barat	Java	Java	Western	2	0	0	1	3	LC	4	7	36	56	92	39.1304
24	Banjar	Kota Banjar	Jawa Barat	Java	Java	Western	2	0	0	1	2	LB	5	9	30	37	67	44.7761
25	Purwokerto	Banyumas	Jawa Tengah	Java	Java	Western	1	0	0	1	2	LB	4	4	29	44	73	39.726
26	Banjarnegara	Banjarnegara	Jawa Tengah	Java	Java	Western	2	0	1	1	2	LB	5	6	23	37	60	38.3333
27	Wonosobo	Wonosobo	Jawa Tengah	Java	Java	Western	1	0	0	2	3	HC	5	2	18	38	56	32.1429
28	Mungkid	Magelang	Jawa Tengah	Java	Java	Western	1	0	0	1	3	LC	4	7	16	39	55	29.0909
29	Cilacap	Cilacap	Jawa Tengah	Java	Java	Western	2	1	1	1	1	LA	4	8	19	39	58	32.7586
30	Kebumen	Kebumen	Jawa Tengah	Java	Java	Western	1	0	0	1	2	LB	5	2	27	34	61	44.2623
31	Kota Surakarta	Kota Surakarta	Jawa Tengah	Java	Java	Western	1	0	0	1	5	LE	3	4	46	74	120	38.3333
32	Kota Salatiga	Kota Salatiga	Jawa Tengah	Java	Java	Western	2	0	0	2	3	HC	4	3	35	59	94	37.234
33	Wonogiri	Wonogiri	Jawa Tengah	Java	Java	Western	2	0	0	1	3	LC	5	6	32	49	81	39.5062
34	Kota Tegal	Kota Tegal	Jawa Tengah	Java	Java	Western	2	1	1	1	4	LD	4	5	24	36	60	40
35	Batang	Batang	Jawa Tengah	Java	Java	Western	1	1	0	1	2	LB	5	5	22	37	59	37.2881
36	Purwodadi	Grobogan	Jawa Tengah	Java	Java	Western	1	0	1	1	3	LC	5	6	22	33	55	40
37	Kudus	Kudus	Jawa Tengah	Java	Java	Western	1	0	0	1	3	LC	4	3	22	48	70	31.4286
38	Kota Semarang	Kota Semarang	Jawa Tengah	Java	Java	Western	1	1	0	1	1	LA	2	5	25	49	74	33.7838
39	Demak	Demak	Jawa Tengah	Java	Java	Western	1	1	1	1	2	LB	5	7	25	36	61	40.9836
40	Jepara	Jepara	Jawa Tengah	Java	Java	Western	1	1	1	1	2	LB	4	7	20	53	73	27.3973
41	Rembang	Rembang	Jawa Tengah	Java	Java	Western	2	1	1	1	2	LB	5	6	33	42	75	44
42	Bantul	Bantul	DIY	Java	Java	Western	1	0	1	1	4	LD	4	1	37	49	86	43.0233
43	Wonosari	Gunung Kidul	DIY	Java	Java	Western	1	0	0	1	4	LD	5	1	33	42	75	44
44	Wates	Kulon Progo	DIY	Java	Java	Western	1	0	1	1	3	LC	5	1	34	45	79	43.038
45	Sleman	Sleman	DIY	Java	Java	Western	1	0	1	1	2	LB	4	1	33	57	90	36.6667
46	Kota Yogyakarta	Kota Yogyakarta	DIY	Java	Java	Western	1	0	1	1	4	LD	2	3	31	43	74	41.8919
47	Kepanjen	Malang	Jawa Timur	Java	Java	Western	2	0	1	1	4	LD	5	2	29	50	79	36.7089
48	Kota Surabaya	Kota Surabaya	Jawa Timur	Java	Java	Western	1	1	1	1	4	LD	2	5	23	58	81	28.3951
49	Kota Malang	Kota Malang	Jawa Timur	Java	Java	Western	1	0	0	1	3	LC	3	1	29	72	101	28.7129
50	Kota Probolinggo	Kota Probolinggo	Jawa Timur	Java	Java	Western	1	1	1	1	5	LE	4	7	32	48	80	40
51	Kota Madiun	Kota Madiun	Jawa Timur	Java	Java	Western	1	0	0	1	3	LC	4	5	29	43	72	40.2778
52	Kota Pasuruan	Kota Pasuruan	Jawa Timur	Java	Java	Western	1	1	1	1	6	LF	5	7	33	50	83	39.759
53	Tuban	Tuban	Jawa Timur	Java	Java	Western	1	1	0	1	4	LD	5	6	28	50	78	35.8974
54	Lamongan	Lamongan	Jawa Timur	Java	Java	Western	1	1	1	1	3	LC	5	2	22	46	68	32.3529
55	Bangil	Pasuruan	Jawa Timur	Java	Java	Western	1	1	1	1	3	LC	5	7	29	42	71	40.8451
56	Kraksan	Probolinggo	Jawa Timur	Java	Java	Western	1	1	1	1	4	LD	4	7	26	39	65	40
57	Banyuwangi	Banyuwangi	Jawa Timur	Java	Java	Western	1	1	1	1	2	LB	4	6	23	42	65	35.3846
58	Jember	Jember	Jawa Timur	Java	Java	Western	1	1	0	1	3	LC	4	2	25	44	69	36.2319
59	Ponorogo	Ponorogo	Jawa Timur	Java	Java	Western	2	0	0	1	4	LD	5	2	27	39	66	40.9091
60	Nganjuk	Nganjuk	Jawa Timur	Java	Java	Western	2	0	1	1	5	LE	5	2	29	51	80	36.25
61	Bangkalan	Bangkalan	Jawa Timur	Java	Java	Western	2	1	1	1	4	LD	5	6	34	47	81	41.9753
62	Sumenep	Sumenep	Jawa Timur	Java	Java	Western	1	1	1	1	3	LC	5	8	22	34	56	39.2857
63	Kota Banda Aceh	Kota Banda Aceh	Aceh	Sumatera	Outside Java	Western	1	1	0	1	4	LD	4	7	31	43	74	41.8919
64	Kota Langsa	Kota Langsa	Aceh	Sumatera	Outside Java	Western	2	1	0	1	3	LC	5	5	30
65	Kota Lhokseumawe	Kota Lhokseumawe	Aceh	Sumatera	Outside Java	Western	2	1	0	1	1	LA	4	5	11	28	39	28.2051
66	Tapaktuan	Aceh Selatan	Aceh	Sumatera	Outside Java	Western	2	1	0	1	1	LA	5	3	5
67	Meulaboh	Aceh Barat	Aceh	Sumatera	Outside Java	Western	2	1	1	1	1	LA	5	5	9	16	25	36
68	Kutacane	Aceh Tenggara	Aceh	Sumatera	Outside Java	Western	2	0	1	1	1	LA	5	4	3	9	12	25
69	Takengon	Aceh Tengah	Aceh	Sumatera	Outside Java	Western	2	0	1	2	1	HA	5	2	9	18	27	33.3333
70	Blangkejeren	Gayo Lues	Aceh	Sumatera	Outside Java	Western	2	0	1	2	5	HE	5	2	2	8	10	20
71	Pematangsiantar	Kota Pematangsiantar	Sumut	Sumatera	Outside Java	Western	2	0	0	1	1	LA	4	4	17	34	51	33.3333
72	Kota Medan	Kota Medan	Sumut	Sumatera	Outside Java	Western	1	0	0	1	1	LA	2	2	26	46	72	36.1111
73	Lubuk pakam	Deli Serdang	Sumut	Sumatera	Outside Java	Western	1	1	1	1	1	LA	4	3	28	26	54	51.8519
74	Kabanjahe	Karo	Sumut	Sumatera	Outside Java	Western	2	0	0	2	4	HD	5	2	17	31	48	35.4167
75	Balige	Toba Samosir	Sumut	Sumatera	Outside Java	Western	2	0	0	2	5	HE	5	3	23	32	55	41.8182
76	Sibuhuan	Padang Lawas	Sumut	Sumatera	Outside Java	Western	2	0	0	1	1	LA	5	2	23	27	50	46
77	Sipirok	Tapanuli Selatan	Sumut	Sumatera	Outside Java	Western	2	0	1	1	1	LA	5	5	31	38	69	44.9275
78	Panyambungan	Maindailing Natal	Sumut	Sumatera	Outside Java	Western	2	0	1	1	1	LA	5	7	25	37	62	40.3226
79	Pandan	Tapanuli Tengah	Sumut	Sumatera	Outside Java	Western	2	1	0	1	1	LA	5	2	21	26	47	44.6809
80	Padangsidempuan	Kota Padangsidempuan	Sumut	Sumatera	Outside Java	Western	2	0	1	1	1	LA	4	5	30	40	70	42.8571
81	Tebingtinggi	Kota Tebing Tinggi	Sumut	Sumatera	Outside Java	Western	2	0	0	1	1	LA	4	2	29	42	71	40.8451
82	Kota Padang	Kota Padang	Sumbar	Sumatera	Outside Java	Western	1	1	1	1	1	LA	3	4	29	22	51	56.8627
83	Kota Pariaman	Kota Pariaman	Sumbar	Sumatera	Outside Java	Western	2	1	1	1	1	LA	5	4	28	37	65	43.0769
84	Kota Solok	Kota Solok	Sumbar	Sumatera	Outside Java	Western	1	0	1	1	2	LB	5	6	27	43	70	38.5714
85	Pulau punjung	Darmasraya	Sumbar	Sumatera	Outside Java	Western	2	0	1	1	1	LA	5	5	31	44	75	41.3333
86	Lubuk basung	Agam	Sumbar	Sumatera	Outside Java	Western	2	0	1	1	1	LA	5	2	19	29	48	39.5833
87	Batu sangkar	Tanah Datar	Sumbar	Sumatera	Outside Java	Western	2	0	1	1	1	LA	5	4	27	37	64	42.1875
88	Painan	Pesisir Selatan	Sumbar	Sumatera	Outside Java	Western	2	1	1	1	1	LA	5	2	28	36	64	43.75
89	Simpang ampek	Pasaman Barat	Sumbar	Sumatera	Outside Java	Western	2	1	1	1	1	LA	5	9	29	30	59	49.1525
90	Sijunjung	Sijunjung	Sumbar	Sumatera	Outside Java	Western	2	0	0	1	1	LA	5	2	29	44	73	39.726
91	Kota pekanbaru	Kota Pekanbaru	Riau	Sumatera	Outside Java	Western	1	0	1	1	1	LA	3	7	22	72	94	23.4043
92	Rengat	Indragiri Hulu	Riau	Sumatera	Outside Java	Western	2	0	1	1	1	LA	5	3	21	27	48	43.75
93	Teluk kuantan	Kuantan Singingi	Riau	Sumatera	Outside Java	Western	2	0	0	1	1	LA	5	5	21	24	45	46.6667
94	Pasir pangarayan	Rokan Hulu	Riau	Sumatera	Outside Java	Western	2	0	0	1	1	LA	5	6	24	30	54	44.4444
95	Tembilahan	Indragiri Hilir	Riau	Sumatera	Outside Java	Western	2	1	1	1	1	LA	5	2	18	19	37	48.6486
96	Selat panjang	Kepulauan Meranti	Riau	Sumatera	Outside Java	Western	2	1	0	1	1	LA	5	6	5	13	18	27.7778
97	Bagansiapiapi	Rokan Hilir	Riau	Sumatera	Outside Java	Western	2	1	1	1	1	LA	5	2	20	24	44	45.4545
98	Kota Dumai	Kota Dumai	Riau	Sumatera	Outside Java	Western	2	1	1	1	1	LA	4	5	21	30	51	41.1765
99	Kota Kijang	Bintan	Kep Riau	Sumatera	Outside Java	Western	2	1	0	1	1	LA	5	6	35	27	62	56.4516
100	Batam	Kota Batam	Kep Riau	Sumatera	Outside Java	Western	2	1	1	1	1	LA	3	5	11	25	36	30.5556
101	Tanjungpinang	Kota Tanjung Pinang	Kep Riau	Sumatera	Outside Java	Western	1	1	0	1	1	LA	4	4	22	28	50	44
102	Tanjungbalai Karimun	Karimun	Kep Riau	Sumatera	Outside Java	Western	2	1	0	1	1	LA	5	5	7	26	33	21.2121
103	Kota Jambi	Kota Jambi	Jambi	Sumatera	Outside Java	Western	1	0	1	1	1	LA	4	4	26	36	62	41.9355
104	Muara bungo	Bungo	Jambi	Sumatera	Outside Java	Western	2	0	1	1	1	LA	5	4	34	38	72	47.2222
105	Sungai penuh	Kota Sungaipenuh	Jambi	Sumatera	Outside Java	Western	2	0	1	1	1	LA	5	2	22	38	60	36.6667
106	Muara tebo	Tebo	Jambi	Sumatera	Outside Java	Western	2	0	1	1	1	LA	5	4	22	31	53	41.5094
107	Sarolangun	Sarolangon	Jambi	Sumatera	Outside Java	Western	2	0	1	1	2	LB	5	4	26	48	74	35.1351
108	Bangko	Merangin	Jambi	Sumatera	Outside Java	Western	2	0	1	1	2	LB	5	4	30	30	60	50
109	Bintuhan	Kaur	Bengkulu	Sumatera	Outside Java	Western	2	1	0	1	1	LA	5	9	29	38	67	43.2836
110	Kota Bengkulu	Kota Bengkulu	Bengkulu	Sumatera	Outside Java	Western	2	1	1	1	1	LA	4	2	35	53	88	39.7727
111	Curup	Rejang Lebong	Bengkulu	Sumatera	Outside Java	Western	2	0	1	2	1	HA	5	3	27	29	56	48.2143
112	Arga Makmur	Bengkulu Utara	Bengkulu	Sumatera	Outside Java	Western	2	1	1	1	1	LA	5	2	34	39	73	46.5753
113	Muara aman	Lebong	Bengkulu	Sumatera	Outside Java	Western	2	0	1	1	1	LA	5	3	13	23	36	36.1111
114	Muko muko	Mukomuko	Bengkulu	Sumatera	Outside Java	Western	2	1	1	1	1	LA	5	4	31	47	78	39.7436
115	Manna	Bengkulu Selatan	Bengkulu	Sumatera	Outside Java	Western	2	1	1	1	1	LA	5	4	34	42	76	44.7368
116	Tais	Seluma	Bengkulu	Sumatera	Outside Java	Western	2	1	1	1	1	LA	5	9	39	38	77	50.6494
117	Lubuk linggau	Kota Lubuk Linggau	Sumsel	Sumatera	Outside Java	Western	2	0	0	1	1	LA	4	3	32	46	78	41.0256
118	Pagaralam	Kota Pagaralam	Sumsel	Sumatera	Outside Java	Western	2	0	0	1	1	LA	5	2	41	52	93	44.086
119	Kota Palembang	Kota Palembang	Sumsel	Sumatera	Outside Java	Western	1	0	0	1	1	LA	2	5	34	54	88	38.6364
120	Kota Prabumulih	Kota Prabumulih	Sumsel	Sumatera	Outside Java	Western	2	0	0	1	1	LA	5	5	37	46	83	44.5783
121	Pangkalanbalai	Banyu asin	Sumsel	Sumatera	Outside Java	Western	1	1	1	1	1	LA	5	4	36	39	75	48
122	Kota Kayuagung	Ogan Komering Ilir	Sumsel	Sumatera	Outside Java	Western	2	1	1	1	1	LA	5	9	33	46	79	41.7722
123	Sekayu	Musi Banyuasin	Sumsel	Sumatera	Outside Java	Western	1	0	1	1	1	LA	5	2	34	44	78	43.5897
124	Indralaya	Ogan Ilir	Sumsel	Sumatera	Outside Java	Western	2	0	1	1	1	LA	5	3	37	46	83	44.5783
125	Lahat	Lahat	Sumsel	Sumatera	Outside Java	Western	2	0	0	1	1	LA	5	1	42	48	90	46.6667
126	Martapura	Ogan Komering Ulu Timur	Sumsel	Sumatera	Outside Java	Western	2	0	1	1	1	LA	5	3	22	35	57	38.5965
127	Muntok	Bangka Barat	Kep Babel	Sumatera	Outside Java	Western	2	1	0	1	1	LA	5	5	29	42	71	40.8451
128	Sungailiat	Bangka	Kep Babel	Sumatera	Outside Java	Western	2	1	1	1	1	LA	5	5	44	46	90	48.8889
129	Taboali	Bangka Selatan	Kep Babel	Sumatera	Outside Java	Western	2	1	1	1	1	LA	5	4	36	32	68	52.9412
130	Koba	Bangka Tengah	Kep Babel	Sumatera	Outside Java	Western	2	1	1	1	1	LA	5	4	16	31	47	34.0426
131	Tanjungpandan	Belitung	Kep Babel	Sumatera	Outside Java	Western	2	1	1	1	1	LA	5	2	33	40	73	45.2055
132	Manggar	Belitung Timur	Kep Babel	Sumatera	Outside Java	Western	2	1	0	1	1	LA	5	5	37	39	76	48.6842
133	Kota Pangkalpinang	Kota Pangkal Pinang	Kep Babel	Sumatera	Outside Java	Western	2	0	0	1	1	LA	4	4	35	54	89	39.3258
134	Bandarlampung	Kota Bandar Lampung	Lampung	Sumatera	Outside Java	Western	2	1	1	1	2	LB	4	1	29	50	79	36.7089
135	Metro	Kota Metro	Lampung	Sumatera	Outside Java	Western	2	0	1	1	3	LC	3	1	43	45	88	48.8636
136	Krui	Pesisir Barat	Lampung	Sumatera	Outside Java	Western	2	1	1	1	3	LC	5	6	31	36	67	46.2687
137	Kotabumi	Lampung Utara	Lampung	Sumatera	Outside Java	Western	2	0	0	1	1	LA	5	2	34	52	86	39.5349
138	Menggala	Tulangbawang	Lampung	Sumatera	Outside Java	Western	2	1	1	1	3	LC	5	3	27	38	65	41.5385
139	Sukadana	Lampung Timur	Lampung	Sumatera	Outside Java	Western	2	1	1	1	1	LA	5	4	42	53	95	44.2105
140	Kalianda	Lampung Selatan	Lampung	Sumatera	Outside Java	Western	2	1	0	1	2	LB	5	2	33	66	99	33.3333
141	Singkawang	Kota Singkawang	Kalbar	Kalimantan	Outside Java	Western	1	1	0	1	1	LA	4	2	21	32	53	39.6226
142	Bengkayang	Bengkayang	Kalbar	Kalimantan	Outside Java	Western	2	1	0	1	1	LA	5	4	25	30	55	45.4545
143	Pontianak	Kota Pontianak	Kalbar	Kalimantan	Outside Java	Western	1	1	1	1	1	LA	3	2	31	41	72	43.0556
144	Sanggau	Sanggau	Kalbar	Kalimantan	Outside Java	Western	2	0	1	1	1	LA	5	4	30	26	56	53.5714
145	Ketapang	Ketapang	Kalbar	Kalimantan	Outside Java	Western	2	0	1	1	1	LA	5	8	28	31	59	47.4576
146	Kota Palangkaraya	Kota Palangkaraya	Kalteng	Kalimantan	Outside Java	Western	2	0	0	1	1	LA	4	2	15	24	39	38.4615
147	Sampit	Kotawaringin Timur	Kalteng	Kalimantan	Outside Java	Western	2	0	1	1	1	LA	5	2	19	39	58	32.7586
148	Pangkalanbun	Kotawaringin Barat	Kalteng	Kalimantan	Outside Java	Western	2	0	0	1	1	LA	5	2	20	34	54	37.037
149	Kuala Kapuas	Kapuas	Kalteng	Kalimantan	Outside Java	Western	2	0	1	1	1	LA	5	2	20	33	53	37.7358
150	Puruk cahu	Murung Raya	Kalteng	Kalimantan	Outside Java	Western	2	0	0	1	1	LA	5	5	6	23	29	20.6897
151	Banjarmasin	Kota Banjarmasin	Kalsel	Kalimantan	Outside Java	Western	1	1	1	1	1	LA	3	2	20	35	55	36.3636
152	Banjarbaru	Kota Banjarbaru	Kalsel	Kalimantan	Outside Java	Western	1	0	0	1	1	LA	4	2	11	12	23	47.8261
153	Pelaihari	Tanah Laut	Kalsel	Kalimantan	Outside Java	Western	2	1	0	1	1	LA	5	5	23	21	44	52.2727
154	Martapura	Banjar	Kalsel	Kalimantan	Outside Java	Western	2	0	1	1	2	LB	5	5	22	20	42	52.381
155	Sendawar	Kutai Barat	Kaltim	Kalimantan	Outside Java	Western	2	0	0	1	3	LC	5	4	23	116	139	16.5468
156	Sangatta	Kutai Timur	Kaltim	Kalimantan	Outside Java	Western	1	1	1	1	1	LA	5	6	11	50	61	18.0328
157	Paser	Paser	Kaltim	Kalimantan	Outside Java	Western	2	0	1	1	3	LC	5	5	9	37	46	19.5652
158	Samarinda	Kota Samarinda	Kaltim	Kalimantan	Outside Java	Western	1	1	1	1	1	LA	3	2	14	31	45	31.1111
159	Tenggarong	Kutai Kertanegara	Kaltim	Kalimantan	Outside Java	Western	1	1	1	1	1	LA	5	3	28	28	56	50
160	Bontang	Kota Bontang	Kaltim	Kalimantan	Outside Java	Western	1	1	1	1	1	LA	4	2	11	33	44	25
161	Tanjungredep	Berau	Kaltim	Kalimantan	Outside Java	Western	2	1	0	1	1	LA	5	2	25	35	60	41.6667
162	Balikpapan	Kota Balikpapan	Kaltim	Kalimantan	Outside Java	Western	1	1	0	1	1	LA	3	5	18	35	53	33.9623
163	Malinau	Malinau	Kaltara	Kalimantan	Outside Java	Western	2	0	1	1	1	LA	5	5	8	15	23	34.7826
164	Kota Tarakan	Kota Tarakan	Kaltara	Kalimantan	Outside Java	Western	2	1	0	1	1	LA	4	2	14	37	51	27.451
165	Nunukan	Nunukan	Kaltara	Kalimantan	Outside Java	Western	2	1	1	1	1	LA	5	9	3	14	17	17.6471
166	Tanjungselor	Bulungan	Kaltara	Kalimantan	Outside Java	Western	2	1	1	1	1	LA	5	7	19	35	54	35.1852
167	Makassar	Kota Makassar	Sulsel	Sulawesi	Outside Java	Eastern	1	1	0	1	2	LB	2	4	27	42	69	39.1304
168	Parepare	Kota Parepare	Sulsel	Sulawesi	Outside Java	Eastern	2	1	0	1	1	LA	4	5	14	39	53	26.4151
169	Barru	Barru	Sulsel	Sulawesi	Outside Java	Eastern	2	1	1	1	1	LA	5	7	32	17	49	65.3061
170	Maros	Maros	Sulsel	Sulawesi	Outside Java	Eastern	2	0	0	1	1	LA	5	6	23	32	55	41.8182
171	Kendari	Kota Kendari	Sultra	Sulawesi	Outside Java	Eastern	2	1	0	1	1	LA	4	2	23	53	76	30.2632
172	Bau-Bau	Kota Baubau	Sultra	Sulawesi	Outside Java	Eastern	2	0	0	1	2	LB	4	2	18	20	38	47.3684
173	Muna	Muna	Sultra	Sulawesi	Outside Java	Eastern	2	0	0	1	1	LA	5	4	10	15	25	40
174	Andolo	Konawe Selatan	Sultra	Sulawesi	Outside Java	Eastern	2	0	1	1	1	LA	5	9	15	21	36	41.6667
175	Majene	Majene	Sulbar	Sulawesi	Outside Java	Eastern	2	1	1	1	2	LB	5	4	16	21	37	43.2432
176	Mamasa	Mamasa	Sulbar	Sulawesi	Outside Java	Eastern	2	0	0	2	1	HA	5	2	5	8	13	38.4615
177	Mamuju	Mamuju	Sulbar	Sulawesi	Outside Java	Eastern	2	1	1	1	1	LA	5	3	14	17	31	45.1613
178	Donggala	Donggala	Sulteng	Sulawesi	Outside Java	Eastern	2	1	0	1	7	LG	5	2	19	9	28	67.8571
179	Poso	Poso	Sulteng	Sulawesi	Outside Java	Eastern	2	1	0	1	3	LC	5	6	13	10	23	56.5217
180	Palu	Kota Palu	Sulteng	Sulawesi	Outside Java	Eastern	2	1	0	1	7	LG	4	2	8	13	21	38.0952
181	Kota Menado	Kota Menado	Sulut	Sulawesi	Outside Java	Eastern	1	1	0	1	1	LA	3	2	7	25	32	21.875
182	Tondano	Minahasa	Sulut	Sulawesi	Outside Java	Eastern	2	0	0	2	1	HA	5	4	14	11	25	56
183	Lolak	Bolang Mongondou	Sulut	Sulawesi	Outside Java	Eastern	2	1	0	1	1	LA	5	4	15	10	25	60
184	Gorontalo	Kota Gorontalo	Gorontalo	Sulawesi	Outside Java	Eastern	2	0	0	1	1	LA	4	7	12	17	29	41.3793
185	Marisa	Pohuwatu	Gorontalo	Sulawesi	Outside Java	Eastern	2	1	0	1	1	LA	5	3	5	13	18	27.7778
186	Kwandang	Gorontalo Utara	Gorontalo	Sulawesi	Outside Java	Eastern	2	0	0	1	1	LA	5	2	15	29	44	34.0909
187	Ambon	Kota Ambon	Maluku	Maluku	Outside Java	Eastern	1	1	1	1	2	LB	4	2	31	81	112	27.6786
188	Tual	Kota Tual	Maluku	Maluku	Outside Java	Eastern	2	1	0	1	2	LB	5	4	8	30	38	21.0526
189	Masohi	Maluku Tengah	Maluku	Maluku	Outside Java	Eastern	2	1	1	1	1	LA	5	4	14	14	28	50
190	Piru	Seram Bagian Barat	Maluku	Maluku	Outside Java	Eastern	2	1	0	1	1	LA	5	4	14	39	53	26.4151
191	Ternate	Kota Ternate	Maluku Utara	Maluku	Outside Java	Eastern	2	1	0	1	1	LA	4	6	19	23	42	45.2381
192	Tobelo	Halmahera Utara	Maluku Utara	Maluku	Outside Java	Eastern	2	1	0	1	1	LA	5	4	13	33	46	28.2609
193	Sofifi	Kota Tidore Kepulauan	Maluku Utara	Maluku	Outside Java	Eastern	2	1	0	1	1	LA	5	6	3	8	11	27.2727
194	Jailolo	Halmahera Barat	Maluku Utara	Maluku	Outside Java	Eastern	2	1	0	1	4	LD	5	3	10	22	32	31.25
195	Timika	Mimika	Papua	Papua	Outside Java	Eastern	1	0	0	1	1	LA	4	7	15	14	29	51.7241
196	Merauke	Merauke	Papua	Papua	Outside Java	Eastern	2	1	0	1	5	LE	5	6	11	20	31	35.4839
197	Sentani	Jayapura	Papua	Papua	Outside Java	Eastern	2	0	1	1	1	LA	4	4	21	28	49	42.8571
198	Kota Jayapura	Kota Jayapura	Papua	Papua	Outside Java	Eastern	1	1	1	1	1	LA	5	1	6	24	30	20
199	Wamena	Jayawijaya	Papua	Papua	Outside Java	Eastern	2	0	0	2	1	HA	5	6	12	23	35	34.2857
200	Biak	Biak Numfor	Papua	Papua	Outside Java	Eastern	2	1	0	1	1	LA	5	2	15	10	25	60
201	Karubaga	Tolikara	Papua	Papua	Outside Java	Eastern	2	0	0	2	2	HB	5	4	9	10	19	47.3684
202	Sarmi	Sarmi	Papua	Papua	Outside Java	Eastern	2	1	0	1	1	LA	5	3	13	27	40	32.5
203	Manokwari	Manokwari	Papua Barat	Papua	Outside Java	Eastern	2	1	1	1	1	LA	5	7	19	57	76	25
204	Sorong	Kota Sorong	Papua Barat	Papua	Outside Java	Eastern	2	1	0	1	1	LA	4	8	17	27	44	38.6364
205	Fak-fak	Fakfak	Papua Barat	Papua	Outside Java	Eastern	2	1	0	1	1	LA	5	6	15	31	46	32.6087
206	Kaimana	Kaimana	Papua Barat	Papua	Outside Java	Eastern	2	1	0	1	1	LA	5	2	10	25	35	28.5714
207	Bintuni	Teluk Bintuni	Papua Barat	Papua	Outside Java	Eastern	2	1	1	1	1	LA	5	2	17	24	41	41.4634
208	Denpasar	Kota Denpasar	Bali	Bali	Outside Java	Eastern	1	1	0	1	3	LC	2	2	9	9	18	50
209	Tabanan	Tabanan	Bali	Bali	Outside Java	Eastern	2	1	0	1	3	LC	5	2	35	43	78	44.8718
210	Gianyar	Gianyar	Bali	Bali	Outside Java	Eastern	2	0	0	1	3	LC	5	2	9	29	38	23.6842
211	Singaraja	Buleleng	Bali	Bali	Outside Java	Eastern	2	1	1	1	3	LC	5	2	18	25	43	41.8605
212	Negara	Jembrana	Bali	Bali	Outside Java	Eastern	2	1	0	1	1	LA	5	2	16	39	55	29.0909
213	Mataram	Kota Mataram	NTB	West Nusa Tenggara	Outside Java	Eastern	1	1	0	1	2	LB	4	7	10	30	40	25
214	Praya	Lombok Tengah	NTB	West Nusa Tenggara	Outside Java	Eastern	2	1	0	1	4	LD	5	7	18	16	34	52.9412
215	Sumbawa Besar	Sumbawa	NTB	West Nusa Tenggara	Outside Java	Eastern	1	1	0	1	4	LD	5	5	11	16	27	40.7407
216	Bima	Kota Bima	NTB	West Nusa Tenggara	Outside Java	Eastern	2	1	1	1	6	LF	4	2	9	19	28	32.1429
217	Dompu	Dompu	NTB	West Nusa Tenggara	Outside Java	Eastern	2	1	1	1	6	LF	5	2	14	30	44	31.8182
218	Kupang	Kota Kupang	NTT	East Nusa Tenggara	Outside Java	Eastern	1	1	1	1	5	LE	4	4	13	10	23	56.5217
219	Alor	Alor	NTT	East Nusa Tenggara	Outside Java	Eastern	2	1	0	1	6	LF	5	6	12	16	28	42.8571
220	Sikka	Sikka	NTT	East Nusa Tenggara	Outside Java	Eastern	2	1	0	1	5	LE	5	2	15
221	Belu	Belu	NTT	East Nusa Tenggara	Outside Java	Eastern	2	1	1	1	4	LD	5	2	10	13	23	43.4783
222	Waykabubak	Sumba Barat	NTT	East Nusa Tenggara	Outside Java	Eastern	2	1	0	1	5	LE	5	3	30	20	50	60
223	Tambolaka	Sumba Barat Daya	NTT	East Nusa Tenggara	Outside Java	Eastern	2	1	0	1	1	LA	5	2	29	42	71	40.8451
224	Manggarai	Manggarai	NTT	East Nusa Tenggara	Outside Java	Eastern	2	1	0	2	1	HA	5	7	16	68	84	19.0476
