# Supplementary material
Source: MDPI journal article supplement (https://www.mdpi.com/2071-1050/13/14/7835)
Supplement: s1 [file s1 › Table S4 Revision track changes-edited.pdf]

**Table S4.** Distribution of FTS by geographic category and quadrant group member.

| No. | Species/Family/Status <sup>z</sup> /Origin <sup>y</sup>       | Common/Local name                          | Distribution freq. |       |        | Score (%) <sup>x</sup> | Group |
|-----|---------------------------------------------------------------|--------------------------------------------|--------------------|-------|--------|------------------------|-------|
|     |                                                               |                                            | City               | Prov. | Region |                        |       |
| A.  | Very common species                                           |                                            |                    |       |        |                        |       |
| 1   | <i>Annona muricata</i> L./Annonaceae/C/                       | Soursop/Sirsak                             | 119                | 29    | 9      | 79.47                  | 1     |
| 2   | <i>Annona reticulata</i> L. /Annonaceae/A/                    | Sweetsop/Srikaya                           | 93                 | 29    | 9      | 75.60                  | 1     |
| 3   | <i>Arthocarpus altilis</i> (Park.) Fosberg/Moraceae/A/        | Breadfruit/Sukun                           | 134                | 32    | 9      | 84.65                  | 1     |
| 4   | <i>Arthocarpus heterophyllus</i> Lam./Moraceae/C/             | Jackfruit/Nangka                           | 176                | 34    | 9      | 92.86                  | 1     |
| 5   | <i>Averrhoa bilimbi</i> L./Oxalidaceae/A/                     | Bilimbi/ Belimbing wuluh                   | 130                | 30    | 9      | 82.09                  | 1     |
| 6   | <i>Carica papaya</i> L./Caricaceae/C/I                        | Papaya/Pepaya                              | 138                | 33    | 9      | 86.22                  | 1     |
| 7   | <i>Cocos nucifera</i> /Arecaceae/C/N                          | Coconut/Kelapa                             | 192                | 34    | 9      | 95.24                  | 1     |
| 8   | <i>Dimorcarpus longan</i> (Lour.) Steud/Sapindaceae/C/        | Longan/Lengkeng                            | 141                | 31    | 9      | 84.71                  | 1     |
| 9   | <i>Laucaena leucocephala</i> (Lam.) de Wit/Fabaceae/INV/I     | Lauchaena/Petai cina                       | 126                | 32    | 9      | 83.46                  | 1     |
| 10  | <i>Mangifera indica</i> L./Annacardiaceae/C/N                 | Mango/Mangga                               | 205                | 34    | 9      | 97.17                  | 1     |
| 11  | <i>Mimusops elengi</i> Linn. /Sapotaceae/A/I                  | Spanish cerry/Tanjung                      | 146                | 31    | 8      | 81.75                  | 1     |
| 12  | <i>Morinda citrifolia</i> L./Rubiaceae/C/                     | Morinda/Pace                               | 117                | 30    | 9      | 80.16                  | 1     |
| 13  | <i>Muntingia calabura</i> L./Muntingiaceae/INV/I              | Calabur tree/Kersen                        | 174                | 34    | 9      | 92.56                  | 1     |
| 14  | <i>Musa paradisiaca</i> L/ Musaceae/C/N                       | Banana/Pisang                              | 132                | 30    | 8      | 78.68                  | 1     |
| 15  | <i>Nephelium lappaceum</i> L./Sapindaceae/A/                  | Rambutan                                   | 140                | 29    | 8      | 78.89                  | 1     |
| 16  | <i>Psidium guajava</i> Linn. /Myrtaceae/C/I                   | Guava/Jambu biji                           | 156                | 32    | 9      | 87.92                  | 1     |
| 17  | <i>Syzygium aqueum</i> Burm F/Myrtaceae/C/N                   | Rose apple/Jambu air                       | 174                | 32    | 9      | 90.60                  | 1     |
| 18  | <i>Syzygium mallaccense</i> (L.) Merr. & Perry/ Myrtaceae/C/N | Rose apple/Jambu dersono                   | 110                | 30    | 9      | 79.11                  | 1     |
| B.  | Common Distribution                                           |                                            |                    |       |        |                        |       |
| 1   | <i>Aleurites moluccanus</i> (L.) Willd./Euphorbiaceae/C/N     | Candle nuts/kemiri                         | 46                 | 22    | 7      | 54.34                  | 1     |
| 2   | <i>Arthocarpus integer</i> Spreng. Moraceae/E/N               | Campeden/Cempedak                          | 40                 | 21    | 7      | 52.47                  | 4     |
| 3   | <i>Averrhoa carambola</i> L. /Oxalidaceae/C/                  | Starfruit/Belimbing                        | 115                | 26    | 7      | 68.53                  | 6     |
| 4   | <i>Citrus aurantifolia</i> (Christm.) Swingle/Rutaceae/A/I    | -/Jeruk nipis                              | 69                 | 24    | 6      | 56.02                  | 6     |
| 5   | <i>Citrus limon</i> (L.) Burm.f./Rutaceae/C/I                 | Lemon/Jeruk lemon, jeruk sitrun            | 68                 | 20    | 7      | 55.65                  | 6     |
| 6   | <i>Crysophyllum cainito</i> L./Sapotaceae/R/                  | Star apple/sawo duren, sawo manila, kenitu | 52                 | 19    | 8      | 56.00                  | 1     |
| 7   | <i>Durio zybethinus</i> L./Malvaceae/C/N                      | Durian                                     | 101                | 27    | 8      | 71.13                  | 4     |
| 8   | <i>Gnetum gnemon</i> Linn./Gnetaceae/C/N                      | Gnetum seed/Melinjo                        | 78                 | 22    | 7      | 59.10                  | 1     |

| No.                           | Species/Family/Status <sup>z</sup> /Origin <sup>y</sup>             | Common/Local name                                                 | Distribution freq. |       |        | Score (%) <sup>x</sup> | Group |
|-------------------------------|---------------------------------------------------------------------|-------------------------------------------------------------------|--------------------|-------|--------|------------------------|-------|
|                               |                                                                     |                                                                   | City               | Prov. | Region |                        |       |
| 9                             | <i>Lansium domesticum</i> Corr./<br>Meliaceae/C/N                   | Dokoo/Duku                                                        | 62                 | 23    | 8      | 61.40                  | 4     |
| 10                            | <i>Mangifera foetida</i> Lour<br>/Anacardiaceae/R/N                 | Horse mango/limus,<br>bacang, embacang                            | 49                 | 19    | 7      | 51.85                  | 1     |
| 11                            | <i>Manilkara kauki</i> (L.) Duby<br>(Sapot)/Sapotaceae/R/N          | Sawo kecil                                                        | 66                 | 19    | 8      | 58.08                  | 1     |
| 12                            | <i>Manilkara zopota</i> L. / Sapotaceae/<br>R/N                     | Zapota/Sawo                                                       | 106                | 24    | 8      | 68.93                  | 1     |
| 13                            | <i>Persea americana</i> Mill/ Lauraceae/C/I                         | Avocado/Alpokot                                                   | 107                | 26    | 8      | 71.04                  | 1     |
| 14                            | <i>Phoenix dactylifera</i> / Arecaceae/C/I                          | Date palm/Kurma                                                   | 76                 | 25    | 6      | 58.04                  | 1     |
| 15                            | <i>Pithecelobium dulce</i> (Roxb.)<br>Benth/Fabaceae/E/N            | Manila tamarind/Asem<br>keranji                                   | 76                 | 24    | 8      | 64.47                  | 1     |
| 16                            | <i>Pometia pinnata</i> J. R & G. Forst/<br>Sapindaceae/R/N          | Matoa                                                             | 96                 | 26    | 7      | 65.70                  | 1     |
| 17                            | <i>Punica granatum</i> L./Lythraceae/C/I                            | Pomegranate/Delima                                                | 55                 | 24    | 7      | 57.64                  | 1     |
| 18                            | <i>Tamarindus indica</i> L/Fabaceae/E/N                             | Tamarind/Asam jawa                                                | 94                 | 27    | 9      | 73.79                  | 4     |
| <b>C. Less common species</b> |                                                                     |                                                                   |                    |       |        |                        |       |
| 1                             | <i>Anacardium occidentale</i> L./<br>Anacardiaceae/C/I              | Cashew nut/jambu<br>monyet                                        | 44                 | 20    | 6      | 48.38                  | 4     |
| 2                             | <i>Ananas comosus</i> (L.) Merr./<br>Bromeliaceae/C/I               | Pineapple/Nanas                                                   | 7                  | 7     | 6      | 30.13                  | 4     |
| 3                             | <i>Antidesma bunius</i> (L.) Spreng./<br>Phyllanthaceae/E/          | Queensland-cherry/buni                                            | 29                 | 11    | 5      | 33.62                  | 4     |
| 4                             | <i>Archidendron jiringa</i> (Jack) I. C.<br>Nielsen)/Fabaceae/R/N   | Jiringa/Jengkol                                                   | 39                 | 15    | 5      | 39.03                  | 6     |
| 5                             | <i>Arenga pinnata</i> (Wurmb.)<br>Merr./Arecaceae/E/N               | Sugar palm/Aren                                                   | 47                 | 17    | 5      | 42.18                  | 1     |
| 6                             | <i>Arthocarpus elasticus</i> Reinw.<br>Moraceae/E/N                 | Benda, tarok, teureup,<br>tarap                                   | 25                 | 14    | 5      | 35.96                  | 4     |
| 7                             | <i>Borassus flabellifer</i> L./Arecaceae/E/N                        | Lontar, siwalan, lontara,<br>tala                                 | 16                 | 8     | 5      | 28.74                  | 4     |
| 8                             | <i>Bouea macrophylla</i> Griffith/<br>Anacardiaceae/E/N             | Marian plum/Gandaria,<br>ramania, jatake                          | 22                 | 16    | 6      | 41.18                  | 4     |
| 9                             | <i>Bruguiera gymnorhiza</i> Lamk/<br>Rhizophoraceae/R/N             | Tancang, tanjang merah,<br>aibon, parepat darat,<br>parai, lindur | 13                 | 9     | 5      | 29.28                  | 4     |
| 10                            | <i>Calophyllum soulattri</i> Burm. f./<br>Calophyllaceae/E/N        | Bintangor, ntorang,<br>nyanyamplungan                             | 7                  | 7     | 6      | 30.13                  | 6     |
| 11                            | <i>Canarium commune</i> L./<br>Burseraceae/R/N                      | Java almond/Kenari                                                | 33                 | 14    | 8      | 48.27                  | 6     |
| 12                            | <i>Citrus grandis</i> Osbeck/Rutaceae/C/I                           | Pamelo/Jeruk Besar                                                | 23                 | 12    | 5      | 33.71                  | 1     |
| 13                            | <i>Citrus sinensis</i> L. Osbeck/<br>Rutaceae/C/I                   | Sweet orange/Jeruk<br>manis                                       | 16                 | 10    | 4      | 27.00                  | 2     |
| 14                            | <i>Coffea arabica</i> L./Rubiaceae/C/I                              | Coffee/Kopi                                                       | 19                 | 12    | 7      | 40.52                  | 1     |
| 15                            | <i>Diospyros blancoi</i> A.DC./<br>Ebenaceae/R/I                    | Velvet apple,<br>mabolo/Bisbul, sembolo                           | 30                 | 13    | 5      | 35.73                  | 1     |
| 16                            | <i>Ficus racemosa</i> L/ Moraceae/E/N                               | Indian fig tree/Loa, elo                                          | 19                 | 10    | 5      | 31.15                  |       |
| 17                            | <i>Garcinia mangostana</i> L./<br>Clusiaceae/C/N                    | Mangosteen/Manggis                                                | 43                 | 19    | 6      | 47.25                  | 4     |
| 18                            | <i>Hylocereus undatus</i> (Haworth)<br>Britton & Rose/Cactaceae/C/I | Dragon fruit/Buah naga                                            | 24                 | 13    | 5      | 34.84                  | 2     |

| No. | Species/Family/Status <sup>z</sup> /Origin <sup>y</sup>                   | Common/Local name                                        | Distribution freq. |       |        | Score (%) <sup>x</sup> | Group |
|-----|---------------------------------------------------------------------------|----------------------------------------------------------|--------------------|-------|--------|------------------------|-------|
|     |                                                                           |                                                          | City               | Prov. | Region |                        |       |
| 19  | <i>Lannea coromandelica</i> (Houtt.) Merr./<br>Anacardiaceae/E/N          | Indian ash tree/kudo reo,<br>ki kuda, kedondong laki     | 25                 | 8     | 5      | 30.08                  | 4     |
| 20  | <i>Lansium parasiticum</i> (Osbeck) K.C.<br>Sahni & Bennet/ Meliaceae/E/N | Langsat, langsep,<br>kokosan                             | 16                 | 12    | 6      | 36.37                  | 4     |
| 21  | <i>Litchi chinensis</i> Sonn./<br>Sapindaceae/R/I                         | Lychee/Leci                                              | 13                 | 10    | 6      | 33.96                  | 4     |
| 22  | <i>Mangifera casturi</i> Kosterm/<br>Anacardiaceae/E/N                    | Casturi mango/Mangga<br>kasturi                          | 26                 | 15    | 4      | 33.39                  | 4     |
| 23  | <i>Mangifera x odorata</i> Griffith/<br>Anacardiaceae/E/N                 | Kwini, kweni, kuwini                                     | 38                 | 22    | 4      | 42.04                  | 1     |
| 24  | <i>Morus indica</i> L./Moraceae/R/I                                       | Mulberry/Murbei, arbei                                   | 22                 | 12    | 5      | 33.56                  | 1     |
| 25  | <i>Myristica fragrans</i> Houtt/<br>Myristicaceae/C/N                     | Nutmeg/ Pala, pala<br>banda                              | 18                 | 12    | 6      | 36.67                  | 1     |
| 26  | <i>Parkia javanica</i> Lam/ Fabaceae/E/N                                  | Kedaung, kedhawung                                       | 50                 | 19    | 6      | 48.29                  | 5     |
| 27  | <i>Salacca zalacca</i> /Arecaceae/C/N                                     | Snake fruit/Salak                                        | 26                 | 15    | 6      | 40.80                  | 1     |
| 28  | <i>Sandorium koetjape</i> (Burm.f.) Merr./<br>Meliaceae/E/N               | Santol/Kecapi, sentul                                    | 10                 | 9     | 6      | 32.53                  | 4     |
| 29  | <i>Spondias dulcis</i> L./Anacardiaceae<br>/R/N                           | Ambarela/Kedondong<br>liar, kedondong kecil              | 17                 | 11    | 6      | 35.54                  | 4     |
| 30  | <i>Spondias pinnata</i> (L.f.) Kurz/<br>Anacardiaceae /A/I                | Hog plum/ kendondong                                     | 55                 | 15    | 4      | 37.71                  | 1     |
| 31  | <i>Syzygium cumini</i> (L.) Skeels/<br>Myrtaceae/E/N                      | Java plum/jamblang,<br>duwet                             | 35                 | 19    | 6      | 46.06                  | 1     |
| 32  | <i>Theobroma cacao</i> L./ Malvaceae/C/I                                  | Cocoa/Kakao                                              | 70                 | 18    | 6      | 50.29                  | 1     |
| D.  | <b>Species rarely found in the city</b>                                   |                                                          |                    |       |        |                        |       |
| 1   | <i>Aegle marmelos</i> (L.) Corr./<br>Rutaceae/E/N                         | Bael/Maja legi                                           | 10                 | 8     | 3      | 20.44                  | 4     |
| 2   | <i>Annona glabra</i> L./Annonaceae/R/I                                    | Pond apple, alligator<br>apple/Serba rasa                | 18                 | 9     | 2      | 18.91                  | 4     |
| 3   | <i>Antidesma ghaesembilla</i> Gaern/<br>Phyllanthaceae/E/N                | Black currant tree/Pune,<br>mayam                        | 3                  | 3     | 3      | 14.50                  | 5     |
| 4   | <i>Ardisia elliptica</i> Thunb./<br>Primulaceae/E/I                       | Shoebutton, ink berry/<br>wuni, buni keraton,<br>lempeni | 3                  | 3     | 3      | 14.50                  | 5     |
| 5   | <i>Arthocarpus camansi</i> Blanco/<br>Moraceae/E/N                        | Breadnut/Keluwih,<br>kluwih                              | 6                  | 6     | 2      | 14.18                  | 4     |
| 6   | <i>Arthocarpus rigidus</i> Blume/<br>Moraceae/E/N                         | Monkey jackfruit/Pussar,<br>tempunik, mandalika          | 3                  | 3     | 2      | 10.80                  | 4     |
| 7   | <i>Baccaurea racemosa</i> (Reinw.) Muell.<br>Arg/ Phyllanthaceae/E/N      | Menteng, bencoy<br>kepundung                             | 7                  | 6     | 4      | 21.74                  | 6     |
| 8   | <i>Baccaurea macrocarpa</i> /<br>Phyllanthaceae/E/N                       | Tampoi, tampui, cupak,<br>rambai                         | 4                  | 4     | 3      | 15.63                  | 5     |
| 9   | <i>Bellucia pentamera</i> Naudin/<br>Melastomataceae/E/N                  | Manzana de montana/<br>Jambu tangkalak, jambu<br>akasia  | 3                  | 3     | 2      | 10.80                  | 5     |
| 10  | <i>Borassus aethiopum</i> Mart./<br>Arecaceae/E/I                         | Afrikan fan palm, ron<br>palm/Palem palmira              | 3                  | 3     | 1      | 7.09                   | 5     |
| 11  | <i>Borassus heineanus</i> Becc./<br>Arecaceae/E/N                         | Palem lontar irian, kelapa<br>hutan, waribo              | 9                  | 8     | 4      | 24.00                  | 4     |
| 12  | <i>Breynia cernua</i> (Poir.) Mull. Arg./<br>Phyllanthaceae/E/I           | Breynia, coffee bush/<br>Tandangolu                      | 1                  | 1     | 1      | 4.83                   | 5     |

| No. | Species/Family/Status <sup>z</sup> /Origin <sup>y</sup>                 | Common/Local name                                        | Distribution freq. |       |        | Score (%) <sup>x</sup> | Group |
|-----|-------------------------------------------------------------------------|----------------------------------------------------------|--------------------|-------|--------|------------------------|-------|
|     |                                                                         |                                                          | City               | Prov. | Region |                        |       |
| 13  | <i>Burckella obovata</i> (G. Forst.) Pierre/<br>Sapotaceae/E/N          | Nyatoh, buah kaum,<br>takun                              | 3                  | 3     | 2      | 10.80                  | 5     |
| 14  | <i>Canarium decumanum</i> Gaertn./<br>Burseraceae/E/N                   | Pig canary/kenari babi,<br>kenari Singkawang             | 4                  | 3     | 3      | 14.65                  | 4     |
| 15  | <i>Castanopsis acuminatissima</i> (Blume)<br>A. DC/ Fagaceae/E/N        | Papua oak/Ki riung<br>anakheye                           | 2                  | 2     | 1      | 5.96                   | 6     |
| 16  | <i>Coffea excelca</i> L./Rubiaceae/R/I                                  | Liberica coffee/Kopi<br>ekselsa                          | 2                  | 2     | 1      | 5.96                   | 5     |
| 17  | <i>Cynometra cauliflora</i> L./<br>Fabaceae/R/N                         | Nam-nam/Nam-nam,<br>namu-namu, pukih                     | 8                  | 8     | 4      | 23.85                  | 4     |
| 18  | <i>Diospyros kaki</i> L.f/Ebenaceae/C/I                                 | Persimmon/Kesemek,<br>semek                              | 3                  | 3     | 2      | 10.80                  | 6     |
| 19  | <i>Dracontomelon dao</i> (Blanco) Merr. &<br>Rolfe/Anacardiaceae/E/N    | Pacific walnut/Rao, dahu,<br>sengkuang                   | 6                  | 4     | 3      | 15.93                  | 4     |
| 20  | <i>Durio acutifolius</i> (Mast.) Kosterm/<br>Malvaceae/E/N              | Durian daun runcing,<br>durian burung                    | 1                  | 1     | 1      | 4.83                   | 5     |
| 21  | <i>Durio dulcis</i> Becc/Malvaceae/E/N                                  | Lai                                                      | 2                  | 2     | 2      | 9.67                   | 5     |
| 22  | <i>Durio kutejensis</i> (Hassk.) Becc./<br>Malvaceae/E/N                | Lahung, durian merah                                     | 2                  | 2     | 2      | 9.67                   | 5     |
| 23  | <i>Durio oxleyanus</i> Griffith/Malvaceae<br>/E/N                       | Durian mahrawin,<br>karantungan, sukan                   | 2                  | 2     | 1      | 5.96                   | 5     |
| 24  | <i>Elaeocarpus floribundus</i> Bl./<br>Elaeocarpaceae/E/N               | Tuntun angina, damu                                      | 1                  | 1     | 1      | 4.83                   | 2     |
| 25  | <i>Elaeocarpus sphaericus</i> (Gaertn.) K.<br>Schum)/Elaeocarpaceae/E/N | Rudraksha/Ninto                                          | 2                  | 2     | 2      | 9.67                   | 6     |
| 26  | <i>Elattostachys verrucosa</i> (Blume)<br>Radlk./Sapindaceae/E/N        | Lowe api                                                 | 1                  | 1     | 1      | 4.83                   | 2     |
| 27  | <i>Enterolobium cyclocarpum</i> (Jacq.)<br>Griseb./Fabaceae/E/I         | Guanacaste, elephant-ear<br>tree/Sengon buto             | 1                  | 1     | 1      | 4.83                   | 5     |
| 28  | <i>Eriobotrya japonica</i> (Thunb.) Lindl./<br>Rosaceae/C/I             | Loquat/Biwa, lokat,<br>loukat, lokwat, papalaan          | 4                  | 3     | 2      | 10.94                  | 1     |
| 29  | <i>Eugenia uniflora</i> Lam/Myrtaceae/E/I                               | Pitanga/Dewandaru                                        | 12                 | 6     | 2      | 15.08                  | 1     |
| 30  | <i>Ficus carica</i> L./Moraceae/C/I                                     | Fig tree/Buah tin                                        | 1                  | 1     | 1      | 4.83                   | 3     |
| 31  | <i>Ficus fistulosa</i> Reinw/ Moraceae/E/N                              | Benying, labe, beunying,<br>ai yumbul                    | 3                  | 3     | 3      | 14.50                  | 6     |
| 32  | <i>Ficus fulva</i> Reinw. ex Bl./<br>Moraceae/E/N                       | Hamerang, lento,<br>hamerang minyak                      | 1                  | 1     | 1      | 4.83                   | 2     |
| 33  | <i>Ficus punctata</i> Thunb./Moraceae<br>/E/N                           | Climbing fig/Menca, ki<br>batara                         | 1                  | 1     | 1      | 4.83                   | 2     |
| 34  | <i>Ficus variegata</i> Blume/Moraceae<br>/E/N                           | Red stem fig/ara,<br>gondang, nyawai                     | 7                  | 5     | 3      | 17.05                  | 1     |
| 35  | <i>Flacourtia inermis</i> Roxb./<br>Salicaceae/E/N                      | Batoko plum/Lobi-lobi                                    | 9                  | 7     | 4      | 23.02                  | 5     |
| 36  | <i>Flacourtia rukam</i> Zoll. & Moritzi/<br>Salicaceae/E/N              | Rukam, rakem, rukem                                      | 8                  | 7     | 2      | 15.46                  | 5     |
| 37  | <i>Garcinia celebica</i> L./Clusiaceae/E/N                              | Seashore mangosteen/<br>Baros, kalawet, manggis<br>hutan | 3                  | 3     | 1      | 7.09                   | 5     |
| 38  | <i>Garcinia dulcis</i> (Roxb.) Kurz/<br>Clusiaceae/E/N                  | Yellow mangosteen/<br>Mundu, badung                      | 7                  | 5     | 2      | 13.35                  | 6     |
| 39  | <i>Garcinia xanthochymus</i> Hook. f. ex T.<br>Anders/ Clusiaceae/E/N   | Egg tree/Asam kandis,<br>asam gelugur                    | 4                  | 4     | 2      | 11.92                  | 5     |

| No. | Species/Family/Status <sup>z</sup> /Origin <sup>y</sup>           | Common/Local name                               | Distribution freq. |       |        | Score (%) <sup>x</sup> | Group |
|-----|-------------------------------------------------------------------|-------------------------------------------------|--------------------|-------|--------|------------------------|-------|
|     |                                                                   |                                                 | City               | Prov. | Region |                        |       |
| 40  | <i>Inga feuillei</i> DC/ Fabaceae/E/I                             | Pacay/Buah es                                   | 1                  | 1     | 1      | 4.83                   | 5     |
| 41  | <i>Inocarpus edulis</i> Forst/Fabaceae /E/N                       | Tahitian chestnut/<br>Gayam, gayang             | 9                  | 6     | 4      | 22.04                  | 4     |
| 42  | <i>Leea indica</i> (Burm.f) Merr./<br>Vitaceae/E/N                | Bandicoot berry/Girang,<br>ki tuwa, temali laki | 3                  | 3     | 3      | 14.50                  | 5     |
| 43  | <i>Litsea resinosa</i> Blume/Lauraceae<br>/E/N                    | Medang bedaka                                   | 1                  | 1     | 1      | 4.83                   | 4     |
| 44  | <i>Mangifera applanata</i> Kosterm/<br>Anacardiaceae/E/N          | Asem depah, asem<br>kepeng, pelipisan           | 1                  | 1     | 1      | 4.83                   | 2     |
| 45  | <i>Mangifera caesia</i> Jack ex Wall./<br>Anacardiaceae/E/N       | Wani, wani Bali, mangga<br>binjai               | 3                  | 3     | 2      | 10.80                  | 5     |
| 46  | <i>Mangifera kamanga</i> Blume<br>Anacardiaceae/E/N               | Kemang                                          | 5                  | 4     | 2      | 12.07                  | 5     |
| 47  | <i>Mangifera laurina</i> Blume/<br>Anacardiaceae/E/N              | Pelem kecil, mangga pari                        | 7                  | 7     | 4      | 22.72                  | 4     |
| 48  | <i>Mangifera pajang</i> Kosterm./<br>Anacardiaceae/E/N            | Bambangan, Mangga<br>pajang                     | 1                  | 1     | 1      | 4.83                   | 5     |
| 49  | <i>Mangifera sp.</i> /Anacardiaceae/E/N                           | Pelem wulung, mangga<br>hitam                   | 5                  | 4     | 4      | 19.48                  | 5     |
| 50  | <i>Medinilla speciosa</i> Reinw. ex Blume/<br>Melastomataceae/R/N | Parijoto, trijata                               | 2                  | 2     | 2      | 9.67                   | 5     |
| 51  | <i>Myristica argentea</i> Warb/<br>Myristicaceae/E/N              | Papuan nutmeg/Pala<br>fakfak, pala papua        | 3                  | 1     | 1      | 5.13                   | 5     |
| 52  | <i>Myristica fatua</i> Houtt/<br>Myristicaceae/E/N                | Wild nutmeg/Pala utan,<br>mendarahan            | 2                  | 1     | 1      | 4.98                   | 5     |
| 53  | <i>Nephelium mutabile</i> Blume/<br>Sapindaceae/E/N               | Pulasan/Kapulasan,<br>rambutan botak,           | 3                  | 2     | 2      | 9.81                   | 5     |
| 54  | <i>Palaquium leiocarpum</i> Boerl./<br>Sapotaceae/E/N             | Jongkang, nyatoh jangkar                        | 2                  | 2     | 2      | 9.67                   | 5     |
| 55  | <i>Palaquium obovatum</i> (Griff.) Engl./<br>Sapotaceae/E/N       | Kempo, osi                                      | 3                  | 3     | 3      | 14.50                  | 1     |
| 56  | <i>Pandanus brossimos</i> Merr. & Perry/<br>Pandanaaceae/E/N      | Kelapa hutan, woromo,<br>tuke                   | 1                  | 1     | 1      | 4.83                   | 2     |
| 57  | <i>Pandanus conoideus</i> Lam/<br>Pandanaaceae/E/N                | Red fruit/Buah merah,<br>saik-eken              | 2                  | 1     | 1      | 4.98                   | 6     |
| 58  | <i>Pandanus julianettii</i> Mart./<br>Pandanaaceae/E/N            | Karuka/Kelapa hutan,<br>gawen, tuke, saluke     | 2                  | 1     | 1      | 4.98                   | 2     |
| 59  | <i>Pangium edule</i> Reinw./<br>Achariaceae/R/N                   | Pangi/Picung, klewek,<br>kalawak                | 6                  | 5     | 2      | 13.20                  | 6     |
| 60  | <i>Parkia javanica</i> Lam/Fabaceae/E/N                           | Tree bean/kupang<br>Kedaung, kedhawung          | 1                  | 1     | 1      | 4.83                   | 5     |
| 61  | <i>Passiflora edulis</i> Sims./<br>Passifloraceae/C/I             | Passion fruit/Buah negri,<br>tiga negri         | 4                  | 3     | 3      | 14.65                  | 6     |
| 62  | <i>Passiflora lingularis</i> L./<br>Passifloraceae/R/I            | Passion fruit/Markisa                           | 2                  | 1     | 1      | 4.98                   | 2     |
| 63  | <i>Phoenix canariensis</i> /Arecaceae/R/I                         | Canary date/Kurma<br>kenari                     | 21                 | 7     | 2      | 17.40                  | 1     |
| 64  | <i>Phyllanthus acidus</i> (L.) Skeells/<br>Phyllanthaceae/E/N     | Star berry/Ceremai,<br>cermai                   | 18                 | 8     | 2      | 17.93                  | 4     |
| 65  | <i>Phyllanthus emblica</i> L./<br>Phyllanthaceae/E/I              | Emblic, gooseberry/<br>Malaka, kemloko          | 3                  | 1     | 1      | 5.13                   | 5     |
| 66  | <i>Pometia tomentosa</i> T & B/<br>Sapindaceae/E/N                | Lengsir                                         | 7                  | 5     | 3      | 17.05                  | 6     |

| No. | Species/Family/Status <sup>z</sup> /Origin <sup>y</sup>                   | Common/Local name                             | Distribution freq. |       |        | Score (%) <sup>x</sup> | Group |
|-----|---------------------------------------------------------------------------|-----------------------------------------------|--------------------|-------|--------|------------------------|-------|
|     |                                                                           |                                               | City               | Prov. | Region |                        |       |
| 67  | <i>Pouteria caimito</i> Radlk./ Sapotaceae/E/I                            | Abiu/ Sawo mangga                             | 1                  | 1     | 1      | 4.83                   | 5     |
| 68  | <i>Pouteria campechiana</i> Baehni/ Sapotaceae/E/I                        | Canistel, yellow sapote/ Alkesa, sawo mentega | 6                  | 5     | 3      | 16.91                  | 1     |
| 69  | <i>Prunus arborea</i> (Blume) Kalkman/ Rosaceae/E/N                       | Kenda, jenteli, kalana, hokio                 | 3                  | 3     | 3      | 14.50                  | 6     |
| 70  | <i>Prunus avium</i> L./Rosaceae/E/N                                       | Sweet cherry/Ceri burung                      | 2                  | 2     | 2      | 9.67                   | 4     |
| 71  | <i>Rubus moluccanus</i> L./Rosaceae/E/N                                   | Rubus/Rubus, ucen maluku                      | 1                  | 1     | 1      | 4.83                   | 5     |
| 72  | <i>Sararanga sinuosa</i> Hemsley/ Pandanaceae/E/N                         | Papuan grape/Anggur papua, selre              | 10                 | 8     | 4      | 24.15                  | 5     |
| 73  | <i>Schleichera oleosa</i> (Lour.) Oken/ Sapindaceae/E/N                   | Gum-lac tree/Kosambi, kesambi, pohon sirlak   | 16                 | 7     | 4      | 24.06                  | 4     |
| 74  | <i>Scorodocarpus borneensis</i> (Baill.) Becc/ Olacaceae/E/N              | Kulim/Kulim, kayu bawang, bawang hutan        | 2                  | 1     | 1      | 4.98                   | 5     |
| 75  | <i>Solanum betaceum</i> Cav./ Solanaceae/C/I                              | Tamarillo/terung belanda                      | 4                  | 4     | 3      | 15.63                  | 1     |
| 76  | <i>Stelechocarpus burahol</i> (Blume) Hook F & Thomson/ Anacardiaceae/E/N | Kepel, burahol                                | 2                  | 2     | 1      | 5.96                   | 4     |
| 77  | <i>Sterculia shillinglawii</i> F.Muell/ Malvaceae/E/N                     | Wild almond tree/Woton, pinpin, kelumpang,    | 8                  | 4     | 3      | 16.22                  | 4     |
| 78  | <i>Syzygium cymosum</i> (Lam.) DC./ Myrtaceae/E/N                         | Mantingan, jambu kopo, kisireum               | 6                  | 6     | 4      | 21.59                  | 4     |
| 79  | <i>Syzygium jambos</i> Linn./Myrtaceae/E/N                                | Rose apple/Jambu mawar                        | 9                  | 8     | 4      | 24.00                  | 1     |
| 80  | <i>Syzygium laxiflorum</i> (Blume) DC/ Myrtaceae/E/N                      | Mpui, merik                                   | 1                  | 1     | 1      | 4.83                   | 2     |
| 81  | <i>Syzygium polycephalum</i> (Mig.) Merr & Perry/Myrtaceae/E/N            | Gowok, kupa, kali asem, ruruhi                | 1                  | 1     | 1      | 4.83                   | 5     |
| 82  | <i>Triphasia trifolia</i> / Rutaceae/E/I                                  | Lime berry/Jeruk kinkit merah                 | 4                  | 4     | 3      | 15.63                  | 4     |
| 83  | <i>Ziziphus mauritiana</i> Lam./ Rhamnaceae/E/N                           | Jujube/Bidara, widara, kom                    | 1                  | 1     | 1      | 4.83                   | 3     |

<sup>z</sup>A—Abundant; C—Commercial; E—Endangered; R—Rare; <sup>y</sup>I—Introduced species; N—Native species; Inv—Invasive species; <sup>x</sup>Score was calculated from (%city + %province + %island)/3, where RD: score 0-25%, LC: 26-50%, Co: 51-75%, VC: 76-100%; <sup>w</sup>No common name was identified; Group—grouping in quadrant corresponding to Figure 6.
