# Supplementary material
Source: MDPI journal article supplement (https://www.mdpi.com/2071-1050/13/14/7835)
Supplement: s1 [file s1 › Table S5 Revision track changes-edited.pdf]

**Table S5.** List of FTS designated as iconic by provinces/municipalities/regencies and score of availability.

| No.                               | Species identity <sup>z</sup>                                                         | Province/Municipality/Regency <sup>y</sup> | Score of availability (%) <sup>x</sup> | Note                      |
|-----------------------------------|---------------------------------------------------------------------------------------|--------------------------------------------|----------------------------------------|---------------------------|
| <i>Province level</i>             |                                                                                       |                                            |                                        |                           |
| 1                                 | <i>Borassus flabellifer</i> L. (Palmae/lontar, siwalan)                               | Sulawesi Selatan                           | 50.00<br>(n = 4)                       |                           |
| 2                                 | <i>Bouea macrophylla</i> Griffith (Anacardiaceae/gandaria)                            | Jawa Barat                                 | 23.08<br>(n = 13)                      |                           |
| 3                                 | <i>Ficus minahasae</i> Teijsman & de Vriese (Moraceae/Fig of Borneo/Langusai)         | Sulawesi Utara                             | NA<br>(n = 3)                          |                           |
| 4                                 | <i>Lansium domesticum</i> Corr. (Meliaceae/duku)                                      | Sumatera Selatan                           | 80.00<br>(n = 10)                      |                           |
| 5                                 | <i>Mangifera casturi</i> Kosterm. (Anacardiaceae/mango/mangga kasturi)                | Kalimantan Selatan                         | 100.00<br>(n = 4)                      |                           |
| 6                                 | <i>Morus macroura</i> Miq. (Moraceae/morus/murbei)                                    | Sumatera Barat                             | NA<br>(n = 9)                          |                           |
| 7                                 | <i>Nephelium lappaceum</i> L. (Sapindaceae/rambutan)                                  | Kalimantan Tengah                          | 20.00<br>(n = 5)                       |                           |
| 8                                 | <i>Pometia pinnata</i> (Sapindaceae/matoa)                                            | Papua Barat                                | 60.00<br>(n = 5)                       |                           |
| 9                                 | <i>Salacca zalacca</i> Reinw. (Arecaceae/salak condet)                                | DKI Jakarta                                | NA<br>(n = 5)                          |                           |
| 10                                | <i>Stelechocarpus burahol</i> (Blume) Hook. & Thomson (Annonaceae/kepel)              | DI Yogyakarta                              | NA<br>(n = 5)                          |                           |
| <i>Regency/Municipality level</i> |                                                                                       |                                            |                                        |                           |
| 1                                 | <i>Aegle marmelos</i> (L.) Corr. (Rutaceae/Buah maja legi)                            | Kota Mojokerto, EJ                         | NS                                     |                           |
| 2                                 | <i>Ananas comosus</i> (L.) Merr. cv Subang (Bromeliaceae/pineapple/ Nanas subang)     | Subang, WJ                                 | NA                                     |                           |
| 3                                 | <i>Ananas comosus</i> cv Blitar (Bromeliaceae/Nanas Blitar)                           | Blitar, EJ                                 | NA                                     | Species similar to no. 2  |
| 4                                 | <i>Annona squamosa</i> (Annonaceae/sweetsop/srikaya)                                  | Pamekasan, EJ                              | NS                                     |                           |
| 5                                 | <i>Artocarpus altilis</i> Parkinson (Moraceae /breadfruit/sukun)                      | Tulungagung, EJ                            | NS                                     |                           |
| 6                                 | <i>Artocarpus altilis</i> Parkinson cv Cilacap (Moraceae/ breadfruit/sukun Cilacap)   | Cilacap, CJ                                | 100                                    | Species similar to no. 5  |
| 7                                 | <i>Artocarpus heterophyllus</i> (Moraceae/jackfruit/nangka)                           | Batang, CJ                                 | 100                                    |                           |
| 8                                 | <i>Artocarpus heterophyllus</i> cv Genjah (Moraceae/jackfruit/ nangka genjah)         | Nganjuk, EJ                                | 100                                    | Species similar to no. 7  |
| 9                                 | <i>Averrhoa carambola</i> cv Demak (Oxalidaceae/star fruit/belimbing Demak)           | Demak, CJ                                  | 100                                    |                           |
| 10                                | <i>Averrhoa carambola</i> cv Dewi (Oxalidaceae/star fruit/belimbing Dewi)             | Kota Depok, WJ                             | NA                                     | Species similar to no. 9  |
| 11                                | <i>Canarium sp.</i> (Burseraceae/canarium/Kenari Alor)                                | Alor, NTT                                  | 100                                    |                           |
| 12                                | <i>Canarium vulgare</i> Leenh. (Burseraceae/canarium/ kenari Bogor)                   | Kota Bogor WJ                              | 100                                    |                           |
| 13                                | <i>Carica pubescens</i> Lenne & K Koch (Caricaceae/ carica/pepaya Dieng)              | Wonosobo, CJ                               | NA                                     |                           |
| 14                                | <i>Castanopsis argentea</i> Blume (Fagaceae/saninten)                                 | Bondowoso, EJ                              | NS                                     |                           |
| 15                                | <i>Citrus maxima</i> (Burm.) Merr. cv Cikoneng (Rutaceae/pamelo/Jeruk besar Cikoneng) | Sumedang WJ                                | NA                                     |                           |
| 16                                | <i>Citrus maxima</i> cv nambangan (Rutaceae/pamelo/ Jeruk Nambangan)                  | Kota Madiun, EJ                            | NA                                     | Species similar to no. 15 |
| 17                                | <i>Citrus maxima</i> cv nambangan (Rutaceae/pamelo/Jeruk Nambangan)                   | Madiun, EJ                                 | NA                                     | Species similar to no. 15 |
| 18                                | <i>Citrus reticulata</i> Blanco cv Keprok Garut (Rutaceae/ tangerine/ Jeruk keprok)   | Garut, WJ                                  | NS                                     |                           |

|    |                                                                                             |                      |     |                           |
|----|---------------------------------------------------------------------------------------------|----------------------|-----|---------------------------|
| 19 | <i>Cocos nucifera</i> cv genjah (Arecaceae/coconut/kelapa genjah entog)                     | Kebumen, CJ          | 100 |                           |
| 20 | <i>Cocos nucifera</i> cv merah jombang (Arecaceae/coconut/kelapa merah jombang)             | Jombang, EJ          | 100 | Species similar to no. 19 |
| 21 | <i>Dimocarpus logan</i> Lour (Sapindaceae/longan/lengkeng)                                  | Semarang, CJ         | 100 |                           |
| 22 | <i>Diospyros blancoi</i> A. DC. (Ebenaceae/velvet apple/samolo, bisbul)                     | Cianjur WJ           | NA  |                           |
| 23 | <i>Durio zibethinus</i> cv Tawang (Malvaceae/durian/durian Tawang)                          | Magetan, EJ          | NS  |                           |
| 24 | <i>Durio zibethinus</i> cv Petruk (Malvaceae/durian/durian Petuk)                           | Jepara, CJ           | NA  | Species similar to no. 23 |
| 25 | <i>Garcinia mangostana</i> L. cv. Kaligesing (Guttiferaceae/mangosteen/ manggis kaligesing) | Purworejo, CJ        | NS  |                           |
| 26 | <i>Inocarpus fagiferus</i> (Parkinson) Fosberg (Fabaceae/tahitian chesnut/gayam)            | Bojonegoro, EJ;      | NS  |                           |
| 27 | <i>Inocarpus fagiferus</i> (Parkinson) Fosberg (Fabaceae/tahitian chesnut/gayam)            | Kota Cirebon WJ      | NA  | Species similar to no. 26 |
| 28 | <i>Lansium domesticum</i> cv Mateseh (Meliaceae/duku/Duku Mataseh)                          | Karanganyar, CJ      | NS  |                           |
| 29 | <i>Limonia acidissima</i> L. syn. <i>Feronia limonia</i> (Rutaceae/kawista)                 | Rembang, CJ          | NA  |                           |
| 30 | <i>Malus domestica</i> Borkh (Rosaceae/apple/apel batu)                                     | Kota Batu, EJ        | NA  |                           |
| 31 | <i>Malus domestica</i> Borkh cv batu manalagi (Rosaceae/apple/apel batu manalagi)           | Malang, EJ           | NA  | Species similar to no. 30 |
| 32 | <i>Mangifera indica</i> cv gadung (Anacardiaceae/mango/mangga gadung)                       | Kota Pasuruan, EJ    | 100 |                           |
| 33 | <i>Mangifera indica</i> cv manalagi (Anacardiaceae/mango/mangga manalagi)                   | Kota Probolinggo, EJ | 100 | Species similar to no. 32 |
| 34 | <i>Mangifera indica</i> cv Wirasangka (Anacardiaceae/mango/mangga Wirasangka)               | Tegal, CJ            | 100 | Species similar to no. 32 |
| 35 | <i>Mangifera indica</i> L. cv 'Gedong gincu (Anacardiaceae/mango/mangga gadong gincu)       | Cirebon WJ           | 100 | Species similar to no. 32 |
| 36 | <i>Mangifera indica</i> L. cv 'Indramayu (Anacardiaceae/mango/ mangga Dermayu)              | Indramayu WJ         | 100 | Species similar to no. 32 |
| 37 | <i>Mangifera kemanga</i> Blume (Anacardiaceae/kemang/kemang)                                | Bogor, WJ            | 100 |                           |
| 38 | <i>Mangifera odorata</i> Griff (Anacardiaceae/sour mango/kweni)                             | Gresik, EJ           | NA  |                           |
| 39 | <i>Morinda citrifolia</i> Linn (Rubiaceae/pace, mengkudu)                                   | Pacitan, EJ          | NS  |                           |
| 40 | <i>Musa AAB</i> cv pisang Agung (Musaceae/banana/pisang Agung)                              | Lumajang, EJ         | NS  |                           |
| 41 | <i>Myristica fragrans</i> Houtt. (Myristicaceae/nutmeg/Pala Banda)                          | Kota Sukabumi WJ     | 100 |                           |
| 42 | <i>Nephelium lappaceum</i> L. (Sapindaceae/rambutan)                                        | Kota Blitar, EJ      | NS  |                           |
| 43 | <i>Pangium edule</i> (Flacourtiaceae/picung, pucung, klewek)                                | Trenggalek, EJ       | NS  |                           |
| 44 | <i>Phyllanthus acidus</i> (L.) Skeells (Phyllanthaceae/ceremai)                             | Ngawi, EJ            | NS  |                           |
| 45 | <i>Salacca zalacca</i> cv Bangkalan (Arecaceae/salak Bangkalan)                             | Bangkalan, EJ        | 100 | Species similar to no. 9  |
| 46 | <i>Salacca zalacca</i> cv kersikan (Arecaceae/salak Kersikan)                               | Pasuruan, EJ         | NS  | Species similar to no. 9  |
| 47 | <i>Salacca zalacca</i> cv Nglumut (Arecaceae/salak Nglumut)                                 | Magelang, CJ         | 100 | Species similar to no. 9  |
| 48 | <i>Sandoricum koetjape</i> (Burm.f.) Merr. (Meliaceae/kecapi, sentul)                       | Kota Bekasi WJ       | 100 |                           |

|    |                                                                                                 |                   |     |                           |
|----|-------------------------------------------------------------------------------------------------|-------------------|-----|---------------------------|
| 49 | <i>Syzygium jambos</i> (Myrtaceae/rose apple/jambu mawar, jambu kraton)                         | Sampang, EJ       | NS  |                           |
| 50 | <i>Syzygium aqueum</i> (Burm.f.) Alston cv Cincalo (Myrtaceae/cincalo/jambu cincalo)            | Karawang WJ       | NS  |                           |
| 51 | <i>Syzygium cumini</i> (L.) Skeells (Myrtaceae/jamblang, duwet, jambu kalang)                   | Purbalingga, CJ   | NS  |                           |
| 52 | <i>Syzygium mallaccense</i> (L.) Merr. & Perry (Myrtaceae/malay apple/jambu bol, jambu dersono) | Kudus, CJ         | NA  |                           |
| 53 | <i>Tamarindus indica</i> L. (Fabaceae/tamarind/asam jawa)                                       | Kota Semarang, CJ | 100 |                           |
| 54 | <i>Vitis vinifera</i> (Vitaceae/grape/anggur kuning)                                            | Kota Kediri, EJ   | NS  |                           |
| 55 | <i>Vitis vinifera</i> cv Probolinggo biru (Vitaceae/grape/anggur biru)                          | Probolinggo EJ    | NS  | Species similar to no. 54 |

<sup>y</sup>City name with “Kota” means center of municipality, the other means regency; <sup>x</sup>NA—not available; NS—not studied due to lack of data; n = number of studied cities; <sup>z</sup>found at least a single plant.
