# Supplementary material
Source: MDPI journal article supplement (https://www.mdpi.com/2071-1050/13/14/7835)
Supplement: s1 [file s1 › Table S6 Revision-edited.xlsx]

## Sheet: Species by cities
	Table S6. List of FTS by city and province.
	No.	Species	[Family]	[Common]	[Indonesian]	Banten province							DKI Province						Jawa Barat														Jawa Tengah
						Rangkasbitung	Pandeglang	Kota Cilegon	Serang	Kota Tangerang	Kota Tangerangselatan		Jakarta Pusat	Jakarta Utara	Jakarta Barat	Jakarta Selatan	Jakarta Timur		Kota Bogor	Depok	Bekasi	Sukabumi	Cianjur	Subang	Bandung	Sumedang	Majalengka	Kota Cirebon	Kuningan	Tasikmalaya	Banjar		Purwokerto	Banjarnegara	Wonosobo	Mungkid	Cilacap	Kebumen	Kota Surakarta	Kota Salatiga	Wonogiri	Kota Tegal	Batang	Purwodadi	Kudus	Kota Semarang	Demak	Jepara	Rembang
						[1]	[1]	[1]	[1]	[1]	[1]		[2]	[1]	[1]	[2]	[1]		[2]	[1]	[1]	[1]	[1]	[1]	[1]	[1]	[1]	[1]	[2]	[1]	[1]		[2]	[2]	[2]	[2]	[1]	[1]	[1]	[1]	[1]	[1]	[1]	[1]	[1]	[1]	[1]	[1]	[1]
	1	Aegle marmelos (L.) Corr.	Rutaceae		Buah maja legi		1																	1															1										1
	2	Aleurites moluccanus (L.) Willd.	Euphorbiaceae	candlenuts	kemiri, muncang		1						1				1								1
	3	Anacardium occidentale L.	Anacardiaceae	cashew nut	jambu mete, jambu monyet			1																1							1							1	1		1
	4	Ananas comosus (L.) Merr.	Bromeliaceae	pineapple	nanas
	5	Annona glabra L.	Annonaceae	pond apple, Aligator apple	Serba rasa	1																					1											1	1
	6	Annona muricata L.	Annonaceae	soursop	sirsak, nangka sabrang, nangka londo	1	1	1	1	1	1					1			1	1		1	1	1		1	1	1	1	1	1		1	1	1		1	1	1	1	1	1		1			1		1
	7	Annona reticulata L.	Annonaceae	custard apple, bull’s heart	buah nona, srikaya	1	1	1		1					1		1		1	1		1	1			1	1	1		1	1								1		1	1		1	1	1	1	1	1
	8	Antidesma bunius (L.) Spreng.	Phyllanthaceae	bignai, Queensland-cherry	buni		1		1				1				1		1	1	1			1	1					1	1								1		1					1
	9	Antidesma ghaesembilla Gaern	Phyllanthaceae		pune (parepare), mayam (kalsel)
	10	Archidendron jiringa (Jack) I. C. Nielsen)	Fabaceae		jiringa, jengkol	1	1		1										1		1	1
	11	Ardisia elliptica Thunb.	Primulaceae	shoebutton, inkberry	wuni, buni keraton, lempeni					1
	12	Arenga pinnata (Wurmb.) Merr.	Arecaceae	sugar palm	aren, enau, kawung			1														1		1						1										1
	13	Arthocarpus altilis (Parkinson) Fosberg /A. communis	Moraceae	breadfruit	sukun	1	1	1	1	1	1				1	1	1		1			1	1	1	1	1	1	1	1	1			1	1	1	1	1	1	1	1	1		1	1		1	1		1
	14	Arthocarpus camansi Blanco	Moraceae	breadnut	keluwih, kluwih		1													1														1
	15	Arthocarpus elasticus Reinw.	Moraceae		benda, tarok, teureup, tipulu, tarap	1	1				1				1				1		1
	16	Arthocarpus heterophyllus Lam.	Moraceae	jackfruit	nangka	1	1	1	1	1	1		1	1	1	1	1		1	1	1	1	1	1	1	1	1	1	1	1	1		1	1	1	1	1	1	1	1	1	1	1	1	1	1	1	1	1
	17	Arthocarpus integer Spreng.	Moraceae		cempedak		1				1
	18	Arthocarpus rigidus Blume	Moraceae	monkey jackfruit	pussar, mandalika, mandalika kujan, nangka tempunik, tempunit
	19	Averrhoa bilimbi L	Oxalidaceae		belimbing wuluh	1	1	1	1	1	1			1	1		1		1		1		1	1		1	1	1					1	1				1	1	1	1	1	1		1	1	1	1	1
	20	Averrhoa carambola L.	Oxalidaceae	star fruit	belimbing	1	1	1	1	1	1			1		1	1		1		1	1		1		1	1		1	1	1		1	1	1		1	1	1	1	1	1	1	1	1	1	1	1	1
	21	Baccaurea racemosa (Reinw.) Muell. Arg	Phyllanthaceae		menteng, kepundung, mundung, bencoy								1								1				1
	22	Baccaurea sp (B. macrocarpa)	Phyllanthaceae		menteng nagari, rabai, cupak, rambai				1
	23	Bellucia pentamera Naudin	Melastomataceae		Jambu hutan, jambu tangkalak, jambu akasia
	24	Borassus aethiopum Mart.	Arecaceae	Afrikan fan palm, ron palm, toddy palm
	25	Borassus flabellifer L.	Arecaceae	Palmyra palm, tala palm, toddy palm	siwalan, lontar, lontara, tala			1								1
	26	Borassus heineanus Becc.	Arecaceae		Palem lontar irian, palem kipas, kelapa hutan, waribo																																					1
	27	Bouea macrophylla Griffith	Anacardiaceae	marian plum	gandaria, ramania, jatake														1	1	1																	1
	28	Breynia cernua (Poir.) Mull.Arg. Mueller Argoviensis	Phyllanthaceae	breynia, coffee bush	tandangolu
	29	Bruguiera gymnorrhiza Lamk	Rhizophoraceae		tanjang merah, aibon, parepat darat, parai, salak-salak
	30	Burckella obovata (G. Forst.) Pierre	Sapotaceae		Nyatoh, buah kaum, takun
	31	Calophyllum soulattri Burm. f.	Calophyllaceae		Bintangor, ntorang, nyanyamplungan
	32	Canarium commune L.	Burseraceae	java almond, kenari nut	kenari, kenari Bogor					1	1						1		1	1	1	1	1	1	1				1	1			1	1			1		1	1					1
	33	Canarium decumanum Gaertn.	Burseraceae		kenari Singkawang, kenay NTT
	34	Carica papaya L	Caricaceae	papaya	pepaya	1	1	1	1				1	1	1	1						1	1	1		1	1			1	1			1	1		1	1	1	1	1		1	1	1		1		1
	35	Castanopsis acuminatissima (Blume) A. DC	Fagaceae	papua oak	Ki riung anak, ki anak, riung anak, heye
	36	Citrus aurantifolia (Christm.) Swingle	Rutaceae		Jeruk nipis	1	1																1										1					1		1	1					1			1
	37	Citrus grandis Osbeck	Rutaceae	pamelo	jeruk bali				1		1																		1		1							1				1			1
	38	Citrus sinensis L. Osbeck	Rutaceae	sweet orange	jeruk manis	1	1																				1	1		1	1		1							1			1				1		1
	39	Citrus limon (L.) Burm.f.	Rutaceae	Lemon	Jeruk lemon, jeruk sitrun									1									1					1			1
	40	Cocos nucifera	Arecaceae	coconut	kelapa	1	1	1	1	1	1		1	1	1	1	1		1			1	1	1		1	1		1	1	1		1		1	1	1	1	1	1	1		1	1	1	1	1	1	1
	41	Coffea arabica L.	Rubiaceae	coffee	kopi	1														1														1
	42	Coffea excelca L.	Rubiaceae		Kopi ekselsa
	43	Crysophyllum cainito L.	Sapotaceae	star apple	sawo duren, sawo ijo, sawo manila, kenitu, genitu	1	1		1		1					1			1		1		1			1			1				1						1	1					1
	44	Cynometra cauliflora L.	Fabaceae		namu-namu, nam-nam, pukih		1									1			1																				1
	45	Dimorcarpus longan (Lour.) Steud	Sapindaceae	longan	kelengkeng, lengkeng	1	1	1	1	1				1		1			1	1	1	1	1		1	1	1	1		1	1			1	1	1	1	1	1	1	1	1	1	1	1	1	1	1	1
	46	Diospyros blancoi A.DC.	Ebenaceae	velvet apple, mabolo	bisbul, sembolo		1				1				1		1		1		1			1		1			1				1						1		1		1				1
	47	Diospyros kaki L.f	Ebenaceae	persimmon	kesemek, semek								1
	48	Dracontomelon dao (Blanco) Merr. & Rolfe	Anacardiaceae	pacific walnut	rao, dahu, sengkuang
	49	Durio acutifolius (Mast.) Kosterm	Bombacaceae		durian burung
	50	Durio dulcis Becc	Bombacaceae		lai
	51	Durio kutejensis (Hassk.) Becc.	Bombacaceae		lahung, durian merah
	52	Durio oxleyanus Griffith	Bombacaceae		isu, karantungan, durian sukang, durian daun
	53	Durio zybethinus	Bombacaceae	durian	durian		1		1		1					1			1		1	1	1	1		1	1		1	1	1		1	1	1	1		1	1	1
	54	Elaeocarpus floribundus Bl.	Elaeocarpaceae		Damu
	55	Elaeocarpus sphaericus (Gaertn.) K. Schum)	Elaeocarpaceae	rudraksha	ninto
	56	Elattostachys verrucosa (Blume) Radlk.	Sapindaceae		lowe api
	57	Enterolobium cyclocarpum (Jacq.) Griseb.	Fabaceae	guanacaste, elephant-ear tree	sengon buto															1
	58	Eriobotrya japonica (Thunb.) Lindl.	Rosaceae	loquat	biwa, lokat, loukat														1
	59	Eugenia uniflora Lam	Myrtaceae	pitanga	dewandaru	1	1															1				1			1
	60	Ficus carica	Moraceae	Fig tree	Buah tin
	61	Ficus fistulosa Reinw	Moraceae		Labe, benying, beunying , ai yumbul
	62	Ficus fulva Reinw. ex Bl.	Moraceae		Lento, hamerang minyak, kebeg lenga
	63	Ficus punctata Thunb.	Moraceae		Menca, ki batara
	64	Ficus racemosa L	Moraceae	Indian fig tree	loa, elo	1	1	1	1				1			1	1		1	1	1								1	1
	65	Ficus variegata Blume	Moraceae	red stem fig	ara, gondang, nyawai														1																1				1
	66	Flacourtia inermis Roxb.	Salicaceae	batoko plum	lobi lobi								1						1		1
	67	Flacourtia rukam Zoll. & Moritzi	Salicaceae	rukam	rakem, rukem
	68	Garcinia celebica L.	Clusiaceae	seashore mangosteen	baros, kalawet, mangggis hutan, sungkep, mandula
	69	Garcinia dulcis (Roxb.) Kurz	Clusiaceae	yellow mangosteen	mundu, badung								1						1		1												1						1
	70	Garcinia mangostana L	Clusiaceae	mangosteen	manggis	1	1												1	1	1	1				1	1							1					1	1
	71	Garcinia xanthochymus Hook. f. ex T. Anders	Clusiaceae		asam kandis, asam gelugur																1
	72	Gnetum gnemon Linn.	Gnetaceae	gnetum seed	melinjo, belinjo		1	1	1		1				1				1	1					1	1			1	1			1					1	1	1	1					1		1	1
	73	Hylocereus undatus (Haworth) Britton & Rose	Cactaceae	dragon fruit, pitaya	buah naga																			1
	74	Inga feuileei DC	Fabaceae		Buah es
	75	Inocarpus edulis Forst/Inocarpus fagiferus (Parkinson) Fosberg	Fabaceae	Tahitian chesnut	gayam, gayang																																		1
	76	Lannea coromandelica (Houtt.) Merr.	Anacardiaceae	Indian ash tree, gurjon	kudo reo, kudo, reo, ki kuda, kedondong laki, jaranan, kayu jawa			1		1														1			1	1													1	1		1	1		1		1
	77	Lansium domesticum Corr	Meliaceae	dokoo	duku	1	1													1	1								1	1	1									1						1
	78	Lansium parasiticum (Osbeck) K.C. Sahni & Bennet	Meliaceae		langsat, langsep, kokosan	1	1																																	1
	79	Laucaena leucocephala (Lam.) de Wit	Fabaceae	river tamarind	mlanding, kemlandingan	1	1	1	1	1	1			1			1		1	1	1	1	1	1	1	1	1	1	1	1						1		1	1		1		1		1	1	1		1
	80	Leea indica (Burm.f) Merr.	Vitaceae	bandicoot berry	Girang, ki tuwa, kayu tuwa, mali-mali, temali laki
	81	Litchi chinensis Sonn.	Sapindaceae	lychee	leci														1	1	1
	82	Litsea resinosa Blume	Lauraceae		medang bedaka
	83	Mangifera applanata Kosterm	Anacardiaceae		Asem depah, asem kepeng, pelipisan, pau poco
	84	Mangifera caesia Jack ex Wall.	Anacardiaceae	machang	wani Bali, mangga binjai
	85	Mangifera casturi Kosterm	Anacardiaceae	casturi mango	mangga kasturi, kesturi										1											1				1									1
	86	Mangifera foetida Lour	Anacardiaceae	horse mango	limus, bacang, embacang	1	1				1								1	1	1	1	1			1				1	1		1						1	1		1						1	1
	87	Mangifera indica L.	Annacardiaceae	mango	mangga	1	1	1	1	1	1		1	1	1	1	1		1	1	1	1	1	1	1	1	1	1	1	1	1		1	1	1	1	1	1	1	1	1	1	1	1	1	1	1	1	1
	88	Mangifera kamanga Blume	Anacardiaceae		kemang		1	1
	89	Mangifera laurina Blume	Annacardiaceae		Mangga hutan, mangga pari, pelem kecik
	90	Mangifera pajang Kosterm.	Anacardiaceae		mangga pajang, bambangan
	91	Mangifera sp.	Annacardiaceae		Mangga hitam, mangga wulung
	92	Mangifera x odorata Griffith	Anacardiaceae		kwini, kweni, kuwini	1			1							1													1
	93	Manilkara kauki (L.) Duby (Sapot)	Sapotaceae		sawo kecik			1		1			1	1	1	1	1		1		1			1	1			1	1	1	1		1		1		1		1	1	1	1		1	1	1	1	1	1
	94	Manilkara zopota L.	Sapotaceae	sapodilla	sawo														1	1	1		1			1	1			1	1						1	1	1		1	1	1					1	1
	95	Medinilla speciosa Reinw. ex Blume	Melastomataceae		trijata, parijotho
	96	Mimusops elengi Linn	Sapotaceae		tanjung	1	1		1	1	1		1	1	1	1	1		1	1		1	1		1	1			1		1		1	1	1	1	1	1	1	1		1	1	1	1	1	1	1	1
	97	Morinda citrifolia L	Rubiaceae	Morinda	mengkudu, pace	1	1		1	1	1			1	1	1	1		1	1	1			1		1			1	1	1			1	1	1		1		1			1	1	1	1	1		1
	98	Morus indica L	Moraceae	mulberry	murbei, arbei		1	1	1		1											1													1
	99	Muntingia calabura L.	Muntingiaceae	calabur tree	kersen, talok	1	1	1	1	1	1			1	1		1		1	1	1	1	1	1	1	1	1	1	1	1	1		1	1		1	1	1	1	1	1	1	1	1	1		1	1	1
	100	Musa paradisiaca L	Musaceae	banana	pisang	1	1	1	1	1	1					1	1					1	1			1	1		1	1			1	1				1	1	1		1			1		1	1
	101	Myristica argantea Warb	Myristicaceae		pala fakfak, pala papua
	102	Myristica fatua Houtt	Myristicaceae	wild nutmeg	pala utan, mendarahan
	103	Myristica fragrans Houtt	Myristicaceae	nutmeg	pala, pala banda														1			1	1
	104	Nephelium lappaceum L.	Sapindaceae		rambutan	1	1	1	1		1								1	1	1	1	1	1	1	1	1		1	1	1		1	1		1		1	1	1	1		1						1
	105	Nephelium mutabile Blume	Sapindaceae		kapulasan, rambutan botak, tanggaring, maritam
	106	Palaquium leiocarpum Boerl.	Sapotaceae		jongkang, hangkang, nyatoh jangkar
	107	Palaquium obovatum(Griff.) Engl.	Sapotaceae		Kempo, osi														1
	108	Pandanus brossimos Merr. & Perry	Pandanaceae		Kelapa hutan, woromo, tuke
	109	Pandanus conoideus Lam	Pandanaceae	Red fruit	buah merah, saik-eken
	110	Pandanus julianettii Mart.	Pandanaceae		Kelapa hutan, gawen, tuke, saluke
	111	Pangium edule Reinw.	Achariaceae		picung, pucung, klewek, kalawak																									1										1
	112	Parkia javanica Lam	Fabaceae		kedaung, kedhawung															1
	113	Parkia speciosa Hassk	Fabaceae		petai	1	1	1	1								1					1		1	1	1	1	1			1		1	1			1		1	1	1							1
	114	Passiflora edulis Sims.	Passifloraceae	passion fruit	buah negri
	115	Passiflora lingularis L.	Passifloraceae	passion fruit	markisa
	116	Persea americana Mill	Lauraceae	avocado	alpokat	1	1	1	1		1				1	1				1	1		1		1	1	1			1	1		1				1	1			1	1	1	1		1	1
	117	Phoenix canariensis	Arecaceae	Canary date	Kurma kenari					1	1		1	1	1		1		1						1																	1				1	1		1
	118	Phoenix dactylifera	Arecaceae	Date	Kurma	1	1	1		1	1		1	1	1	1			1		1					1	1	1	1	1			1								1	1				1	1	1	1
	119	Phylanthus acidus (L.) Skeells	Phyllanthaceae	star bery	ceremai, cermai									1	1					1											1										1								1
	120	Phylantus emblica L.	Phyllanthaceae	emblic, amla, gooseberry	malaka, mloko, kemloko
	121	Pithecelobium dulce (Roxb.) Benth	Fabaceae	manila tamarind	asam keranji	1		1	1	1	1		1	1	1	1	1		1	1	1		1		1		1	1		1			1		1				1				1	1			1		1
	122	Pometia pinnata J. R & G. Forst	Sapindaceae	Fijian longan	matoa, kasai, kaili, tawang	1	1				1						1		1		1	1	1	1		1	1		1		1		1	1	1	1	1		1	1	1	1		1	1			1
	123	Pometia tomentosa T & B	Sapindaceae		lengsir																	1																			1
	124	Pouteria caimito Radlk.	Sapotaceae	abiu	sawo mangga
	125	Pouteria campechiana Baehni	Sapotaceae	canistel, yellow sapote	alkesa, kanistel, sawo mentega, sawo ubi, sawo Belanda																					1			1
	126	Prunus arborea (Blume) Kalkman	Rosaceae		Kenda, akil, jenteli, kalana, hokio
	127	Prunus avium L.	Rosaceae	sweet cherry	ceri burung											1
	128	Psidium guajava Linn.	Myrtaceae	guava	jambu biji	1	1	1	1		1			1			1			1	1	1	1	1		1	1	1	1	1				1	1	1	1		1	1	1	1	1	1		1			1
	129	Punica granatum L.	Lythraceae	pomegranate	delima	1				1							1						1	1					1	1	1								1			1			1	1			1
	130	Rubus moluccanus L	Rosaceae	rubus	rubus, ucen maluku
	131	Salacca zalacca	Arecaceae	snake fruit	salak				1													1														1				1
	132	Sandorium koetjape (Burm.f.) Merr.	Meliaceae	santol	kecapi, sentul						1								1		1
	133	Sararanga sinuosa Hemsley	Pandanaceae		anggur papua, selre											1
	134	Schleichera oleosa (Lour.) Oken	Sapindaceae	gum-lac tree	kesambi, kosambi, sirlak			1																															1		1			1					1
	135	Scorodocarpus borneensis (Baill.) Becc	Olacaceae		kulim, kayu bawang, bawang hutan
	136	Solanum betaceum Cav.	Solanaceae	tamarillo	terong belanda, terung belanda, terong mener
	137	Spondias dulcis L.	Anacardiaceae	ambarela	kedondong liar, kedondong kecil															1
	138	Spondias pinnata (L.f.) Kurz	Anacardiaceae	hog plum, wild mango	kedondong, dondong	1	1	1	1	1					1		1											1		1			1					1		1	1	1	1			1	1	1	1
	139	Stelechocarpus burahol (Blume) Hook F & Thomson	Anacardiaceae		kepel, burahol								1																										1
	140	Sterculia shillinglawii F.Muell	Malvaceae	wild almond tree	woton, kelumpang, pinpin, mandyagwe																																		1
	141	Syzygium aqueum Burm F	Myrtaceae	rose apple	jambu air	1		1	1	1	1		1	1	1	1	1		1	1	1	1	1	1	1	1	1	1	1	1	1		1	1	1	1	1	1	1	1	1	1	1	1	1	1	1	1	1
	142	Syzygium cumini (L.) Skeels	Myrtaceae	java plum	jamblang, duwet, jambu kalang, jambu kaliang, jambolan														1	1	1				1			1											1					1		1			1
	143	Syzygium cymosum (Lam.) DC.	Myrtaceae		jambu kopo, mantingan, kisireum																									1
	144	Syzygium jambos Linn.	Myrtaceae	rose apple	jambu mawar														1	1
	145	Syzygium laxiflorum	Myrtaceae		mpui, merik
	146	Syzygium mallaccense (L.) Merr. & Perry	Myrtaceae	malay apple	jambu bol, jambu dersono, jambu dipa, jambu jamaika, jambu rutong	1	1	1	1	1	1				1		1		1	1	1	1	1	1		1	1	1		1	1		1	1			1		1	1						1		1
	147	Syzygium polycephalum (Mig.) Merr & Perry	Myrtaceae		gowok, kupa, kali asem, ruruhi
	148	Tamarindus indica L.	Fabaceae	tamarind	asem jawa	1		1	1				1	1	1	1			1	1	1			1	1		1	1					1			1		1	1	1	1	1	1	1	1	1	1		1
	149	Theobroma cacao L.	Malvaceae	cocoa	kakao, coklat	1	1				1								1	1	1										1								1
	150	Triphasia trifolia	Rutaceae	Lime berry	jeruk kinkit merah
	151	Ziziphus mauritiana Lam. Syn Zizipus jujuba (L.) Gaertn	Rhamnaceae	jujube	bidara, widara, kom
		Total fruit species				42	46	33	34	25	33		19	20	24	25	27		47	35	39	30	29	29	21	33	29	22	29	36	30		30	23	18	16	19	27	46	35	32	25	22	22	22	26	26	20	34
		Total tree species found in the city				105	98	89	93	71	78		57	54	62	71	82		104	79	82	74	65	71	80	72	75	73	68	92	67		73	60	56	55	58	61	120	94	81	60	59	55	70	74	61	73	75
		Percentage fruit species (%)				40	46.9388	37.0787	36.5591	35.2113	42.3077		33.3333	37.037	38.7097	35.2113	32.9268		45.1923	44.3038	47.561	40.5405	44.6154	40.8451	26.25	45.8333	38.6667	30.137	42.6471	39.1304	44.7761		41.0959	38.3333	32.1429	29.0909	32.7586	44.2623	38.3333	37.234	39.5062	41.6667	37.2881	40	31.4286	35.1351	42.623	27.3973	45.3333
	Note: "1" means present, otherwise absent;
		[1] means obtained from car survey;
		[>1] obtained from reference, see the number.

## Sheet: species by province
	S4-B Table. List of fruit tree species by province in Indonesian cities
	No	Species	[family]	[common]	[Indonesian]							Banten province						DKI Province														Jawa Barat
						Rangkasbitung	Pandeglang	Kota Cilegon	Serang	Kota Tangerang	Kota Tangerangselatan		Jakarta Pusat	Jakarta Utara	Jakarta Barat	Jakarta Selatan	Jakarta Timur		Kota Bogor	Depok	Bekasi	Sukabumi	Cianjur	Subang	Bandung	Sumedang	Majalengka	Kota Cirebon	Kuningan	Tasikmalaya	Banjar		Purwokerto	Banjarnegara	Wonosobo	Mungkid	Cilacap	Kebumen	Kota Surakarta	Kota Salatiga	Wonogiri	Kota Tegal	Batang	Purwodadi	Kudus	Kota Semarang	Demak	Jepara	Rembang
						[1]	[1]	[1]	[1]	[1]	[1]		[2]	[1]	[1]	[2]	[1]		[2]	[1]	[1]	[1]	[1]	[1]	[1]	[1]	[1]	[1]	[2]	[1]	[1]		[2]	[2]	[2]	[2]	[1]	[1]	[1]	[1]	[1]	[1]	[1]	[1]	[1]	[1]	[1]	[1]	[1]
	1	Aegle marmelos (L.) Corr.	Rutaceae		Buah maja legi		1					16.6667						0						1								7.69231							1										1
	2	Aleurites moluccanus (L.) Willd.	Euphorbiaceae	candlenuts	kemiri, muncang		1					16.6667	1				1	40							1							7.69231
	3	Anacardium occidentale L.	Anacardiaceae	cashew nut	jambu mete, jambu monyet			1				16.6667						0						1							1	15.3846						1	1		1
	4	Ananas comosus (L.) Merr.	Bromeliaceae	pineapple	nanas							0						0														0
	5	Annona glabra L.	Annonaceae	pond apple, Aligator apple	Serba rasa	1						16.6667						0									1					7.69231						1	1
	6	Annona muricata L.	Annonaceae	soursop	sirsak, nangka sabrang, nangka londo	1	1	1	1	1	1	100				1		20	1	1		1	1	1		1	1	1	1	1	1	84.6154	1	1	1		1	1	1	1	1	1		1			1		1
	7	Annona reticulata L.	Annonaceae	custard apple, bull’s heart	buah nona, srikaya	1	1	1		1		66.6667			1		1	40	1	1		1	1			1	1	1		1	1	69.2308							1		1	1		1	1	1	1	1	1
	8	Antidesma bunius (L.) Spreng.	Phyllanthaceae	bignai, Queensland-cherry	buni		1		1			33.3333	1				1	40	1	1	1			1	1					1	1	53.8462							1		1					1
	9	Antidesma ghaesembilla Gaern	Phyllanthaceae		pune (parepare), mayam (kalsel)							0						0														0
	10	Archidendron jiringa (Jack) I. C. Nielsen)	Fabaceae		jiringa, jengkol	1	1		1			50						0	1		1	1										23.0769
	11	Ardisia elliptica Thunb.	Primulaceae	shoebutton, inkberry	wuni, buni keraton, lempeni					1		16.6667						0														0
	12	Arenga pinnata (Wurmb.) Merr.	Arecaceae	sugar palm	aren, enau, kawung			1				16.6667						0				1		1						1		23.0769								1
	13	Arthocarpus heterophyllus Lam.	Moraceae	jackfruit	nangka	1	1	1	1	1	1	100	1	1	1	1	1	100	1	1	1	1	1	1	1	1	1	1	1	1	1	100	1	1	1	1	1	1	1	1	1	1	1	1	1	1	1	1	1
	14	Arthocarpus altilis (Parkinson) Fosberg /A. communis	Moraceae	breadfruit	sukun	1	1	1	1	1	1	100			1	1	1	60	1			1	1	1	1	1	1	1	1	1		76.9231	1	1	1	1	1	1	1	1	1		1	1		1	1		1
	15	Arthocarpus camansi Blanco	Moraceae	breadnut	keluwih, kluwih		1					16.6667						0		1												7.69231		1
	16	Arthocarpus elasticus Reinw.	Moraceae		benda, tarok, teureup, tipulu, tarap	1	1				1	50			1			20	1		1											15.3846
	17	Arthocarpus integer Spreng.	Moraceae		cempedak		1				1	33.3333						0														0
	18	Arthocarpus rigidus Blume	Moraceae	monkey jackfruit	pussar, mandalika, mandalika kujan, nangka tempunik, tempunit							0						0														0
	19	Averrhoa bilimbi L	Oxalidaceae		belimbing wuluh	1	1	1	1	1	1	100		1	1		1	60	1		1		1	1		1	1	1				53.8462	1	1				1	1	1	1	1	1		1	1	1	1	1
	20	Averrhoa carambola L.	Oxalidaceae	star fruit	belimbing	1	1	1	1	1	1	100		1		1	1	60	1		1	1		1		1	1		1	1	1	69.2308	1	1	1		1	1	1	1	1	1	1	1	1	1	1	1	1
	21	Baccaurea racemosa (Reinw.) Muell. Arg	Phyllanthaceae		menteng, kepundung, mundung, bencoy							0	1					20			1				1							15.3846
	22	Baccaurea sp (B. macrocarpa)	Phyllanthaceae		menteng nagari, rabai, cupak, rambai				1			16.6667						0														0
	23	Bellucia pentamera Naudin	Melastomataceae		Jambu hutan, jambu tangkalak, jambu akasia							0						0														0
	24	Borassus aethiopum Mart.	Arecaceae	Afrikan fan palm, ron palm, toddy palm								0						0														0
	25	Borassus flabellifer L.	Arecaceae	Palmyra palm, tala palm, toddy palm	siwalan, lontar, lontara, tala			1				16.6667				1		20														0
	26	Borassus heineanus Becc.	Arecaceae		Palem lontar irian, palem kipas, kelapa hutan, waribo							0						0														0										1
	27	Bouea macrophylla Griffith	Anacardiaceae	marian plum	gandaria, ramania, jatake							0						0	1	1	1											23.0769						1
	28	Breynia cernua (Poir.) Mull.Arg. Mueller Argoviensis	Phyllanthaceae	breynia, coffee bush	tandangolu							0						0														0
	29	Bruguiera gymnorrhiza Lamk	Rhizophoraceae		tanjang merah, aibon, parepat darat, parai, salak-salak							0						0														0
	30	Burckella obovata (G. Forst.) Pierre	Sapotaceae		Nyatoh, buah kaum, takun							0						0														0
	31	Calophyllum soulattri Burm. f.	Calophyllaceae		Bintangor, ntorang, nyanyamplungan							0						0														0
	32	Canarium commune L.	Burseraceae	java almond, kenari nut	kenari, kenari Bogor					1	1	33.3333					1	20	1	1	1	1	1	1	1				1	1		69.2308	1	1			1		1	1					1
	33	Canarium decumanum Gaertn.	Burseraceae		kenari Singkawang, kenay NTT							0						0														0
	34	Carica papaya L	Caricaceae	papaya	pepaya	1	1	1	1			66.6667	1	1	1	1		80				1	1	1		1	1			1	1	53.8462		1	1		1	1	1	1	1		1	1	1		1		1
	35	Castanopsis acuminatissima (Blume) A. DC	Fagaceae	papua oak	Ki riung anak, ki anak, riung anak, heye							0						0														0
	36	Citrus aurantifolia (Christm.) Swingle	Rutaceae		Jeruk nipis	1	1					33.3333						0					1									7.69231	1					1		1	1					1			1
	37	Citrus grandis Osbeck	Rutaceae	pamelo	jeruk bali				1		1	33.3333						0											1		1	15.3846						1				1			1
	38	Citrus sinensis L. Osbeck	Rutaceae	sweet orange	jeruk manis	1	1					33.3333						0									1	1		1	1	30.7692	1							1			1				1		1
	39	Citrus limon (L.) Burm.f.	Rutaceae	Lemon	Jeruk lemon, jeruk sitrun							0		1				20					1					1			1	23.0769
	40	Cocos nucifera	Arecaceae	coconut	kelapa	1	1	1	1	1	1	100	1	1	1	1	1	100	1			1	1	1		1	1		1	1	1	69.2308	1		1	1	1	1	1	1	1		1	1	1	1	1	1	1
	41	Coffea arabica L.	Rubiaceae	coffee	kopi	1						16.6667						0		1												7.69231		1
	42	Coffea excelca L.	Rubiaceae		Kopi ekselsa							0						0														0
	43	Crysophyllum cainito L.	Sapotaceae	star apple	sawo duren, sawo ijo, sawo manila, kenitu, genitu	1	1		1		1	66.6667				1		20	1		1		1			1			1			38.4615	1						1	1					1
	44	Cynometra cauliflora L.	Fabaceae		namu-namu, nam-nam, pukih		1					16.6667				1		20	1													7.69231							1
	45	Dimorcarpus longan (Lour.) Steud	Sapindaceae	longan	kelengkeng, lengkeng	1	1	1	1	1		83.3333		1		1		40	1	1	1	1	1		1	1	1	1		1	1	84.6154		1	1	1	1	1	1	1	1	1	1	1	1	1	1	1	1
	46	Diospyros blancoi A.DC.	Ebenaceae	velvet apple, mabolo	bisbul, sembolo		1				1	33.3333			1		1	40	1		1			1		1			1			38.4615	1						1		1		1				1
	47	Diospyros kaki L.f	Ebenaceae	persimmon	kesemek, semek							0	1					20														0
	48	Dracontomelon dao (Blanco) Merr. & Rolfe	Anacardiaceae	pacific walnut	rao, dahu, sengkuang							0						0														0
	49	Durio acutifolius (Mast.) Kosterm	Bombacaceae		durian burung							0						0														0
	50	Durio dulcis Becc	Bombacaceae		lai							0						0														0
	51	Durio kutejensis (Hassk.) Becc.	Bombacaceae		lahung, durian merah							0						0														0
	52	Durio oxleyanus Griffith	Bombacaceae		isu, karantungan, durian sukang, durian daun							0						0														0
	53	Durio zybethinus	Bombacaceae	durian	durian		1		1		1	50				1		20	1		1	1	1	1		1	1		1	1	1	76.9231	1	1	1	1		1	1	1
	54	Elaeocarpus floribundus Bl.	Elaeocarpaceae		Damu							0						0														0
	55	Elaeocarpus sphaericus (Gaertn.) K. Schum)	Elaeocarpaceae	rudraksha	ninto							0						0														0
	56	Elattostachys verrucosa (Blume) Radlk.	Sapindaceae		lowe api							0						0														0
	57	Enterolobium cyclocarpum (Jacq.) Griseb.	Fabaceae	guanacaste, elephant-ear tree	sengon buto							0						0		1												7.69231
	58	Eriobotrya japonica (Thunb.) Lindl.	Rosaceae	loquat	biwa, lokat, loukat							0						0	1													7.69231
	59	Eugenia uniflora Lam	Myrtaceae	pitanga	dewandaru	1	1					33.3333						0				1				1			1			23.0769
	60	Ficus carica	Moraceae	Fig tree	Buah tin							0						0														0
	61	Ficus fistulosa Reinw	Moraceae		Labe, benying, beunying , ai yumbul							0						0														0
	62	Ficus fulva Reinw. ex Bl.	Moraceae		Lento, hamerang minyak, kebeg lenga							0						0														0
	63	Ficus punctata Thunb.	Moraceae		Menca, ki batara							0						0														0
	64	Ficus racemosa L	Moraceae	Indian fig tree	loa, elo	1	1	1	1			66.6667	1			1	1	60	1	1	1								1	1		38.4615
	65	Ficus variegata Blume	Moraceae	red stem fig	ara, gondang, nyawai							0						0	1													7.69231			1				1
	66	Flacourtia inermis Roxb.	Salicaceae	batoko plum	lobi lobi							0	1					20	1		1											15.3846
	67	Flacourtia rukam Zoll. & Moritzi	Salicaceae	rukam	rakem, rukem							0						0														0
	68	Garcinia celebica L.	Clusiaceae	seashore mangosteen	baros, kalawet, mangggis hutan, sungkep, mandula							0						0														0
	69	Garcinia dulcis (Roxb.) Kurz	Clusiaceae	yellow mangosteen	mundu, badung							0	1					20	1		1											15.3846	1						1
	70	Garcinia mangostana L	Clusiaceae	mangosteen	manggis	1	1					33.3333						0	1	1	1	1				1	1					46.1538		1					1	1
	71	Garcinia xanthochymus Hook. f. ex T. Anders	Clusiaceae		asam kandis, asam gelugur							0						0			1											7.69231
	72	Gnetum gnemon Linn.	Gnetaceae	gnetum seed	melinjo, belinjo		1	1	1		1	66.6667			1			20	1	1					1	1			1	1		46.1538	1					1	1	1	1					1		1	1
	73	Hylocereus undatus (Haworth) Britton & Rose	Cactaceae	dragon fruit, pitaya	buah naga							0						0						1								7.69231
	74	Inga feuileei DC	Fabaceae		Buah es							0						0														0
	75	Inocarpus edulis Forst/Inocarpus fagiferus (Parkinson) Fosberg	Fabaceae	Tahitian chesnut	gayam, gayang							0						0														0							1
	76	Lannea coromandelica (Houtt.) Merr.	Anacardiaceae	Indian ash tree, gurjon	kudo reo, kudo, reo, ki kuda, kedondong laki, jaranan, kayu jawa			1		1		33.3333						0						1			1	1				23.0769									1	1		1	1		1		1
	77	Lansium domesticum Corr	Meliaceae	dokoo	duku	1	1					33.3333						0		1	1								1	1	1	38.4615								1						1
	78	Lansium parasiticum (Osbeck) K.C. Sahni & Bennet	Meliaceae		langsat, langsep, kokosan	1	1					33.3333						0														0								1
	79	Laucaena leucocephala (Lam.) de Wit	Fabaceae	river tamarind	mlanding, kemlandingan	1	1	1	1	1	1	100		1			1	40	1	1	1	1	1	1	1	1	1	1	1	1		92.3077				1		1	1		1		1		1	1	1		1
	80	Leea indica (Burm.f) Merr.	Vitaceae	bandicoot berry	Girang, ki tuwa, kayu tuwa, mali-mali, temali laki							0						0														0
	81	Litchi chinensis Sonn.	Sapindaceae	lychee	leci							0						0	1	1	1											23.0769
	82	Litsea resinosa Blume	Lauraceae		medang bedaka							0						0														0
	83	Mangifera applanata Kosterm	Anacardiaceae		Asem depah, asem kepeng, pelipisan, pau poco							0						0														0
	84	Mangifera caesia Jack ex Wall.	Anacardiaceae	machang	wani Bali, mangga binjai							0						0														0
	85	Mangifera casturi Kosterm	Anacardiaceae	casturi mango	mangga kasturi, kesturi							0			1			20								1				1		15.3846							1
	86	Mangifera foetida Lour	Anacardiaceae	horse mango	limus, bacang, embacang	1	1				1	50						0	1	1	1	1	1			1				1	1	61.5385	1						1	1		1						1	1
	87	Mangifera indica L.	Annacardiaceae	mango	mangga	1	1	1	1	1	1	100	1	1	1	1	1	100	1	1	1	1	1	1	1	1	1	1	1	1	1	100	1	1	1	1	1	1	1	1	1	1	1	1	1	1	1	1	1
	88	Mangifera kamanga Blume	Anacardiaceae		kemang		1	1				33.3333						0														0
	89	Mangifera laurina Blume	Annacardiaceae		Mangga hutan, mangga pari, pelem kecik							0						0														0
	90	Mangifera pajang Kosterm.	Anacardiaceae		mangga pajang, bambangan							0						0														0
	91	Mangifera sp.	Annacardiaceae		Mangga hitam, mangga wulung							0						0														0
	92	Mangifera x odorata Griffith	Anacardiaceae		kwini, kweni, kuwini	1			1			33.3333				1		20											1			7.69231
	93	Manilkara kauki (L.) Duby (Sapot)	Sapotaceae		sawo kecik			1		1		33.3333	1	1	1	1	1	100	1		1			1	1			1	1	1	1	61.5385	1		1		1		1	1	1	1		1	1	1	1	1	1
	94	Manilkara zopota L.	Sapotaceae	sapodilla	sawo							0						0	1	1	1		1			1	1			1	1	61.5385					1	1	1		1	1	1					1	1
	95	Medinilla speciosa Reinw. ex Blume	Melastomataceae		trijata, parijotho							0						0														0
	96	Mimusops elengi Linn	Sapotaceae		tanjung	1	1		1	1	1	83.3333	1	1	1	1	1	100	1	1		1	1		1	1			1		1	61.5385	1	1	1	1	1	1	1	1		1	1	1	1	1	1	1	1
	97	Morinda citrifolia L	Rubiaceae	Morinda	mengkudu, pace	1	1		1	1	1	83.3333		1	1	1	1	80	1	1	1			1		1			1	1	1	61.5385		1	1	1		1		1			1	1	1	1	1		1
	98	Morus indica L	Moraceae	mulberry	murbei, arbei		1	1	1		1	66.6667						0				1										7.69231			1
	99	Muntingia calabura L.	Muntingiaceae	calabur tree	kersen, talok	1	1	1	1	1	1	100		1	1		1	60	1	1	1	1	1	1	1	1	1	1	1	1	1	100	1	1		1	1	1	1	1	1	1	1	1	1		1	1	1
	100	Musa paradisiaca L	Musaceae	banana	pisang	1	1	1	1	1	1	100				1	1	40				1	1			1	1		1	1		46.1538	1	1				1	1	1		1			1		1	1
	101	Myristica argantea Warb	Myristicaceae		pala fakfak, pala papua							0						0														0
	102	Myristica fatua Houtt	Myristicaceae	wild nutmeg	pala utan, mendarahan							0						0														0
	103	Myristica fragrans Houtt	Myristicaceae	nutmeg	pala, pala banda							0						0	1			1	1									23.0769
	104	Nephelium lappaceum L.	Sapindaceae		rambutan	1	1	1	1		1	83.3333						0	1	1	1	1	1	1	1	1	1		1	1	1	92.3077	1	1		1		1	1	1	1		1						1
	105	Nephelium mutabile Blume	Sapindaceae		kapulasan, rambutan botak, tanggaring, maritam							0						0														0
	106	Palaquium leiocarpum Boerl.	Sapotaceae		jongkang, hangkang, nyatoh jangkar							0						0														0
	107	Palaquium obovatum(Griff.) Engl.	Sapotaceae		Kempo, osi							0						0	1													7.69231
	108	Pandanus brossimos Merr. & Perry	Pandanaceae		Kelapa hutan, woromo, tuke							0						0														0
	109	Pandanus conoideus Lam	Pandanaceae	Red fruit	buah merah, saik-eken							0						0														0
	110	Pandanus julianettii Mart.	Pandanaceae		Kelapa hutan, gawen, tuke, saluke							0						0														0
	111	Pangium edule Reinw.	Achariaceae		picung, pucung, klewek, kalawak							0						0												1		7.69231								1
	112	Parkia javanica Lam	Fabaceae		kedaung, kedhawung							0						0		1												7.69231
	113	Parkia speciosa Hassk	Fabaceae		petai	1	1	1	1			66.6667					1	20				1		1	1	1	1	1			1	53.8462	1	1			1		1	1	1							1
	114	Passiflora edulis Sims.	Passifloraceae	passion fruit	buah negri							0						0														0
	115	Passiflora lingularis L.	Passifloraceae	passion fruit	markisa							0						0														0
	116	Persea americana Mill	Lauraceae	avocado	alpokat	1	1	1	1		1	83.3333			1	1		40		1	1		1		1	1	1			1	1	61.5385	1				1	1			1	1	1	1		1	1
	117	Phoenix canariensis	Arecaceae	Canary date	Kurma kenari					1	1	33.3333	1	1	1		1	80	1						1							15.3846										1				1	1		1
	118	Phoenix dactylifera	Arecaceae	Date	Kurma	1	1	1		1	1	83.3333	1	1	1	1		80	1		1					1	1	1	1	1		53.8462	1								1	1				1	1	1	1
	119	Phylanthus acidus (L.) Skeells	Phyllanthaceae	star bery	ceremai, cermai							0		1	1			40		1											1	15.3846									1								1
	120	Phylantus emblica L.	Phyllanthaceae	emblic, amla, gooseberry	malaka, mloko, kemloko							0						0														0
	121	Pithecelobium dulce (Roxb.) Benth	Fabaceae	manila tamarind	asam keranji	1		1	1	1	1	83.3333	1	1	1	1	1	100	1	1	1		1		1		1	1		1		61.5385	1		1				1				1	1			1		1
	122	Pometia pinnata J. R & G. Forst	Sapindaceae	Fijian longan	matoa, kasai, kaili, tawang	1	1				1	50					1	20	1		1	1	1	1		1	1		1		1	69.2308	1	1	1	1	1		1	1	1	1		1	1			1
	123	Pometia tomentosa T & B	Sapindaceae		lengsir							0						0				1										7.69231									1
	124	Pouteria caimito Radlk.	Sapotaceae	abiu	sawo mangga							0						0														0
	125	Pouteria campechiana Baehni	Sapotaceae	canistel, yellow sapote	alkesa, kanistel, sawo mentega, sawo ubi, sawo Belanda							0						0								1			1			15.3846
	126	Prunus arborea (Blume) Kalkman	Rosaceae		Kenda, akil, jenteli, kalana, hokio							0						0														0
	127	Prunus avium L.	Rosaceae	sweet cherry	ceri burung							0				1		20														0
	128	Psidium guajava Linn.	Myrtaceae	guava	jambu biji	1	1	1	1		1	83.3333		1			1	40		1	1	1	1	1		1	1	1	1	1		76.9231		1	1	1	1		1	1	1	1	1	1		1			1
	129	Punica granatum L.	Lythraceae	pomegranate	delima	1				1		33.3333					1	20					1	1					1	1	1	38.4615							1			1			1	1			1
	130	Rubus moluccanus L	Rosaceae	rubus	rubus, ucen maluku							0						0														0
	131	Salacca zalacca	Arecaceae	snake fruit	salak				1			16.6667						0				1										7.69231				1				1
	132	Sandorium koetjape (Burm.f.) Merr.	Meliaceae	santol	kecapi, sentul						1	16.6667						0	1		1											15.3846
	133	Sararanga sinuosa Hemsley	Pandanaceae		anggur papua, selre							0				1		20														0
	134	Schleichera oleosa (Lour.) Oken	Sapindaceae	gum-lac tree	kesambi, kosambi, sirlak			1				16.6667						0														0							1		1			1					1
	135	Scorodocarpus borneensis (Baill.) Becc	Olacaceae		kulim, kayu bawang, bawang hutan							0						0														0
	136	Solanum betaceum Cav.	Solanaceae	tamarillo	terong belanda, terung belanda, terong mener							0						0														0
	137	Spondias dulcis L.	Anacardiaceae	ambarela	kedondong liar, kedondong kecil							0						0		1												7.69231
	138	Spondias pinnata (L.f.) Kurz	Anacardiaceae	hog plum, wild mango	kedondong, dondong	1	1	1	1	1		83.3333			1		1	40										1		1		15.3846	1					1		1	1	1	1			1	1	1	1
	139	Stelechocarpus burahol (Blume) Hook F & Thomson	Anacardiaceae		kepel, burahol							0	1					20														0							1
	140	Sterculia shillinglawii F.Muell	Malvaceae	wild almond tree	woton, kelumpang, pinpin, mandyagwe							0						0														0							1
	141	Syzygium aqueum Burm F	Myrtaceae	rose apple	jambu air	1		1	1	1	1	83.3333	1	1	1	1	1	100	1	1	1	1	1	1	1	1	1	1	1	1	1	100	1	1	1	1	1	1	1	1	1	1	1	1	1	1	1	1	1
	142	Syzygium cumini (L.) Skeels	Myrtaceae	java plum	jamblang, duwet, jambu kalang, jambu kaliang, jambolan							0						0	1	1	1				1			1				38.4615							1					1		1			1
	143	Syzygium cymosum (Lam.) DC.	Myrtaceae		jambu kopo, mantingan, kisireum							0						0												1		7.69231
	144	Syzygium jambos Linn.	Myrtaceae	rose apple	jambu mawar							0						0	1	1												15.3846
	145	Syzygium laxiflorum	Myrtaceae		mpui, merik							0						0														0
	146	Syzygium mallaccense (L.) Merr. & Perry	Myrtaceae	malay apple	jambu bol, jambu dersono, jambu dipa, jambu jamaika, jambu rutong	1	1	1	1	1	1	100			1		1	40	1	1	1	1	1	1		1	1	1		1	1	84.6154	1	1			1		1	1						1		1
	147	Syzygium polycephalum (Mig.) Merr & Perry	Myrtaceae		gowok, kupa, kali asem, ruruhi							0						0														0
	148	Tamarindus indica L.	Fabaceae	tamarind	asem jawa	1		1	1			50	1	1	1	1		80	1	1	1			1	1		1	1				53.8462	1			1		1	1	1	1	1	1	1	1	1	1		1
	149	Theobroma cacao L.	Malvaceae	cocoa	kakao, coklat	1	1				1	50						0	1	1	1										1	30.7692							1
	150	Triphasia trifolia	Rutaceae	Lime berry	jeruk kinkit merah							0						0														0
	151	Ziziphus mauritiana Lam. Syn Zizipus jujuba (L.) Gaertn	Rhamnaceae	jujube	bidara, widara, kom							0						0														0
		Total fruit species				42	46	33	34	25	33	35.5	19	20	24	25	27	23	47	35	39	30	29	29	21	33	29	22	29	36	30	31.4615	30	23	18	16	19	27	46	35	32	25	22	22	22	26	26	20	34
		Total tree species found in the city				105	98	89	93	71	78	89	57	54	62	71	82	65.2	104	79	82	74	65	71	80	72	75	73	68	92	67	77.0769	73	60	56	55	58	61	120	94	81	60	59	55	70	74	61	73	75
		Percentage fruit species (%)				40	46.9388	37.0787	36.5591	35.2113	42.3077	39.6826	33.3333	37.037	38.7097	35.2113	32.9268	35.4436	45.1923	44.3038	47.561	40.5405	44.6154	40.8451	26.25	45.8333	38.6667	30.137	42.6471	39.1304	44.7761	40.8076	41.0959	38.3333	32.1429	29.0909	32.7586	44.2623	38.3333	37.234	39.5062	41.6667	37.2881	40	31.4286	35.1351	42.623	27.3973	45.3333
	Note: '1' means present, otherwise absent
[truncated: 214 more columns]
