# Supplementary material
Source: MDPI journal article supplement (https://www.mdpi.com/2071-1050/13/14/7835)

## Review process in the first step of study

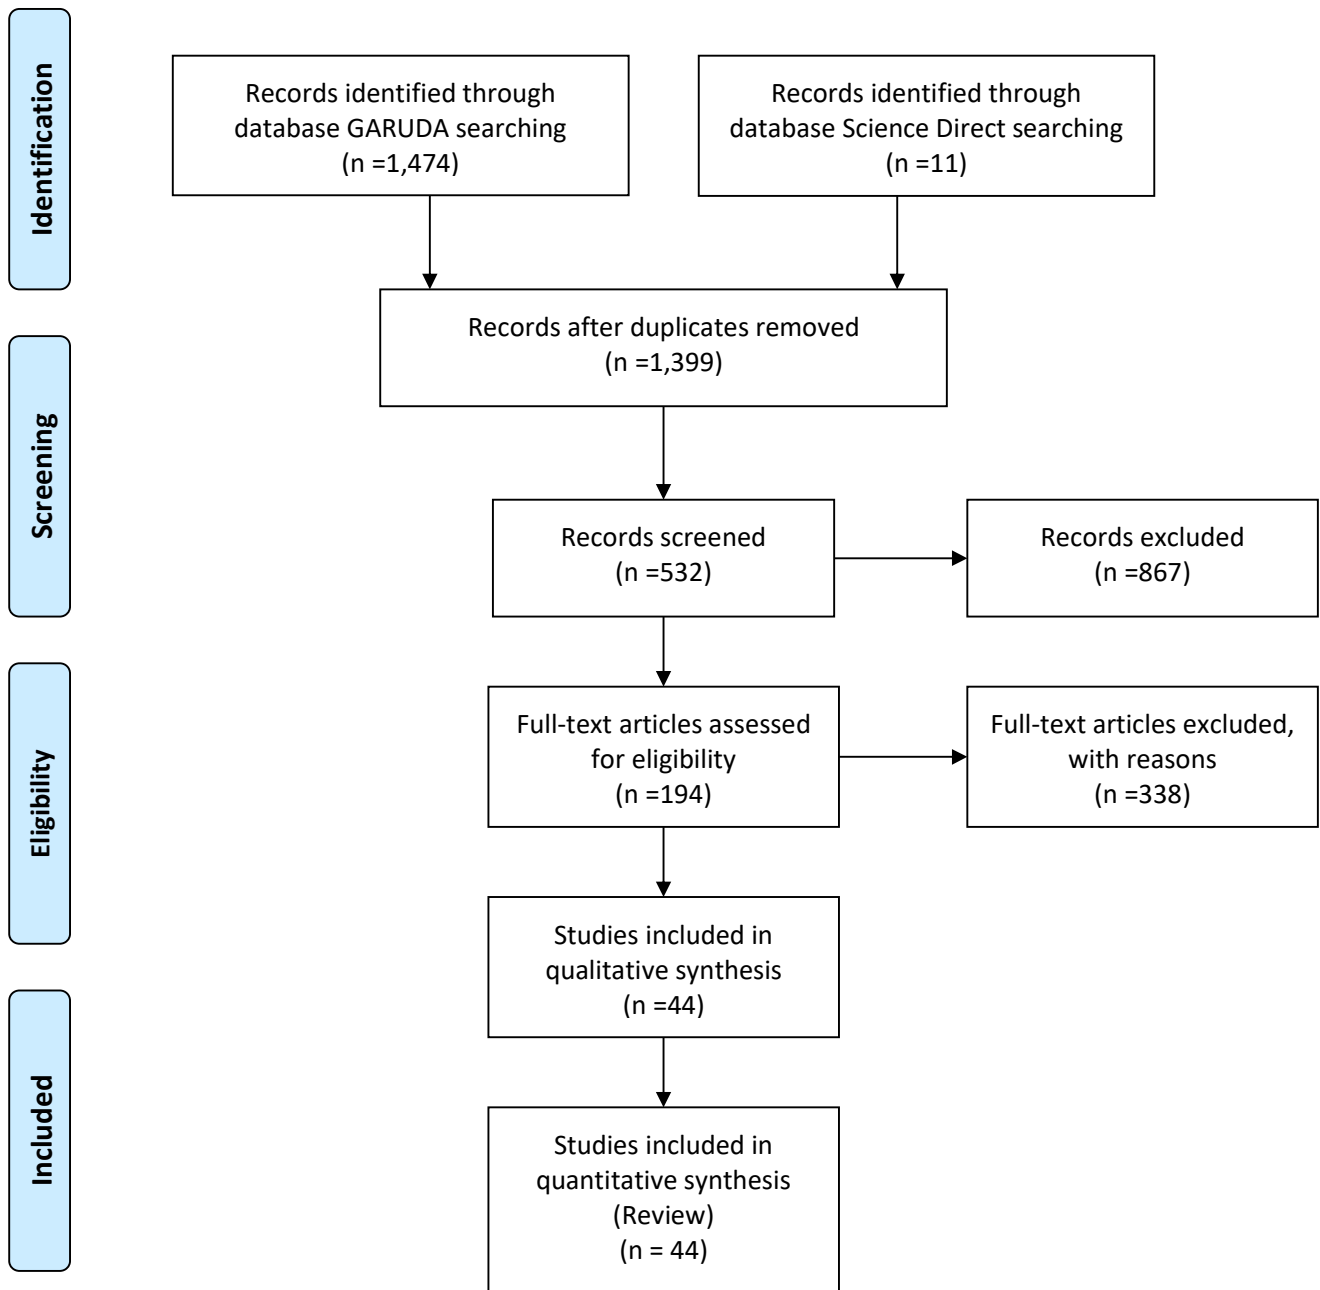

Supplement: s1 [file s1]
